# Mobility network modeling explains higher SARS-CoV-2 infection rates among disadvantaged groups and informs reopening strategies

Serina Chang<sup>\*,1</sup>, Emma Pierson<sup>\*,1</sup>, Pang Wei Koh<sup>\*,1</sup>,  
Jaline Gerardin<sup>2</sup>, Beth Redbird<sup>3,4</sup>, David Grusky<sup>5,6</sup>, Jure Leskovec<sup>†,1,7</sup>

<sup>1</sup> Department of Computer Science, Stanford University, Stanford, CA 94305, USA

<sup>2</sup> Department of Preventive Medicine, Northwestern University, Chicago, IL 60611, USA

<sup>3</sup> Department of Sociology, Northwestern University, Evanston, IL, 60208, USA

<sup>4</sup> Institute for Policy Research, Northwestern University, Evanston, IL, 60208, USA

<sup>5</sup> Department of Sociology, Stanford University, Stanford, CA 94305, USA

<sup>6</sup> Center on Poverty and Inequality, Stanford University, Stanford, CA 94305, USA

<sup>7</sup> Chan Zuckerberg Biohub, San Francisco, CA 94158, USA

\* These authors contributed equally to this work

† Corresponding author. Email: [jure@cs.stanford.edu](mailto:jure@cs.stanford.edu)

**Fine-grained epidemiological modeling of the spread of SARS-CoV-2—capturing who is infected at which locations—can aid the development of policy responses that account for heterogeneous risks of different locations as well as the disparities in infections among different demographic groups. Here, we develop a metapopulation SEIR disease model that uses dynamic mobility networks, derived from US cell phone data, to capture the hourly movements of millions of people from local neighborhoods (census block groups, or CBGs) to points of interest (POIs) such as restaurants, grocery stores, or religious establishments. We simulate the spread of SARS-CoV-2 from March 1–May 2, 2020 among a population of 98 million people in 10 of the largest US metropolitan statistical areas. We show that by integrating these mobility networks, which connect 57k CBGs to 553k POIs with a total of 5.4 billion hourly edges, even a relatively simple epidemiological model can accurately capture the case trajectory despite dramatic changes in population behavior due to the virus. Furthermore, by modeling detailed information about each POI, like visitor density and visit length, we can estimate the impacts of fine-grained reopening plans: we predict that a small minority of “superspreader” POIs account for a large majority of infections, that reopening some POI categories (like full-service restaurants) poses especially large risks, and that strategies restricting maximum occupancy at each POI are more effective than uniformly reducing mobility. Our models also predict higher infection rates among disadvantaged racial and socioeconomic groups solely from differences in mobility: disadvantaged groups have not been able to reduce mobility as sharply, and the POIs they visit (even within the same category) tend to be smaller, more crowded, and therefore more dangerous. By modeling who is infected at which locations, our model supports fine-grained analyses that can inform more effective and equitable policy responses to SARS-CoV-2.**

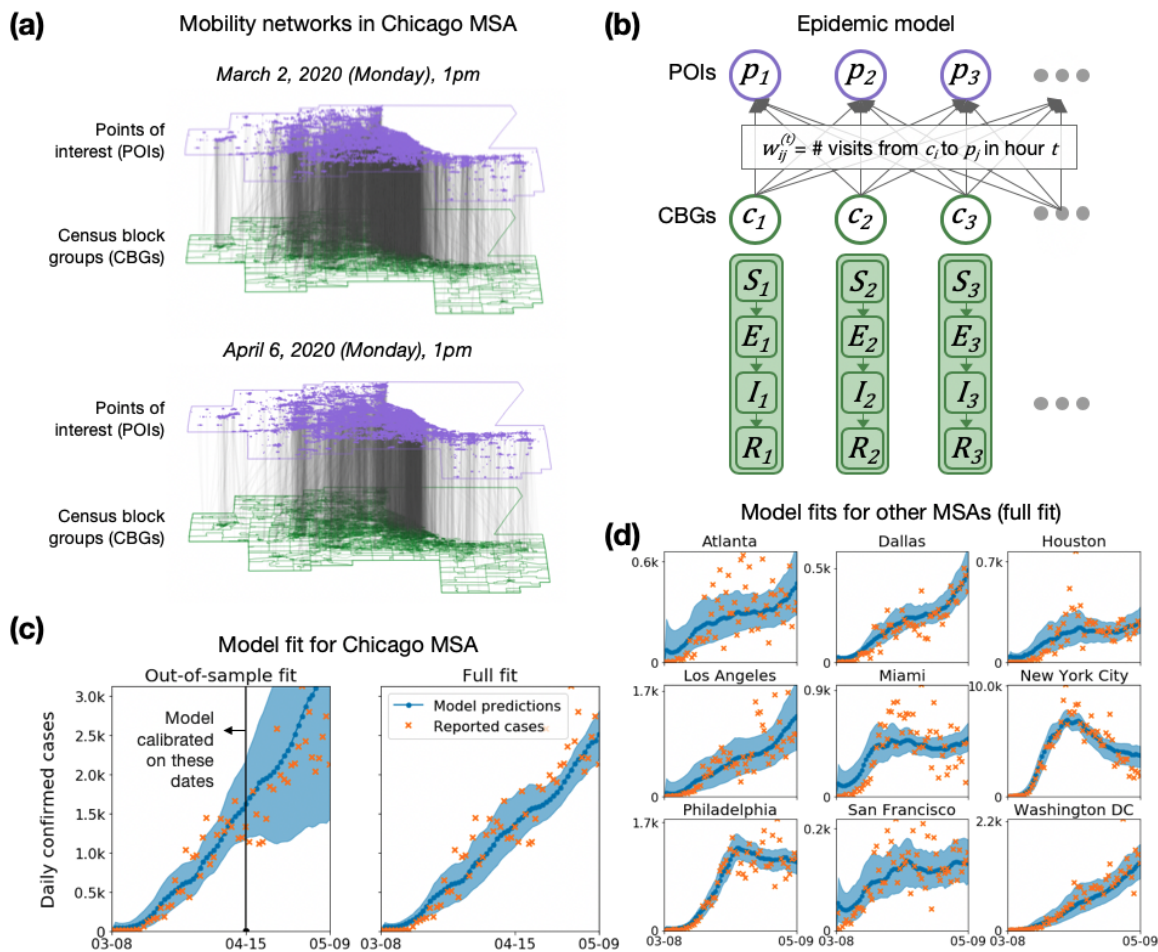

**Figure 1: Model description and fit.** (a) The mobility network captures hourly visits from each census block group (CBG) to each point of interest (POI). The vertical lines indicate that most visits are between nearby POIs and CBGs. Visits dropped dramatically from March (top) to April (bottom), as indicated by the lower density of grey lines. (b) We overlaid an SEIR disease model on the mobility network, with each CBG having its own set of SEIR compartments. New infections occur at both POIs and CBGs. The model for each MSA has three free parameters, which remain fixed over time, scaling transmission rates at POIs; transmission rates at CBGs; and the initial fraction of infected individuals. To determine the transmission rate at a given time at each POI we use the mobility network, which captures population movements as well as visit duration and the POI physical area, to estimate the density of visitors at each POI. (c) Left: To test out-of-sample prediction, we calibrated the model on data before April 15, 2020 (vertical black line). Even though its parameters remain fixed over time, the model accurately predicts the case trajectory after April 15 by using mobility data. Shaded regions denote 2.5th and 97.5th percentiles across sampled parameters and stochastic realizations. Right: Model fit further improved when we calibrated the model on the full range of data. (d) We fit separate models to 10 of the largest US metropolitan statistical areas (MSAs), modeling a total population of 98 million people; here, we show full model fits, as in (c)-Right. While we use the Chicago MSA as a running example throughout the paper, we include results for all other MSAs in the SI.

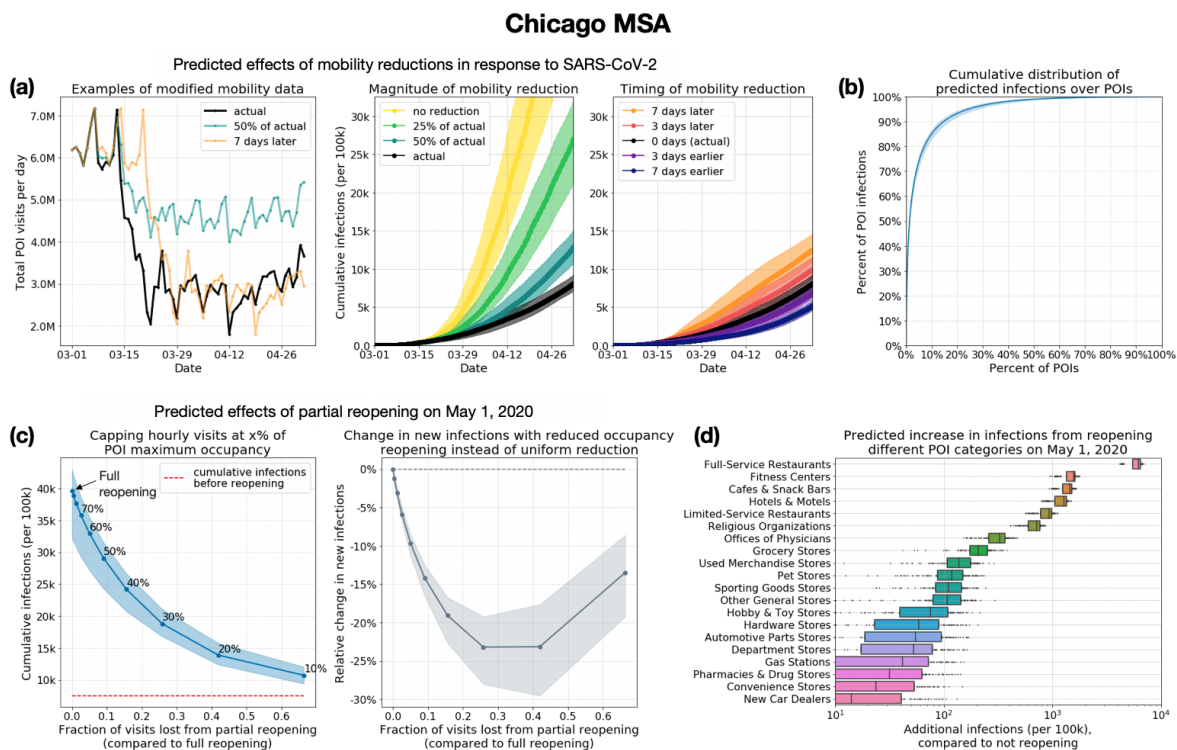

**Figure 2:** Assessing mobility reduction and reopening policies. **(a)** Counterfactual simulations (left) of the mobility reduction in March 2020—scaling its magnitude down, or shifting the timeline earlier or later—illustrate that the magnitude of mobility reduction (middle) was at least as important as its timing (right). Shaded regions denote 2.5th and 97.5th percentiles across sampled parameters and stochastic realizations. **(b)** Most infections at POIs occur at a small fraction of “super-spreader” POIs: 10% of POIs account for more than 80% of the total infections that occurred at POIs in the Chicago MSA (results for other MSAs in Extended Data Figure 3). **(c)** Left: We simulated partial reopening by capping hourly visits if they exceeded a fraction of each POI’s maximum occupancy. We plot cumulative infections at the end of one month of reopening against the fraction of visits lost by partial instead of full reopening; the annotations within the plot show the fraction of maximum occupancy used as the cap. Full reopening leads to an additional 32% of the population becoming infected by the end of the month, but capping at 20% maximum occupancy cuts down new infections by more than 80%, while only losing 42% of overall visits. Right: Compared to partially reopening by uniformly reducing visits, the reduced occupancy strategy—which disproportionately targets high-risk POIs with sustained high occupancy—always results in a smaller increase in infections for the same number of visits. The y-axis plots the relative difference between the increase in cumulative infections (from May 1 to May 31) under the reduced occupancy strategy as compared to the uniform reduction strategy. **(d)** We simulated reopening each POI category while keeping reduced mobility levels at all other POIs. Boxes indicate the interquartile range across parameter sets and stochastic realizations. Reopening full-service restaurants has the largest predicted impact on infections, due to the large number of restaurants as well as their high visit densities and long dwell times.

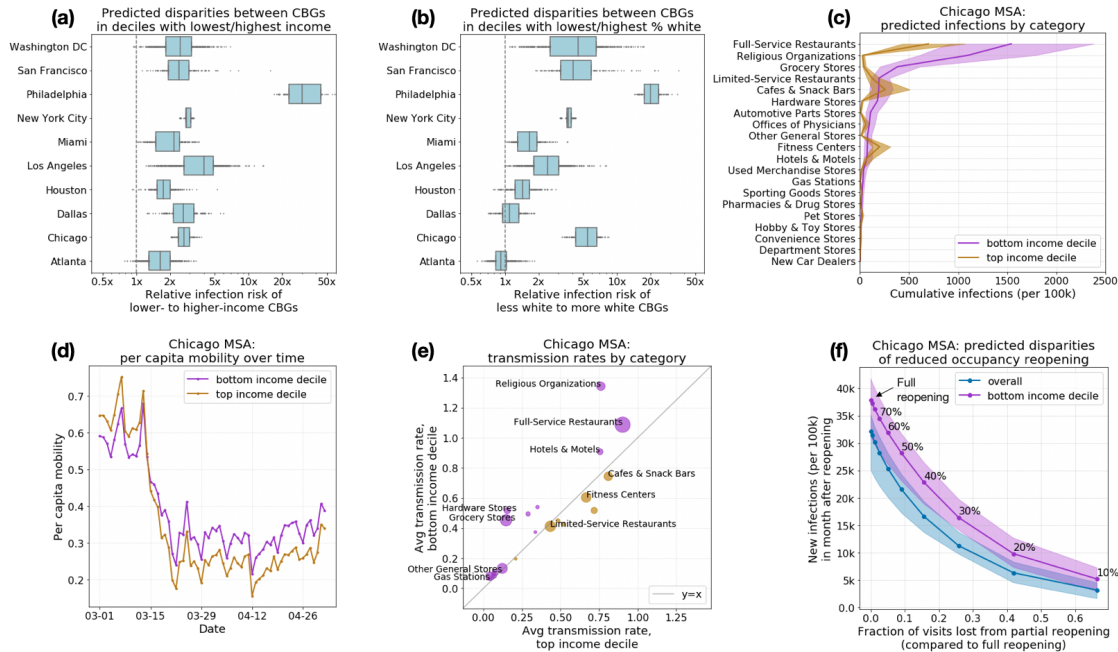

**Figure 3:** Mobility patterns give rise to socioeconomic and racial disparities in infections. **(a)** Across all MSAs, our model predicts that people in lower-income census block groups (CBGs) are more likely to be infected, even though they start with equal probabilities of being infected. Disparities are especially prominent in Philadelphia, which we discuss in SI Section S2. Boxes indicate the interquartile range across parameter sets and stochastic realizations. **(b)** Racial disparities are similar: people in non-white CBGs are typically more likely to be infected, although results are more variable across MSAs. (c-e) illustrate how mobility patterns give rise to socioeconomic disparities; similar mechanisms underlie racial disparities (Extended Data Figure 6, Table S5). **(c)** The overall disparity is driven by a few POI categories like full-service restaurants. Shaded regions denote 2.5th and 97.5th percentiles across sampled parameters and stochastic realizations. **(d)** One reason for the disparities is that higher-income CBGs were able to reduce their overall mobility levels below those of lower-income CBGs. **(e)** Within each category, people from lower-income CBGs tend to visit POIs that are smaller and more crowded and therefore have higher transmission rates. Thus, even if a lower-income and a higher-income person went out equally often and went to the same types of places, the lower-income person would still have a greater risk of infection. The size of each dot indicates the total number of visits to that category. **(f)** We predict the effect of reopening (at different levels of reduced occupancy) on different demographic groups. Reopening leads to more infections in lower-income CBGs (purple) than the overall population (blue), underscoring the need to account for disadvantaged subpopulations when assessing reopening plans.

## 1 Introduction

2 In response to the SARS-CoV-2 crisis, numerous stay-at-home orders were enacted across the  
3 United States in order to reduce contact between individuals and slow the spread of the virus.<sup>1</sup>  
4 As of May 2020, these orders are being relaxed, businesses are beginning to reopen, and mobility  
5 is increasing, causing concern among public officials about the potential resurgence of cases.<sup>2</sup>  
6 Epidemiological models that can capture the effects of changes in mobility on virus spread are  
7 a powerful tool for evaluating the effectiveness and equity of various strategies for reopening or  
8 responding to a resurgence. In particular, findings of SARS-CoV-2 “super-spreader” events<sup>3-7</sup>  
9 motivate models that can reflect the heterogeneous risks of visiting different locations, while well-  
10 reported racial and socioeconomic disparities in infection rates<sup>8-14</sup> require models that can explain  
11 the disproportionate impact of the virus on disadvantaged demographic groups.

12 To address these needs, we construct a fine-grained dynamic mobility network using US cell  
13 phone geolocation data from March 1–May 2, 2020. This network maps the hourly movements of  
14 millions of people from different census block groups (CBGs), which are geographical units that  
15 typically contain 600–3,000 people, to more than half a million specific points of interest (POIs),  
16 which are non-home locations that people visit such as restaurants, grocery stores, and religious  
17 establishments. (Table S1 provides the 50 POI categories accounting for the largest fraction of  
18 visits in this data.) On top of this dynamic bipartite network, we overlay a metapopulation SEIR  
19 disease model with only three free parameters that accurately tracks the infection trajectories of  
20 each CBG over time as well as the POIs at which these infections are likely to have occurred.  
21 The key idea is that combining even a relatively simple epidemiological model with our fine-  
22 grained, dynamic mobility network allows us to not only accurately model the case trajectory,  
23 but also identify the most risky POIs; the most at-risk populations; and the impacts of different  
24 reopening policies. This builds upon prior work that models disease spread using mobility data,  
25 which has used aggregate<sup>15-21</sup>, historical<sup>22-24</sup>, or synthetic<sup>25-27</sup> mobility data; separately, other work  
26 has directly analyzed mobility data and the effects of mobility reductions in the context of SARS-  
27 CoV-2, but without an underlying epidemiological model of disease spread.<sup>28-33</sup>

28 We use our model to simulate the spread of SARS-CoV-2 within 10 of the largest metropoli-  
29 tan statistical areas (MSAs) in the US, starting from a low, homogeneous prevalence of SARS-  
30 CoV-2 across CBGs. For each MSA, we examine the infection risks at individual POIs, the effects  
31 of past stay-at-home policies, and the effects of reopening strategies that target specific types of  
32 POIs. We also analyze disparities in infection rates across racial and socioeconomic groups, assess

33 the disparate impacts of reopening policies on these groups, and identify mobility-related mech-  
34 anisms driving these disparities. We find that people from lower-income CBGs have not reduced  
35 mobility as sharply, and tend to visit POIs which, even within the same category, are smaller, more  
36 crowded, and therefore more dangerous.

## 37 **Results**

### 38 **Mobility network modeling**

39 **Mobility network.** We use geolocation data from SafeGraph, a data company that aggregates  
40 anonymized location data from mobile applications, to study mobility patterns from March 1–May  
41 2, 2020 among a population of 98 million people in 10 of the largest US metropolitan statistical  
42 areas (MSAs). For each MSA, we represent the movement of individuals between census block  
43 groups (CBGs) and points of interest (POIs, defined as specific point locations that people visit  
44 such as restaurants, hotels, parks, and stores) as a bipartite network with time-varying edges, where  
45 the weight of an edge between a CBG and POI is the number of visitors from that CBG to that POI  
46 at a given hour (Figure 1a). SafeGraph also provides the area in square feet of each individual POI,  
47 as well as its North American Industry Classification System (NAICS) category (e.g., fitness center  
48 or full-service restaurant). We validated the SafeGraph data by comparing to Google mobility data  
49 (SI Section S1), and used iterative proportional fitting<sup>34</sup> to derive hourly POI-CBG networks from  
50 the raw SafeGraph data. Overall, these networks comprise 5.4 billion hourly edges between 56,945  
51 CBGs and 552,758 POIs (Extended Data Table 1).

52 **Model.** We overlay a SEIR disease model on each mobility network,<sup>15,22</sup> where each CBG main-  
53 tains its own susceptible (S), exposed (E), infectious (I), and removed (R) states (Figure 1b). New  
54 infections occur at both POIs and CBGs, with the mobility network governing how subpopulations  
55 from different CBGs interact as they visit POIs. We use the inferred density of infectious individu-  
56 als at each POI to determine its transmission rate. The model has only three free parameters, which  
57 scale (1) transmission rates at POIs, (2) transmission rates at CBGs, and (3) the initial proportion  
58 of infected individuals. All three parameters remain constant over time. We calibrate a separate  
59 model for each MSA using confirmed case counts from the *The New York Times*.<sup>35</sup>

60 **Model validation.** Our models accurately fit observed daily incident case counts in all 10 MSAs  
61 from March 8–May 9, 2020 (Figure 1c,d). Additionally, models only calibrated on case counts

62 from March 8–April 14 could predict case counts reasonably well on the held-out time period  
63 from April 15–May 9, 2020 (Figure 1c and Extended Data Figure 1a). Our key technical result  
64 is that the fine-grained mobility network allows even this relatively simple SEIR model to fit real  
65 case trajectories with just three free parameters which remain fixed over time, despite changing  
66 social distancing policies and behaviors during that period.

67 To assess the importance of the detailed mobility network, we tested two alternate models:  
68 an aggregate mobility model that uses the total number of POI visits in each hour without taking  
69 into account the type of POI or the CBGs from which visitors originate; and a baseline model that  
70 does not use mobility data at all. Our network model substantially outperformed both the aggregate  
71 mobility model and the baseline model on out-of-sample prediction (Extended Data Figure 1).  
72 Furthermore, both alternate models predict very similar rates of infection across all CBGs, which  
73 does not concord with previous work showing substantial heterogeneity in infection rates across  
74 neighborhoods.<sup>8–14</sup> This includes higher rates of infection among disadvantaged racial and socioe-  
75 conomic groups, which our model captures but the alternate models fail to reflect; we discuss this  
76 later in Figure 3. These results demonstrate that our network model can better recapitulate ob-  
77 served trends than an aggregate mobility model or a model that does not use mobility data, while  
78 also allowing us to assess fine-grained questions like the effects of POI-specific reopening policies.

## 79 **Evaluating mobility reduction and reopening policies**

80 We can estimate the impact of a wide range of mobility reduction and reopening policies by apply-  
81 ing our model to a modified mobility network that reflects the expected effects of a hypothetical  
82 policy. We start by studying the effect of the magnitude and timing of mobility reduction poli-  
83 cies from March 2020. We then assess several fine-grained reopening plans, such as placing a  
84 maximum occupancy cap or only reopening certain categories of POIs, by leveraging the detailed  
85 information that the mobility network contains on each POI, like its average visit length and visitor  
86 density at each hour.

87 **The magnitude of mobility reduction is as important as its timing.** US population mobility  
88 dropped sharply in March 2020 in response to SARS-CoV-2; for example, overall mobility in the  
89 Chicago MSA fell by 54.8% between the first week of March and the first week of April 2020.  
90 We constructed counterfactual mobility networks by scaling the magnitude of mobility reduction  
91 down and by shifting the timeline of this mobility reduction earlier and later (Figure 2a), and used

92 our model to simulate the resulting infection trajectories. As expected, shifting the onset of mo-  
93 bility reduction earlier decreased the predicted number of infections incurred, and shifting it later  
94 or reducing the magnitude of reduction both increased predicted infections. What was notable was  
95 that reducing the magnitude of reduction resulted in far larger increases in predicted infections  
96 than shifting the timeline later (Figure 2a). For example, if only a quarter of mobility reduction  
97 had occurred in the Chicago MSA, the predicted number of infections would have increased by  
98  $3.3\times$  (95% CI, 2.8-3.8), compared to a  $1.5\times$  (95% CI, 1.4-1.6) increase had people begun reduc-  
99 ing their mobility one full week later. We observe similar trends across other MSAs (Tables S2  
100 and S3). Our results concord with earlier findings that mobility reductions can dramatically reduce  
101 infections.<sup>21,36</sup>

102 **A minority of POIs account for a majority of infections.** Since overall mobility reduction re-  
103 duces infections, we next investigated if *how* we reduce mobility—i.e., to which POIs—matters.  
104 Using the observed mobility networks to simulate the infection trajectory from March 1–May 2,  
105 2020, we computed the number of expected infections that occurred at each POI and found that a  
106 majority of predicted infections occurred at a small fraction of “superspreader” POIs; e.g., in the  
107 Chicago MSA, 10% of POIs accounted for 85% (95% CI, 83%-87%) of the predicted infections  
108 at POIs (Figure 2b; Extended Data Figure 3 shows similar results across MSAs; across the 10  
109 MSAs, the top 10% of POIs accounted for between 75% and 96% of infections at POIs). These  
110 “superspreader” POIs are smaller and more densely occupied, and their occupants stay longer, sug-  
111 gesting that it is especially important to reduce transmission at these high-risk POIs. For example,  
112 in the Chicago MSA, the median number of hourly visitors per square foot was  $3.2\times$  higher for the  
113 riskiest 10% of POIs than for the remaining POIs (0.0041 versus 0.0012 visitors/foot<sup>2</sup>); the me-  
114 dian dwell time was  $3.5\times$  higher (81 versus 23 minutes). Note that infections at POIs represent a  
115 majority, but not all, of the total predicted infections, since we also model infections within CBGs;  
116 across MSAs, the median proportion of total predicted infections that occur at POIs is 70%.

117 **Reducing mobility by capping maximum occupancy.** We simulated the effects of two reopen-  
118 ing strategies, implemented beginning on May 1, on the increase in infections by the end of May.  
119 First, we evaluated a reduced occupancy reopening strategy, in which hourly visits to each POI re-  
120 turn to those in the first week of March (prior to widespread adoption of stay-at-home measures),  
121 but are capped if they exceed a fraction of the POI’s maximum occupancy,<sup>37</sup> which we estimated



122 as the maximum hourly number of visitors ever recorded at that POI. A full return to early March  
123 mobility levels without reducing maximum occupancy produces a spike in predicted infections:  
124 in the Chicago MSA, we project that an additional 32% (95% CI, 25%-35%) of the population  
125 will be infected within a month (Figure 2c). However, capping maximum occupancy substantially  
126 reduces risk without sharply reducing overall mobility: capping at 20% maximum occupancy in  
127 the Chicago MSA cuts down new infections by more than 80% but only loses 42% of overall vis-  
128 its, and we observe similar trends across other MSAs (Extended Data Figure 4). This highlights  
129 the non-linearity of infections as a function of visits: one can achieve a disproportionately large  
130 reduction in infections with a small reduction in visits.

131 We also compared the reduced occupancy strategy to a baseline that uniformly reduces visits  
132 to each POI from their levels in early March. Reduced occupancy always results in fewer infec-  
133 tions for the same total number of visits: e.g., capping at 20% maximum occupancy reduces new  
134 infections by 23% (95% CI, 18%-30%), compared to the uniform baseline for the same total num-  
135 ber of visits in the Chicago MSA (Figure 2c). This is because reduced occupancy takes advantage  
136 of the heterogeneous risks across POIs, disproportionately reducing visits at high-risk POIs with  
137 sustained high occupancy, but allowing lower-risk POIs to return fully to prior mobility levels.

138 **Relative risk of reopening different categories of POIs.** We assessed the relative risk of re-  
139 opening different categories of POIs by reopening each category in turn on May 1 (and returning  
140 its mobility patterns to early March levels) while keeping mobility patterns at all other POIs at  
141 their reduced, stay-at-home levels (Figure 2d). Following prior work,<sup>30</sup> we excluded several cat-  
142 egories of POIs from this analysis, including schools and hospitals, because of concerns that the  
143 cell phone mobility dataset might not contain all POIs in the category or capture all relevant risk  
144 factors; see Methods M6. We find a large variation in reopening risks: on average across the 10  
145 MSAs (Extended Data Figure 5), full-service restaurants, gyms, hotels, cafes, religious organiza-  
146 tions, and limited-service restaurants produce the largest increases in infections when reopened.  
147 Reopening full-service restaurants is particularly risky: in the Chicago MSA, we predict an addi-  
148 tional 596k (95% CI, 434k-686k) infections by the end of May, more than triple the next riskiest  
149 POI category. These risks are the total risks summed over all POIs in the category, but the relative  
150 risks after normalizing by the number of POIs are broadly similar, with restaurants, gyms, hotels,  
151 cafes, and religious establishments predicted to be the most dangerous on average per individual  
152 POI (Extended Data Figure 5). These categories are more dangerous because their POIs tend to

153 have higher visit densities and/or visitors stay there longer (Figures S10–S19).

## 154 **Infection disparities between socioeconomic and racial groups**

155 We characterize the differential spread of SARS-CoV-2 along demographic lines by using US Cen-  
156 sus data to annotate each CBG with its racial composition and median income, then tracking how  
157 infection disparities arise across groups. We use this approach to study the mobility mechanisms  
158 behind disparities and to quantify how different reopening strategies impact disadvantaged groups.

159 **Mobility patterns contribute to disparities in infection rates.** Despite only having access to  
160 mobility data and no other demographic information, our models correctly predicted higher risks of  
161 infection among disadvantaged racial and socioeconomic groups.<sup>8–14</sup> Across all MSAs, individuals  
162 from CBGs in the bottom decile for income were substantially likelier to have been infected by the  
163 end of the simulation, even though all individuals began with equal likelihoods of infection in our  
164 simulation (Figure 3a). This overall disparity was driven primarily by a few POI categories (e.g.,  
165 full-service restaurants), which infected far larger proportions of lower-income CBGs than higher-  
166 income CBGs (Figure 3c; similar trends hold across all MSAs in Figure S1). We similarly found  
167 that CBGs with fewer white residents had higher relative risks of infection, although results were  
168 more variable across MSAs (Figure 3b). Our models also recapitulated known associations be-  
169 tween population density and infection risk<sup>38</sup> (median Spearman correlation between CBG density  
170 and cumulative incidence proportion, 0.39 across MSAs), despite not being given any information  
171 on population density. In SI Section S2, we confirm that the magnitude of the disparities our model  
172 predicts are generally consistent with real-world disparities and further explore the large predicted  
173 disparities in Philadelphia, which stem from substantial differences in visit densities at the POIs  
174 that are frequented by visitors from different socioeconomic and racial groups. In the analysis be-  
175 low, we focus on the mechanisms producing higher relative risks of infection among lower-income  
176 CBGs, and we show in Extended Data Figure 6 and Table S5 that similar results hold for racial  
177 disparities as well.

178 **Lower-income CBGs saw smaller reductions in mobility.** Across all MSAs, we found that  
179 lower-income CBGs did not reduce their mobility as sharply in the first few weeks of March 2020,  
180 and had higher mobility than higher-income CBGs for most of March through May (Figure 3d, Ex-  
181 tended Data Figure 6). For example, over the month of April, lower-income CBGs in the Chicago

182 MSA had 27% more POI visits per capita than higher-income CBGs. Differences in mobility  
183 patterns within categories partially explained the within-category infection disparities: e.g., lower-  
184 income CBGs made substantially more visits per capita to grocery stores than did higher-income  
185 CBGs, and consequently experienced more infections at that category (Extended Data Figure 7).

186 **POIs visited by lower-income CBGs tend to have higher transmission rates.** Differences in  
187 the number of visits per capita between lower- and higher-income CBGs do not fully explain the  
188 infection disparities: for example, Cafes & Snack Bars were visited more frequently by people  
189 from higher-income CBGs in every MSA (Extended Data Figure 7), but they caused more pre-  
190 dicted infections among people from lower-income CBGs in the majority of MSAs (Figure S1).  
191 We found that even within a POI category, the transmission rate at POIs frequented by people from  
192 lower-income CBGs tended to be higher than the corresponding rate for higher-income CBGs (Fig-  
193 ure 3e; Table S4), because these POIs tended to be smaller and more crowded. It follows that, even  
194 if a lower-income and higher-income person had the same mobility patterns and went to the same  
195 types of places, the lower-income person would still have a greater risk of infection.

196 As a case study, we examine grocery stores in further detail. In 8 of the 10 MSAs, visitors  
197 from lower-income CBGs encountered higher transmission rates at grocery stores than those from  
198 higher-income CBGs (median transmission rate ratio of 2.19, Table S4). Why was one visit to the  
199 grocery store twice as dangerous for a lower-income individual? Taking medians across MSAs,  
200 we found that the average grocery store visited by lower-income individuals had 59% more hourly  
201 visitors per square foot, and their visitors stayed 17% longer on average. These findings highlight  
202 how fine-grained differences in mobility patterns—how often people go out, which categories of  
203 places they go to, which POIs they choose within those categories—can ultimately contribute to  
204 dramatic disparities in infection outcomes.

205 **Reopening plans must account for disparate impact.** Because disadvantaged groups suffer a  
206 larger burden of infection, it is critical to not just consider the overall impact of reopening plans  
207 but also their disparate impact on disadvantaged groups specifically. For example, our model  
208 predicted that full reopening in the Chicago MSA would result in an additional 39% (95% CI,  
209 31%-42%) of the population of CBGs in the bottom income decile being infected within a month,  
210 compared to 32% (95% CI, 25%-35%) of the overall population (Figure 3f; results for all MSAs  
211 in Extended Data Figure 4). Similarly, Extended Data Figure 8 illustrates that reopening individual

212 POI categories tends to have a larger impact on the bottom income decile. More conservative  
213 reopening plans produce smaller absolute disparities in infections—e.g., we predict that reopening  
214 at 20% of maximum occupancy would result in infections among an additional 6% (95% CI, 4%-  
215 8%) of the overall population and 10% (95% CI, 7%-13%) of the population in CBGs in the bottom  
216 income decile (Figure 3f)—though the relative disparity remains.

## 217 **Discussion**

218 We model the spread of SARS-CoV-2 using a dynamic mobility network that encodes the hourly  
219 movements of millions of people between 57k neighborhoods (census block groups, or CBGs)  
220 and 553k points of interest (POIs). Because our data contains detailed information on each POI,  
221 like visit length and visitor density, we can estimate the impacts of fine-grained reopening plans—  
222 predicting that a small minority of “superspreader” POIs account for a large majority of infections,  
223 that reopening some POI categories (like full-service restaurants) poses especially large risks, and  
224 that strategies that restrict the maximum occupancy at each POI are more effective than uniformly  
225 reducing mobility. Because we model infections in each CBG, we can infer the approximate de-  
226 mographics of the infected population, and thereby assess the disparate socioeconomic and racial  
227 impacts of SARS-CoV-2. Our model correctly predicts that disadvantaged groups are more likely  
228 to become infected, and also illuminates two mechanisms that drive these disparities: (1) dis-  
229 advantaged groups have not been able to reduce their mobility as dramatically (consistent with  
230 previously-reported data, and likely in part because lower-income individuals are more likely to  
231 have to leave their homes to work<sup>10</sup>) and (2) when they go out, they visit POIs which, even within  
232 the same category, are smaller, more crowded, and therefore more dangerous.

233 The cell phone mobility dataset we use has limitations: it does not cover all populations  
234 (e.g., prisoners, children under 13, or adults without smartphones), does not contain all POIs (e.g.,  
235 nursing homes are undercovered, and we exclude schools and hospitals from our analysis of POI  
236 category risks), and cannot capture sub-CBG heterogeneity in demographics. Individuals may also  
237 be double-counted in the dataset if they carry multiple cell phones. These limitations notwithstand-  
238 ing, cell phone mobility data in general and SafeGraph data in particular have been instrumental  
239 and widely used in modeling SARS-CoV-2 spread.<sup>15–17,28–32,39</sup> Our model itself is parsimonious,  
240 and does not include such relevant features as asymptomatic transmission; variation in house-  
241 hold size; travel and seeding between MSAs; differentials in susceptibility due to pre-existing  
242 conditions or access to care; age-related variation in mortality rates or susceptibility (e.g., for

243 modeling transmission at elementary and secondary schools); various time-varying transmission-  
244 reducing behaviors (e.g., hand-washing, mask-wearing); and some POI-specific risk factors (e.g.,  
245 ventilation). Although our model recovers case trajectories and known infection disparities even  
246 without incorporating these features, we caution that this predictive accuracy does not mean that  
247 our predictions should be interpreted in a narrow causal sense. Because certain types of POIs or  
248 subpopulations may disproportionately select for certain types of omitted processes, our findings  
249 on the relative risks of different POIs should be interpreted with due caution. However, the pre-  
250 dictive accuracy of our model suggests that it broadly captures the relationship between mobility  
251 and transmission, and we thus expect our broad conclusions—e.g., that people from lower-income  
252 CBGs have higher infection rates in part because because they tend to visit smaller, denser POIs  
253 and because they have not been able to reduce mobility by as much (likely in part because they  
254 cannot as easily work from home<sup>10</sup>)—to hold robustly.

255 Our results can guide policymakers seeking to assess competing approaches to reopening  
256 and tamping down post-reopening resurgence. Despite growing concern about racial and socioe-  
257 conomic disparities in infections and deaths, it has been difficult for policymakers to act on those  
258 concerns; they are currently operating without much evidence on the disparate impacts of reopen-  
259 ing policies, prompting calls for research which both identifies the causes of observed disparities  
260 and suggests policy approaches to mitigate them.<sup>11,14,40,41</sup> Our fine-grained mobility modeling ad-  
261 dresses both these needs. Our results suggest that infection disparities are not the unavoidable  
262 consequence of factors that are difficult to address in the short term, like disparities in preexisting  
263 conditions; on the contrary, short-term policy decisions substantially affect infection disparities  
264 by altering the overall amount of mobility allowed, the types of POIs reopened, and the extent to  
265 which POI occupancies are clipped. Considering the disparate impact of reopening plans may lead  
266 policymakers to, e.g., (1) favor more conservative reopening plans, (2) increase testing in disad-  
267 vantaged neighborhoods predicted to be high risk (especially given known disparities in access to  
268 tests<sup>8</sup>), and (3) prioritize distributing masks and other personal protective equipment to disadvan-  
269 taged populations who have not reduced their mobility as much and frequent riskier POIs.

270 As society reopens and we face the possibility of a resurgence in cases, it is critical to build  
271 models which allow for fine-grained assessments of the effects of reopening policies. We hope  
272 that our approach, by capturing heterogeneity across POIs, demographic groups, and cities, helps  
273 address this need.

## References

1. Wu, J. W., Smith, S., Khurana, M., Siemaszko, C. & DeJesus-Banos, B. Stay-at-home orders across the country. *NBC News* (2020). Available at <https://www.nbcnews.com/health/health-news/here-are-stay-home-orders-across-country-n1168736>.
2. Rojas, R. & Delkic, M. As states reopen, governors balance existing risks with new ones. *The New York Times* (2020). Available at <https://www.nytimes.com/2020/05/17/us/coronavirus-states-reopen.html>.
3. Endo, A., Abbott, S., Kucharski, A. J., Funk, S. *et al.* Estimating the overdispersion in COVID-19 transmission using outbreak sizes outside China. *Wellcome Open Research* **5**, 67 (2020).
4. Adam, D. *et al.* Clustering and superspreading potential of severe acute respiratory syndrome coronavirus 2 (SARS-CoV-2) infections in Hong Kong. Available at <https://europepmc.org/article/ppr/ppr165671>.
5. Miller, D. *et al.* Full genome viral sequences inform patterns of SARS-CoV-2 spread into and within Israel. *medRxiv* (2020). Available at <https://www.medrxiv.org/content/10.1101/2020.05.21.20104521v1.full.pdf>.
6. Park, S. Y. *et al.* Coronavirus Disease Outbreak in Call Center, South Korea. *Emerging Infectious Diseases* **26** (2020).
7. Bi, Q. *et al.* Epidemiology and transmission of COVID-19 in 391 cases and 1286 of their close contacts in Shenzhen, China: a retrospective cohort study. *The Lancet Infectious Diseases* (2020).
8. Wilson, C. These Graphs Show How COVID-19 Is Ravaging New York City's Low-Income Neighborhoods. *Time* (2020). Available at <https://time.com/5821212/coronavirus-low-income-communities/>.
9. Garg *et al.* Hospitalization Rates and Characteristics of Patients Hospitalized with Laboratory-Confirmed Coronavirus Disease 2019 — COVID-NET, 14 States, March 1—30, 2020 (CDC Morbidity and Mortality Weekly Report (MMWR), 2020). Available at <https://www.cdc.gov/mmwr/volumes/69/wr/mm6915e3.htm>.
10. Reeves, R. V. & Rothwell, J. Class and COVID: How the less affluent face double risks. *The Brookings Institution* (2020). Available at <https://www.brookings.edu/blog/up-front/2020/03/27/class-and-covid-how-the-less-affluent-face-double-risks/>.
11. Pareek, M. *et al.* Ethnicity and COVID-19: an urgent public health research priority. *The Lancet* **395**, 1421–1422 (2020).
12. van Dorn, A., Cooney, R. E. & Sabin, M. L. COVID-19 exacerbating inequalities in the US. *The Lancet* **395**, 1243–1244 (2020).
13. Yancy, C. W. COVID-19 and African Americans. *JAMA* **323**, 1891–1892 (2020).
14. Chowkwanyun, M. & Reed Jr, A. L. Racial Health Disparities and Covid-19—Caution and Context. *New England Journal of Medicine* (2020).
15. Chinazzi, M. *et al.* The effect of travel restrictions on the spread of the 2019 novel coronavirus (COVID-19) outbreak. *Science* **368**, 395–400 (2020).

16. Woody, S. *et al.* Projections for first-wave COVID-19 deaths across the US using social-distancing measures derived from mobile phones. *medRxiv* (2020). Available at [doi.org/10.1101/2020.04.16.20068163](https://doi.org/10.1101/2020.04.16.20068163).
17. Fenichel, E. P., Berry, K., Bayham, J. & Gonsalves, G. A cell phone data driven time use analysis of the COVID-19 epidemic. *medRxiv* (2020). Available at [doi.org/10.1101/2020.04.20.20073098](https://doi.org/10.1101/2020.04.20.20073098).
18. Unwin, H. *et al.* Report 23: State-level tracking of COVID-19 in the United States (2020). Available at [spiral.imperial.ac.uk/handle/10044/1/79231](https://spiral.imperial.ac.uk/handle/10044/1/79231).
19. Jia, J. S. *et al.* Population flow drives spatio-temporal distribution of COVID-19 in China. *Nature* (2020).
20. Pei, S., Kandula, S. & Shaman, J. Differential Effects of Intervention Timing on COVID-19 Spread in the United States. *medRxiv* (2020). Available at [doi.org/10.1101/2020.05.15.20103655](https://doi.org/10.1101/2020.05.15.20103655).
21. Lai, S. *et al.* Effect of non-pharmaceutical interventions to contain COVID-19 in China. *Nature* (2020).
22. Li, R. *et al.* Substantial undocumented infection facilitates the rapid dissemination of novel coronavirus (SARS-CoV2). *Science* **368**, 489–493 (2020).
23. Pei, S. & Shaman, J. Initial Simulation of SARS-CoV2 Spread and Intervention Effects in the Continental US. *medRxiv* (2020). Available at [doi.org/10.1101/2020.03.21.20040303](https://doi.org/10.1101/2020.03.21.20040303).
24. Aleta, A. *et al.* Modeling the impact of social distancing, testing, contact tracing and household quarantine on second-wave scenarios of the COVID-19 epidemic. *medRxiv* (2020). Available at [doi.org/10.1101/2020.05.06.20092841](https://doi.org/10.1101/2020.05.06.20092841).
25. Duque, D. *et al.* COVID-19: How to Relax Social Distancing If You Must. *medRxiv* (2020). Available at [doi.org/10.1101/2020.04.29.20085134](https://doi.org/10.1101/2020.04.29.20085134).
26. Block, P. *et al.* Social network-based distancing strategies to flatten the COVID-19 curve in a post-lockdown world. *Nature Human Behaviour* (2020).
27. Karin, O. *et al.* Adaptive cyclic exit strategies from lockdown to suppress COVID-19 and allow economic activity. *medRxiv* (2020). Available at [doi.org/10.1101/2020.04.04.20053579](https://doi.org/10.1101/2020.04.04.20053579).
28. Gao, S., Rao, J., Kang, Y., Liang, Y. & Kruse, J. Mapping county-level mobility pattern changes in the united states in response to covid-19. *SIGSPATIAL Special* **12**, 16–26 (2020).
29. Klein, B. *et al.* Assessing changes in commuting and individual mobility in major metropolitan areas in the United States during the COVID-19 outbreak (2020). Available at [networkscienceinstitute.org/publications/assessing-changes-in-commuting-and-individual-mobility-in-major-metropolitan-areas-in-the-united-states-during-the-covid-19-outbreak](https://networkscienceinstitute.org/publications/assessing-changes-in-commuting-and-individual-mobility-in-major-metropolitan-areas-in-the-united-states-during-the-covid-19-outbreak).
30. Benzell, S. G., Collis, A. & Nicolaides, C. Rationing social contact during the COVID-19 pandemic: Transmission risk and social benefits of US locations. *Proceedings of the National Academy of Sciences* (2020).
31. Galeazzi, A. *et al.* Human Mobility in Response to COVID-19 in France, Italy and UK (2020). Available at [arxiv.org/abs/2005.06341](https://arxiv.org/abs/2005.06341).

32. Baicker, K., Dube, O., Mullainathan, S., Devin, P. & Wezerek, G. Is It Safer to Visit a Coffee Shop or a Gym? *The New York Times* (2020). Available at <https://nytimes.com/interactive/2020/05/06/opinion/coronavirus-us-reopen.html>.
33. Hsiang, S. *et al.* The effect of large-scale anti-contagion policies on the coronavirus (COVID-19) pandemic. *Nature* (2020).
34. Deming, W. E. & Stephan, F. F. On a least squares adjustment of a sampled frequency table when the expected marginal totals are known. *The Annals of Mathematical Statistics* **11**, 427–444 (1940).
35. The New York Times. Coronavirus (Covid-19) Data in the United States (2020). Available at <https://github.com/nytimes/covid-19-data>.
36. Tian, H. *et al.* An investigation of transmission control measures during the first 50 days of the covid-19 epidemic in china. *Science* **368**, 638–642 (2020).
37. California Department of Public Health. COVID-19 Industry Guidance: Retail (2020). Available at <https://covid19.ca.gov/pdf/guidance-retail.pdf>.
38. Rosenthal, B. M. Density Is New York City’s Big ‘Enemy’ in the Coronavirus Fight. *The New York Times* (2020). Available at <https://nytimes.com/2020/03/23/nyregion/coronavirus-nyc-crowds-density.html>.
39. Buckee, C. O. *et al.* Aggregated mobility data could help fight COVID-19. *Science* **368**, 145 (2020).
40. Webb Hooper, M., Nápoles, A. M. & Pérez-Stable, E. J. COVID-19 and Racial/Ethnic Disparities. *JAMA* (2020).
41. Laurencin, C. T. & McClinton, A. The COVID-19 Pandemic: a Call to Action to Identify and Address Racial and Ethnic Disparities. *Journal of Racial and Ethnic Health Disparities* **7**, 398–402 (2020).
42. Hu, H., Nigmatulina, K. & Eckhoff, P. The scaling of contact rates with population density for the infectious disease models. *Mathematical biosciences* **244**, 125–134 (2013).
43. Kucharski, A. J. *et al.* Early dynamics of transmission and control of COVID-19: a mathematical modelling study. *The Lancet Infectious Diseases* **20**, 553 – 558 (2020).



## 274 **Methods**

275 The Methods section is structured as follows. We describe the datasets we use in Methods **M1**  
276 and the mobility network that we derive from these datasets in Methods **M2**. In Methods **M3**, we  
277 discuss the SEIR model we overlay on the mobility network; in Methods **M4**, we describe how  
278 we calibrate this model and quantify uncertainty in its predictions; in Methods **M5**, we introduce  
279 a series of sensitivity analyses and robustness checks that we performed to further validate our  
280 model. In Methods **M6**, we provide details on the experimental procedures used for our analysis of  
281 physical distancing, reopening, and demographic disparities. Finally, in Methods **M7**, we elaborate  
282 on how we estimate the mobility network from the raw mobility data.

### 283 **M1 Datasets**

284 **SafeGraph.** We use geolocation data provided by SafeGraph, a data company that aggregates  
285 anonymized location data from numerous mobile applications. We obtained IRB exemption for  
286 SafeGraph data from the Northwestern University IRB office. SafeGraph data captures the move-  
287 ment of people between census block groups (CBGs), which are geographical units that typically  
288 contain a population of between 600 and 3,000 people, and points of interest (POIs) like restau-  
289 rants, grocery stores, or religious establishments. Specifically, we use the following SafeGraph  
290 datasets:

- 291 1. Places Patterns<sup>44</sup> and Weekly Patterns (v1)<sup>45</sup>. These datasets contain, for each POI, hourly  
292 counts of the number of visitors, estimates of median visit duration in minutes (the “dwell  
293 time”), and aggregated weekly and monthly estimates of visitors’ home CBGs. We use  
294 visitor home CBG data from the Places Patterns dataset, as described below: for privacy  
295 reasons, SafeGraph excludes a home CBG from this dataset if fewer than 5 devices were  
296 recorded at the POI from that CBG over the course of the month. For each POI, SafeGraph  
297 also provides their North American Industry Classification System (NAICS) category, and an  
298 estimate of their physical area in square feet. (Area is computed using the footprint polygon  
299 SafeGraph assigns to the POI.<sup>46,47</sup>) We analyze Places Patterns data from January 1, 2019 to  
300 February 29, 2020 and Weekly Patterns data from March 1, 2020 to May 2, 2020.
- 301 2. Social Distancing Metrics,<sup>48</sup> which contains hourly estimates of the proportion of people  
302 staying home in each CBG. We analyze Social Distancing Metrics data from March 1, 2020  
303 to May 2, 2020.

304 We focus on 10 of the largest metropolitan statistical areas (MSAs) in the US (Extended Data  
305 Table 1). We chose these MSAs by taking a random subset of the SafeGraph Patterns data and  
306 picking the 10 MSAs with the most POIs in the data. Our methods in this paper can be straightfor-  
307 wardly applied, in principle, to the other MSAs in the original SafeGraph data. For each MSA, we  
308 include all POIs that meet all of the following requirements: (1) the POI is located in the MSA; (2)  
309 SafeGraph has visit data for this POI for every hour that we model, from 12am on March 1, 2020  
310 to 11pm on May 2, 2020; (3) SafeGraph has recorded the home CBGs of this POI’s visitors for at  
311 least one month from January 2019 to February 2020; (4) the POI is not a “parent” POI. “Parent”  
312 POIs comprise a small fraction of POIs in the dataset which overlap and include the visits from  
313 their “child” POIs: for example, many malls in the dataset are parent POIs which include the visits  
314 from stores which are their child POIs. To avoid double-counting visits, we remove all parent POIs  
315 from the dataset.

316 After applying these POI filters, we include all CBGs that have at least 1 recorded visit to  
317 at least 10 of the remaining POIs; this means that CBGs from outside the MSA may be included  
318 if they visit this MSA frequently enough. Summary statistics of the post-processed data are in  
319 Extended Data Table 1. Overall, we analyze 57k CBGs from the 10 MSAs, and over 310M visits  
320 from these CBGs to over 552k POIs.

321 SafeGraph data has been used to study consumer preferences<sup>49</sup> and political polarization.<sup>50</sup>  
322 More recently, it has been used as one of the primary sources of mobility data in the US for tracking  
323 the effects of the SARS-CoV-2 pandemic.<sup>28,30,51–53</sup> In SI Section S1, we show that aggregate trends  
324 in SafeGraph mobility data broadly match up to aggregate trends in Google mobility data in the  
325 US,<sup>54</sup> before and after the imposition of stay-at-home measures. Previous analyses of SafeGraph  
326 data have shown that it is geographically representative: for example, it does not systematically  
327 over-represent individuals from CBGs in different counties or with different racial compositions,  
328 income levels, or educational levels.<sup>55,56</sup>

329 **US Census.** Our data on the demographics of census block groups (CBGs) comes from the US  
330 Census Bureau’s American Community Survey (ACS).<sup>57</sup> We use the 5-year ACS (2013-2017)  
331 to extract the median household income, proportion of white residents, and proportion of black  
332 residents of each CBG. For the total population of each CBG, we use the most recent one-year  
333 estimates (2018); one-year estimates are noisier but we wish to minimize systematic downward  
334 bias in our total population counts (due to population growth) by making them as recent as possible.

335 **New York Times.** We calibrate our models using the SARS-CoV-2 dataset published by the *The*  
336 *New York Times*.<sup>35</sup> Their dataset consists of cumulative counts of cases and deaths in the United  
337 States over time, at the state and county level. For each MSA that we model, we sum over the  
338 county-level counts to produce overall counts for the entire MSA. We convert the cumulative case  
339 and death counts to daily case and death counts for the purposes of model calibration, as described  
340 below.

## 341 **M2 Mobility network**

342 We consider a complete undirected bipartite graph  $\mathcal{G} = (\mathcal{V}, \mathcal{E})$  with time-varying edges. The  
343 vertices  $\mathcal{V}$  are partitioned into two disjoint sets  $\mathcal{C} = \{c_1, \dots, c_m\}$ , representing  $m$  census block  
344 groups (CBGs), and  $\mathcal{P} = \{p_1, \dots, p_n\}$ , representing  $n$  points of interest (POIs). The weight  $w_{ij}^{(t)}$   
345 on an edge  $(c_i, p_j)$  at time  $t$  represents our estimate of the number of individuals from CBG  $c_i$   
346 visiting POI  $p_j$  at the  $t$ -th hour of simulation. We record the number of edges (with non-zero  
347 weights) in each MSA and over all hours from March 1, 2020 to May 2, 2020 in Extended Data  
348 Table 1. Across all 10 MSAs, we study 5.4 billion edges between 56,945 CBGs and 552,758 POIs.

349 From US Census data, each CBG  $c_i$  is labeled with its population  $N_{c_i}$ , income distribution,  
350 and racial and age demographics. From SafeGraph data, each POI  $p_j$  is similarly labeled with its  
351 category (e.g., restaurant, grocery store, or religious organization), its physical size in square feet  
352  $a_{p_j}$ , and the median dwell time  $d_{p_j}$  of visitors to  $p_j$ .

353 The central technical challenge in constructing this network is estimating the network weights  
354  $W^{(t)} = \{w_{ij}^{(t)}\}$  from SafeGraph data, since this visit matrix is not directly available from the data.  
355 Because the estimation procedure is involved, we defer describing it in detail until Methods M7;  
356 in Methods M3–M6, we will assume that we already have the network weights.

## 357 **M3 Model dynamics**

358 To model the spread of SARS-CoV-2, we overlay a metapopulation disease transmission model on  
359 the mobility network defined in Methods M2. The transmission model structure follows prior work  
360 on epidemiological models of SARS-CoV-2<sup>15,22</sup> but incorporates a fine-grained mobility network  
361 into the calculations of the transmission rate (Methods M3.1). We construct separate mobility  
362 networks and models for each metropolitan statistical area (MSA).

363 We use a SEIR model with susceptible ( $S$ ), exposed ( $E$ ), infectious ( $I$ ), and removed ( $R$ )  
364 compartments. Susceptible individuals have never been infected, but can acquire the virus through

365 contact with infectious individuals, which may happen at POIs or in their home CBG. They then  
 366 enter the exposed state, during which they have been infected but are not infectious yet. Individuals  
 367 transition from exposed to infectious at a rate inversely proportional to the mean latency period.  
 368 Finally, they transition into the removed state at a rate inversely proportional to the mean infectious  
 369 period. The removed state represents individuals who cannot infect others, because they have  
 370 recovered, self-isolated, or died.

371 Each CBG  $c_i$  maintains its own SEIR instantiation, with  $S_{c_i}^{(t)}$ ,  $E_{c_i}^{(t)}$ ,  $I_{c_i}^{(t)}$ , and  $R_{c_i}^{(t)}$  representing  
 372 how many individuals in CBG  $c_i$  are in each disease state at hour  $t$ , and  $N_{c_i} = S_{c_i}^{(t)} + E_{c_i}^{(t)} + I_{c_i}^{(t)} +$   
 373  $R_{c_i}^{(t)}$ . At each hour  $t$ , we sample the transitions between states as follows:

$$N_{S_{c_i}^{(t)} \rightarrow E_{c_i}^{(t)}} \sim \text{Pois} \left( \frac{S_{c_i}^{(t)}}{N_{c_i}} \sum_{j=1}^n \lambda_{p_j}^{(t)} w_{ij}^{(t)} \right) + \text{Binom} \left( S_{c_i}^{(t)}, \lambda_{c_i}^{(t)} \right) \quad (1)$$

$$N_{E_{c_i}^{(t)} \rightarrow I_{c_i}^{(t)}} \sim \text{Binom} \left( E_{c_i}^{(t)}, 1/\delta_E \right) \quad (2)$$

$$N_{I_{c_i}^{(t)} \rightarrow R_{c_i}^{(t)}} \sim \text{Binom} \left( I_{c_i}^{(t)}, 1/\delta_I \right), \quad (3)$$

374 where  $\lambda_{p_j}^{(t)}$  is the rate of infection at POI  $p_j$  at time  $t$ ;  $w_{ij}^{(t)}$ , the  $ij$ -th entry of the visit matrix from  
 375 the mobility network (Methods M2), is the number of visitors from CBG  $c_i$  to POI  $p_j$  at time  $t$ ;  
 376  $\lambda_{c_i}^{(t)}$  is the base rate of infection that is independent of visiting POIs;  $\delta_E$  is the mean latency period;  
 377 and  $\delta_I$  is the mean infectious period.

378 We then update each state to reflect these transitions. Let  $\Delta S_{c_i}^{(t)} := S_{c_i}^{(t+1)} - S_{c_i}^{(t)}$ , and likewise  
 379 for  $\Delta E_{c_i}^{(t)}$ ,  $\Delta I_{c_i}^{(t)}$ , and  $\Delta R_{c_i}^{(t)}$ . Then,

$$\Delta S_{c_i}^{(t)} := -N_{S_{c_i}^{(t)} \rightarrow E_{c_i}^{(t)}} \quad (4)$$

$$\Delta E_{c_i}^{(t)} := N_{S_{c_i}^{(t)} \rightarrow E_{c_i}^{(t)}} - N_{E_{c_i}^{(t)} \rightarrow I_{c_i}^{(t)}} \quad (5)$$

$$\Delta I_{c_i}^{(t)} := N_{E_{c_i}^{(t)} \rightarrow I_{c_i}^{(t)}} - N_{I_{c_i}^{(t)} \rightarrow R_{c_i}^{(t)}} \quad (6)$$

$$\Delta R_{c_i}^{(t)} := N_{I_{c_i}^{(t)} \rightarrow R_{c_i}^{(t)}}. \quad (7)$$

### 380 M3.1 The number of new exposures $N_{S_{c_i}^{(t)} \rightarrow E_{c_i}^{(t)}}$

381 We separate the number of new exposures  $N_{S_{c_i}^{(t)} \rightarrow E_{c_i}^{(t)}}$  in CBG  $c_i$  at time  $t$  into two parts: cases  
 382 from visiting POIs, which are sampled from  $\text{Pois} \left( \sum_{j=1}^n \lambda_{p_j}^{(t)} w_{ij}^{(t)} \right)$ , and other cases not captured by  
 383 visiting POIs, which are sampled from  $\text{Binom} \left( S_{c_i}^{(t)}, \lambda_{c_i}^{(t)} \right)$ .

384 **New exposures from visiting POIs.** We assume that any susceptible visitor to POI  $p_j$  at time  $t$   
 385 has the same independent probability  $\lambda_{p_j}^{(t)}$  of being infected and transitioning from the susceptible  
 386 ( $S$ ) to the exposed ( $E$ ) state. Since there are  $w_{ij}^{(t)}$  visitors from CBG  $c_i$  to POI  $p_j$  at time  $t$ , and  
 387 we assume that a  $S_{c_i}^{(t)}/N_{c_i}$  fraction of them are susceptible, the number of new exposures among  
 388 these visitors is distributed as  $\text{Binom}(w_{ij}^{(t)} S_{c_i}^{(t)}/N_{c_i}, \lambda_{p_j}^{(t)}) \approx \text{Pois}(\lambda_{p_j}^{(t)} w_{ij}^{(t)} S_{c_i}^{(t)}/N_{c_i})$ . The number of  
 389 new exposures among all outgoing visitors from CBG  $c_i$  is therefore distributed as the sum of the  
 390 above expression over all POIs,  $\text{Pois}((S_{c_i}^{(t)}/N_{c_i}) \sum_{j=1}^n \lambda_{p_j}^{(t)} w_{ij}^{(t)})$ .

391 We model the infection rate at POI  $p_j$  at time  $t$ ,  $\lambda_{p_j}^{(t)} := \beta_{p_j}^{(t)} \cdot I_{p_j}^{(t)}/V_{p_j}^{(t)}$ , as the product of its  
 392 transmission rate  $\beta_{p_j}^{(t)}$  and proportion of infectious individuals  $I_{p_j}^{(t)}/V_{p_j}^{(t)}$ , where  $V_{p_j}^{(t)} := \sum_{i=1}^m w_{ij}^{(t)}$   
 393 is the total number of visitors to  $p_j$  at time  $t$ ,

394 We model the transmission rate at POI  $p_j$  at time  $t$  as

$$\beta_{p_j}^{(t)} := \psi \cdot d_{p_j}^2 \cdot \frac{V_{p_j}^{(t)}}{a_{p_j}}, \quad (8)$$

395 where  $a_{p_j}$  is the physical area of  $p_j$ , and  $\psi$  is a transmission constant (shared across all POIs) that  
 396 we fit to data. The inverse scaling of transmission rate with area  $a_{p_j}$  is a standard simplifying  
 397 assumption.<sup>42</sup> The dwell time fraction  $d_{p_j} \in [0, 1]$  is what fraction of an hour an average visitor to  
 398  $p_j$  at any hour will spend there (Methods M7.1); it has a quadratic effect on the POI transmission  
 399 rate  $\beta_{p_j}^{(t)}$  because it reduces both (1) the time that a susceptible visitor spends at  $p_j$  and (2) the  
 400 density of visitors at  $p_j$ .

401 With this expression for the transmission rate  $\beta_{p_j}^{(t)}$ , we can calculate the infection rate at POI  
 402  $p_j$  at time  $t$  as

$$\begin{aligned} \lambda_{p_j}^{(t)} &= \beta_{p_j}^{(t)} \cdot \frac{I_{p_j}^{(t)}}{V_{p_j}^{(t)}} \\ &= \psi \cdot d_{p_j}^2 \cdot \frac{I_{p_j}^{(t)}}{a_{p_j}}. \end{aligned} \quad (9)$$

403 For sufficiently large values of  $\psi$  and a sufficiently large proportion of infected individuals, the  
 404 expression above can sometimes exceed 1. To address this, we simply clip the infection rate to 1.  
 405 However, this occurs very rarely for the parameter settings and simulation duration that we use.

406 Finally, to compute the number of infectious individuals at  $p_j$  at time  $t$ ,  $I_{p_j}^{(t)}$ , we assume that  
 407 the proportion of infectious individuals among the  $w_{kj}^{(t)}$  visitors to  $p_j$  from a CBG  $c_k$  mirrors the

408 overall density of infections  $I_{c_k}^{(t)}/N_{c_k}$  in that CBG, although we note that the scaling factor  $\psi$  can  
 409 account for differences in the ratio of infectious individuals who visit POIs. This gives

$$I_{p_j}^{(t)} := \sum_{k=1}^m \frac{I_{c_k}^{(t)}}{N_{c_k}} w_{kj}^{(t)}. \quad (10)$$

410 **Base rate of new exposures not captured by visiting POIs.** In addition to the new exposures  
 411 from infections at POIs, we model a CBG-specific base rate of new exposures that is independent of  
 412 POI visit activity. This captures other sources of infections, e.g., household infections or infections  
 413 at POIs that are absent from the SafeGraph data. We assume that at each hour, every susceptible  
 414 individual in CBG  $c_i$  has a  $\lambda_{c_i}^{(t)}$  probability of becoming infected and transitioning to the exposed  
 415 state, where

$$\lambda_{c_i}^{(t)} := \beta_{\text{base}} \cdot \frac{I_{c_i}^{(t)}}{N_{c_i}} \quad (11)$$

416 is proportional to the infection density at CBG  $c_i$ , and  $\beta_{\text{base}}$  is a constant that we fit to data.

417 **Overall number of new exposures.** Putting all of the above together yields the expression for  
 418 the distribution of new exposures in CBG  $c_i$  at time  $t$ ,

$$\begin{aligned} N_{S_{c_i} \rightarrow E_{c_i}}^{(t)} &\sim \text{Pois} \left( \frac{S_{c_i}^{(t)}}{N_{c_i}} \sum_{j=1}^n \lambda_{p_j}^{(t)} w_{ij}^{(t)} \right) + \text{Binom} \left( S_{c_i}^{(t)}, \lambda_{c_i}^{(t)} \right) \\ &= \underbrace{\text{Pois} \left( \psi \cdot \frac{S_{c_i}^{(t)}}{N_{c_i}} \cdot \sum_{j=1}^n \frac{d_{p_j}^2}{a_{p_j}} \left( \sum_{k=1}^m \frac{I_{c_k}^{(t)}}{N_{c_k}} w_{kj}^{(t)} \right) w_{ij}^{(t)} \right)}_{\text{new infections from visiting POIs}} + \underbrace{\text{Binom} \left( S_{c_i}^{(t)}, \beta_{\text{base}} \cdot \frac{I_{c_i}^{(t)}}{N_{c_i}} \right)}_{\text{base rate of new CBG infections}}. \end{aligned} \quad (12)$$

### 419 **M3.2 The number of new infectious and removed cases**

420 We model exposed individuals as becoming infectious at a rate inversely proportional to the mean  
 421 latency period  $\delta_E$ . At each time step  $t$ , we assume that each exposed individual has a constant,  
 422 time-independent probability of becoming infectious, with

$$N_{E_{c_i} \rightarrow I_{c_i}}^{(t)} \sim \text{Binom} \left( E_{c_i}^{(t)}, 1/\delta_E \right). \quad (13)$$

423 Similarly, we model infectious individuals as transitioning to the removed state at a rate inversely  
424 proportional to the mean infectious period  $\delta_I$ , with

$$N_{I_{c_i} \rightarrow R_{c_i}}^{(t)} \sim \text{Binom}\left(I_{c_i}^{(t)}, 1/\delta_I\right), \quad (14)$$

425 We estimate both  $\delta_E$  and  $\delta_I$  from prior literature; see Methods [M4](#).

### 426 **M3.3 Model initialization**

427 In our experiments,  $t = 0$  is the first hour of March 1, 2020. We approximate the infectious  $I$  and  
428 removed  $R$  compartments at  $t = 0$  as initially empty, with all infected individuals in the exposed  
429  $E$  compartment. We further assume the same expected initial prevalence  $p_0$  in every CBG  $c_i$ . At  
430  $t = 0$ , every individual in the MSA has the same independent probability  $p_0$  of being exposed  $E$   
431 instead of susceptible  $S$ . We thus initialize the model state by setting

$$S_{c_i}^{(0)} = N_{c_i} - E_{c_i}^{(0)} \quad (15)$$

$$E_{c_i}^{(0)} \sim \text{Binom}(N_{c_i}, p_0) \quad (16)$$

$$I_{c_i}^{(0)} = 0 \quad (17)$$

$$R_{c_i}^{(0)} = 0. \quad (18)$$

## 432 **M4 Model calibration and validation**

433 Most of our model parameters can either be estimated from SafeGraph and US Census data, or  
434 taken from prior work (see Extended Data Table [2](#) for a summary). This leaves 3 model parameters  
435 that do not have direct analogues in the literature, and that we therefore need to calibrate with data:

- 436 1. The transmission constant in POIs,  $\psi$  (Equation [\(9\)](#))
- 437 2. The base transmission rate,  $\beta_{\text{base}}$  (Equation [\(11\)](#))
- 438 3. The initial proportion of exposed individuals at time  $t = 0$ ,  $p_0$  (Equation [\(16\)](#)).

439 In this section, we describe how we fit these parameters to published numbers of confirmed cases,  
440 as reported by *The New York Times*. We fit models for each MSA separately. In Methods [M4.4](#),  
441 we show that the resulting models can accurately predict the number of confirmed cases in out-of-  
442 sample data that was not used for model fitting.

## 443 M4.1 Selecting parameter ranges

444 **Transmission rate factors  $\psi$  and  $\beta_{\text{base}}$ .** We select parameter ranges for the transmission rate fac-  
445 tors  $\psi$  and  $\beta_{\text{base}}$  by checking if the model outputs match plausible ranges of the basic reproduction  
446 number  $R_0$  pre-lockdown, since  $R_0$  has been the study of substantial prior work on SARS-CoV-  
447 2.<sup>58</sup> Under our model, we can decompose  $R_0 = R_{\text{base}} + R_{\text{POI}}$ , where  $R_{\text{POI}}$  describes transmission  
448 due to POIs and  $R_{\text{base}}$  describes the remaining transmission (as in Equation (12)). We first establish  
449 plausible ranges for  $R_{\text{base}}$  and  $R_{\text{POI}}$  before translating these into plausible ranges for  $\beta_{\text{base}}$  and  $\psi$ .

450 We assume that  $R_{\text{base}}$  ranges from 0.1–2.  $R_{\text{base}}$  models transmission that is not correlated  
451 with activity at POIs in the SafeGraph dataset, including within-household transmission and trans-  
452 mission at POI categories (like subways or nursing homes) which are not well-captured in the  
453 SafeGraph dataset. We chose the lower limit of 0.1 because beyond that point, base transmis-  
454 sion would only contribute minimally to overall  $R$ , whereas previous work suggests that within-  
455 household transmission is a substantial contributor to overall transmission.<sup>59–61</sup> Household trans-  
456 mission alone is not estimated to be sufficient to tip overall  $R_0$  above 1; for example, a single  
457 infected individual has been estimated to cause an average of 0.32 (0.22, 0.42) secondary within-  
458 household infections.<sup>59</sup> However, because  $R_{\text{base}}$  may also capture transmission at POIs not cap-  
459 tured in the SafeGraph dataset, to be conservative, we chose an upper limit of  $R_{\text{base}} = 2$ ; as we  
460 describe below, the best-fit models for all 10 MSAs have  $R_{\text{base}} < 2$ , and 9 out of 10 have  $R_{\text{base}} < 1$ .  
461 We allow  $R_{\text{POI}}$  to range from 1–3, which corresponds to allowing  $R_0 = R_{\text{POI}} + R_{\text{base}}$  to range from  
462 1.1–5. This is a conservatively wide range, since prior work estimates a pre-lockdown  $R_0$  of 2–3.<sup>58</sup>

463 To determine the values of  $R_{\text{base}}$  and  $R_{\text{POI}}$  that a given pair of  $\beta_{\text{base}}$  and  $\psi$  imply, we seeded a  
464 fraction of index cases and then ran the model on looped mobility data from the first week of March  
465 to capture pre-lockdown conditions. We initialized the model by setting  $p_0$ , the initial proportion  
466 of exposed individuals at time  $t = 0$ , to  $p_0 = 10^{-4}$ , and then sampling in accordance with Equation  
467 (16). Let  $N_0$  be the number of initial exposed individuals sampled. We computed the number of  
468 individuals that these  $N_0$  index cases went on to infect through base transmission,  $N_{\text{base}}$ , and POI  
469 transmission,  $N_{\text{POI}}$ , which gives

$$R_{\text{POI}} = \frac{N_{\text{POI}}}{N_0} \quad (19)$$

$$R_{\text{base}} = \frac{N_{\text{base}}}{N_0}. \quad (20)$$



470 We averaged these quantities over stochastic realizations for each MSA. Figure S2 shows that, as  
 471 expected,  $R_{\text{base}}$  is linear in  $\beta_{\text{base}}$  and  $R_{\text{POI}}$  is linear in  $\psi$ .  $R_{\text{base}}$  lies in the plausible range when  
 472  $\beta_{\text{base}}$  ranges from 0.0012–0.024, and  $R_{\text{POI}}$  lies in the plausible range (for at least one MSA) when  
 473  $\psi$  ranges from 515–4,886, so these are the parameter ranges we consider when fitting the model.  
 474 As described in Methods M4.2, we verified that case count data for all MSAs can be fit using  
 475 parameter settings for  $\beta_{\text{base}}$  and  $\psi$  within these ranges.

476 **Initial prevalence of exposures,  $p_0$ .** The extent to which SARS-CoV-2 infections had spread in  
 477 the U.S. by the start of our simulation (March 1, 2020) is currently unclear.<sup>62</sup> To account for this  
 478 uncertainty, we allow  $p_0$  to vary across a large range between  $10^{-5}$  and  $10^{-2}$ . As described in  
 479 Methods M4.2, we verified that case count data for all MSAs can be fit using parameter settings  
 480 for  $p_0$  within this range.

## 481 M4.2 Fitting to the number of confirmed cases

482 Using the parameter ranges above, we grid searched over  $\psi$ ,  $\beta_{\text{base}}$ , and  $p_0$  to find the models that  
 483 best fit the number of confirmed cases reported by *The New York Times* (NYT).<sup>35</sup> For each of the 10  
 484 MSAs studied, we tested 1,500 different combinations of  $\psi$ ,  $\beta_{\text{base}}$ , and  $p_0$  in the parameter ranges  
 485 specified above, with parameters linearly spaced for  $\psi$  and  $\beta_{\text{base}}$  and logarithmically spread for  $p_0$ .

486 In Methods M3, we directly model the number of infections but not the number of confirmed  
 487 cases. To estimate the number of confirmed cases, we assume that an  $r_c = 0.1$  proportion of  
 488 infections will be confirmed, and moreover that they will be confirmed exactly  $\delta_c = 168$  hours (7  
 489 days) after becoming infectious; these parameters are estimated from prior work (Extended Data  
 490 Table 2). From these assumptions, we can calculate the predicted number of newly confirmed  
 491 cases across all CBGs in the MSA on day  $d$ ,

$$N_{\text{cases}}^{(\text{day } d)} = r_c \cdot \sum_{i=1}^m \sum_{\tau=24(d-1)+1-\delta_c}^{24d-\delta_c} N_{E_{c_i} \rightarrow I_{c_i}}^{(\tau)}, \quad (21)$$

492 where  $m$  indicates the total number of CBGs in the MSA and for convenience we define  $N_{E_{c_i} \rightarrow I_{c_i}}^{(\tau)}$ ,  
 493 the number of newly infectious people at hour  $\tau$ , to be 0 when  $\tau < 1$ .

494 From NYT data, we have the reported number of new cases  $\hat{N}_{\text{cases}}^{(\text{day } d)}$  for each day  $d$ , summed  
 495 over each county in the MSA. We compare the reported number of cases and the number of cases  
 496 that our model predicts by computing the root-mean-squared-error (RMSE) between each of the

497  $D = \lfloor T/24 \rfloor$  days of our simulations,

$$\text{RMSE} = \sqrt{\frac{1}{D} \sum_{d=1}^D \left( N_{\text{cases}}^{(\text{day } d)} - \hat{N}_{\text{cases}}^{(\text{day } d)} \right)^2}. \quad (22)$$

498 For each combination of model parameters and for each MSA, we quantify model fit with the  
499 NYT data by running 30 stochastic realizations and averaging their RMSE. Note that we measure  
500 model fit based on the daily number of new reported cases (as opposed to the cumulative number  
501 of reported cases).<sup>63</sup>

502 Our simulation spans March 1 to May 2, 2020, and we use mobility data from that period.  
503 However, because we assume that cases will be confirmed  $\delta_c = 7$  days after individuals become  
504 infectious (Extended Data Table 2), we predict the number of cases with a 7 day offset, from March  
505 8 to May 9, 2020.

### 506 **M4.3 Parameter selection and uncertainty quantification**

507 Throughout this paper, we report aggregate predictions from different parameter sets of  $\psi, \beta_{\text{base}}$ ,  
508 and  $p_0$  and multiple stochastic realizations. For each MSA, we:

- 509 1. Find the best-fit parameter set, i.e., with the lowest average RMSE over stochastic realiza-  
510 tions.
- 511 2. Select all parameter sets that achieve an RMSE (averaged over stochastic realizations) within  
512 20% of the RMSE of the best-fit parameter set.
- 513 3. Pool together all predictions across those parameter sets and all of their stochastic realiza-  
514 tions, and report their mean and 2.5th/97.5th percentiles.

515 On average, each MSA has 9.7 parameter sets that achieve an RMSE within 20% of the best-fitting  
516 parameter set (Table S8). For each parameter set, we have results for 30 stochastic realizations. All  
517 uncertainty intervals in our results show the 2.5th/97.5th percentiles across these pooled results.

518 This procedure corresponds to rejection sampling in an Approximate Bayesian Computation  
519 framework,<sup>15</sup> where we assume an error model that is Gaussian with constant variance; we pick an  
520 acceptance threshold based on what the best-fit model achieves; and we use a uniform parameter  
521 grid instead of sampling from a uniform prior. It quantifies uncertainty from two sources. First, the  
522 multiple realizations capture stochastic variability between model runs with the same parameters.

523 Second, simulating with all parameter sets that are within 20% of the RMSE of the best fit captures  
524 uncertainty in the model parameters  $\psi$ ,  $\beta_{\text{base}}$ , and  $p_0$ . The latter is equivalent to assuming that the  
525 posterior probability over the true parameters is uniformly spread among all parameter sets within  
526 the 20% threshold.

#### 527 **M4.4 Model validation on out-of-sample cases**

528 We validate our models by showing that they predict the number of confirmed cases on out-of-  
529 sample data when we have access to corresponding mobility data. For each MSA, we split the  
530 available NYT dataset into a training set (spanning March 8, 2020 to April 14, 2020) and a test  
531 set (spanning April 15, 2020 to May 9, 2020). We fit the model parameters  $\psi$ ,  $\beta_{\text{base}}$ , and  $p_0$ ,  
532 as described in Methods [M4.2](#), but only using the training set. We then evaluate the predictive  
533 accuracy of the resulting model on the test set. When running our models on the test set, we  
534 still use mobility data from the test period. Thus, this is an evaluation of whether the models can  
535 accurately predict the number of cases, given mobility data, in a time period that was not used  
536 for model calibration. Extended Data Figure [1a](#) shows that the models fit the out-of-sample case  
537 data fairly well, demonstrating that they can extrapolate beyond the training set to future time  
538 periods. Note that we only use this train/test split to evaluate out-of-sample model accuracy. All  
539 other results are generated using parameter sets that best fit the *entire* dataset, as described in  
540 Methods [M4.2](#).

### 541 **M5 Sensitivity analyses and robustness checks**

#### 542 **M5.1 Aggregate mobility and no-mobility baseline models**

543 **Comparison to aggregate mobility model.** Our model uses a detailed mobility network to sim-  
544 ulate disease spread. To test if this detailed model is necessary, or if our model is simply making  
545 use of aggregate mobility patterns, we tested an alternate SEIR model that uses the aggregate num-  
546 ber of visits made to any POI in the MSA in each hour, but not the breakdown of visits between  
547 specific CBGs to specific POIs. Like our model, the aggregate mobility model also captures trans-  
548 mission due to POI visits and mixing within CBGs; thus, the two models have the same three free  
549 parameters ( $\psi$ , scaling transmission rates at POIs;  $\beta_{\text{base}}$ , scaling transmission rates at CBGs; and  
550  $p_0$ , the initial fraction of infected individuals).

551 As in our network model, transmission under the aggregate mobility model happens at POIs  
552 and at CBGs. For POI transmission, we take the probability that a susceptible person (from any

553 CBG) will become infected due to a POI visit at time  $t$  as equal to

$$\lambda_{POI}^{(t)} = \psi \cdot \underbrace{\frac{\sum_{i=1}^m \sum_{j=1}^n w_{ij}^{(t)}}{nm}}_{\text{average mobility at time } t} \cdot \frac{I^{(t)}}{N}, \quad (23)$$

554 where  $m$  is the number of CBGs,  $n$  is the number of POIs,  $I^{(t)}$  is the total number of infectious  
 555 individuals at time  $t$ , and  $N$  is the total population size of the MSA. For CBG transmission, we  
 556 assume the same process as in our network model: the probability  $\lambda_{c_i}^{(t)}$  that a susceptible person in  
 557 CBG  $c_i$  will become infected in their CBG in time  $t$  is equal to  $\beta_{\text{base}}$  times the current infectious  
 558 fraction of  $c_i$  (Equation 11). Putting it together, the aggregate mobility model defines the number  
 559 of new exposures in CBG  $c_i$  at time  $t$  as

$$N_{S_{c_i} \rightarrow E_{c_i}}^{(t)} \sim \underbrace{\text{Binom}\left(S_{c_i}^{(t)}, \lambda_{POI}^{(t)}\right)}_{\text{new infections from visiting POIs}} + \underbrace{\text{Binom}\left(S_{c_i}^{(t)}, \lambda_{c_i}^{(t)}\right)}_{\text{base rate of new CBG infections}}. \quad (24)$$

560 All other dynamics are the same between the aggregate mobility model and our network model, as  
 561 described in Methods M3. We determined parameter ranges and calibrated the aggregate mobility  
 562 model in the exact same way as we did for our network model, as described in Methods M4.  
 563 As discussed in the main text, we found that our network model substantially outperformed the  
 564 aggregate mobility model in out-of-sample cases prediction (Extended Data Figure 1).

565 **Comparison to baseline that does not use mobility data.** To determine the extent to which  
 566 mobility data might aid in modeling the case trajectory, we also compared our model to a baseline  
 567 SEIR model that does not use mobility data and simply assumes that all individuals within an MSA  
 568 mix uniformly. In this no-mobility baseline, an individual's risk of being infected and transitioning  
 569 to the exposed state at time  $t$  is

$$\lambda^{(t)} := \beta_{\text{base}} \cdot \frac{I^{(t)}}{N}, \quad (25)$$

570 where  $I^{(t)}$  is the total number of infectious individuals at time  $t$ , and  $N$  is the total population  
 571 size of the MSA. As above, the other model dynamics are identical, and for model calibration we  
 572 performed a similar grid search over  $\beta_{\text{base}}$  and  $p_0$ . As expected, we found both the network and  
 573 aggregate mobility models outperformed the no-mobility model on out-of-sample case predictions

574 (Extended Data Figure 1).

## 575 **M5.2 Modifying the parametric form for POI transmission rates**

576 Recall from Methods M3, Equation (8), that in our model, the transmission rate at a POI  $p_j$  at an  
577 hour  $t$ ,

$$\beta_{p_j}^{(t)} := \psi \cdot d_{p_j}^2 \cdot \frac{V_{p_j}^{(t)}}{a_{p_j}}, \quad (26)$$

578 depends on two key ingredients:  $d_{p_j}^2$ , which reflects how much time visitors spend there, and  
579  $V_{p_j}^{(t)}/a_{p_j}$ , which reflects the density (number of visitors per sq ft) of the POI in that hour. These  
580 assumptions are based on prior expectations that a visit is more dangerous for a susceptible indi-  
581 vidual if they spend more time there and/or if the place is more crowded. To assess empirically the  
582 role that each of these two terms play, we compared our transmission rate formula to two perturbed  
583 versions of it: one that removed the dwell time term, and another that removed the density term.  
584 For each of these formulas, we computed the risk of visiting a POI category as the average trans-  
585 mission rate of the category, with the rate of each POI weighted by the proportion of category visits  
586 that went to that POI. Then, we evaluated whether the relative risks predicted by each formula con-  
587 corded with the rankings of POI categories proposed by independent epidemiological experts.<sup>64,65</sup>  
588 In our evaluations, we included all of the categories that we analyzed (i.e., the 20 categories with  
589 the most visits in SafeGraph data; see Section M6) that overlapped with categories described in  
590 the external rankings. To compare against Emanuel et al.<sup>64</sup>, we also converted their categorical  
591 groupings into numerical score, i.e., “Low”  $\rightarrow$  1, “Low/Medium”  $\rightarrow$  2, etc., up to “High”  $\rightarrow$  5.  
592 Sims et al.<sup>65</sup> already provided numerical ratings so we did not have to perform a conversion.

593 As shown in Figure S5, we find that the predicted relative risks match external sources best  
594 when we use our original parametric form that accounts for both dwell time and density: restau-  
595 rants, cafes, religious organizations, and gyms are among the most dangerous, while grocery stores  
596 and retail (e.g., clothing stores) are less dangerous. However, when we assume only dwell time  
597 matters and remove the density term, we see unrealistic changes in the ranking: e.g., restaurants  
598 drop close to grocery stores, despite both sets of experts deeming them far apart in terms of risk.  
599 When we assume only density matters and remove dwell time, we also see unrealistic changes:  
600 e.g., limited-service restaurants are predicted to be far riskier than full-service restaurants, and  
601 gyms and religious organizations are no longer predicted as risky, which contradicts both of our

602 sources. These findings demonstrate that both factors — the dwell time and density — are impor-  
603 tant toward faithfully modeling transmission at POIs, since the predictions become less realistic  
604 when either factor is taken out.

### 605 **M5.3 Parameter identifiability**

606 We assess the identifiability of the fitted model parameters  $\psi$ ,  $\beta_{\text{base}}$ , and  $p_0$  as follows. First, we  
607 verify that the model-fitting procedure is able to recover the true parameters when fit on simulated  
608 data for which the true parameters are known. For each MSA, we simulate daily case counts using  
609 the best-fit parameters for that MSA (i.e., those with the minimum RMSE to daily case counts, as  
610 reported in Table S8). We then run our grid search fitting procedure on the simulated case counts.  
611 For all 10 MSAs, as Figure S8 illustrates, the parameters in our grid search that obtain the lowest  
612 RMSE on the simulated data are always the true parameters that were used to generate that data.  
613 This demonstrates that our model and fitting procedure can correctly recover the true parameters  
614 on simulated data.

615 As a further assessment of model identifiability, in Figure S9 we plot RMSE on true (not  
616 simulated) daily case counts (that is, the metric used to perform model calibration) as a function  
617 of model parameters  $\beta_{\text{base}}$  and  $\psi$ . (We take the minimum RMSE over values of  $p_0$  so the plots can  
618 be visualized in two dimensions.) As these plots illustrate,  $\beta_{\text{base}}$  and  $\psi$  are correlated, which is un-  
619 surprising because they scale the growth of infections at CBGs and POIs respectively. We account  
620 for the uncertainty caused by this correlation throughout the analysis, by aggregating results from  
621 all parameter settings which achieve an RMSE within 20% of the best-fit model for each MSA, as  
622 described in Section M4.3.

### 623 **M5.4 Stochastic sampling of cases**

624 Instead of assuming that a fixed proportion of infections are confirmed after a fixed confirmation  
625 delay, we also tried stochastically sampling the number of confirmed cases and the confirmation  
626 delay. For each day  $d$ , we first computed  $N_{E_{c_i} \rightarrow I_{c_i}}^{(d)}$ , the number of people who became infectious  
627 on this day; we then sampled from  $\text{Binom}(N_{E_{c_i} \rightarrow I_{c_i}}^{(d)}, r_c)$  to get the number of confirmed cases that  
628 would result from this group of infections. For each case that was to be confirmed, we drew its  
629 confirmation delay – i.e., delay from becoming infectious to being confirmed – from distributions  
630 fitted on empirical line-list data: either  $\text{Gamma}(1.85, 3.57)$ <sup>22</sup> or  $\text{Exp}(6.1)$ .<sup>43</sup>

631 We found that our model predictions barely changed when we sampled case trajectories

632 stochastically using either delay distribution, as opposed to assuming a fixed confirmation rate and  
633 delay (Figure S4). However, an advantage of our fixed method is that it allows us to predict con-  
634 firmed cases up to  $\delta_c$  (i.e., 7) days after the last day of simulation, whereas we cannot do the same  
635 when we sample confirmed cases and delays stochastically. This is because, if delays are stochas-  
636 tic, predicting the number of confirmed cases on, for example, the 5<sup>th</sup> day after the simulation ends  
637 depends on the number of newly infectious individuals every day before and including that day,  
638 but since the simulation ended days before, the model would not have sufficient information to  
639 make the prediction. On the other hand, the fixed method simply translates and scales the newly  
640 infectious curve, so we can predict the number of confirmed cases 5 days after the simulation  
641 ends, since it only depends on the number of newly infectious individuals 2 days before the end of  
642 simulation. Due to this advantage, we opted to use the fixed method, as described in Methods M4.

## 643 **M5.5 Model calibration metrics**

644 Finally, we tested three alternative model calibration procedures using different metrics for mea-  
645 suring when to accept or reject a model parameter setting. For each procedure, we recomputed our  
646 downstream analyses and verified that our key results on superspreader POIs (Extended Data Fig-  
647 ure 3), the effects of reopening (Figure S6), and group disparities (Figure 3) all remained similar.

648 **Poisson likelihood model.** Our model calibration procedure, which uses RMSE to assess fit,  
649 implicitly assumes that error in the number of observed cases is drawn from a normal (Gaussian)  
650 distribution. As a sensitivity analysis, we tested a Poisson error model instead, using negative  
651 log-likelihood as a measure of fit, and using the same 20% threshold for model calibration as in  
652 Methods M4. We note that the homoscedastic Gaussian model will likely prioritize fitting parts  
653 of the case trajectory that have higher case counts, whereas a Poisson model will comparatively  
654 prioritize fitting parts of the case trajectory with lower case counts. We found that ranking models  
655 via Poisson likelihood was consistent with ranking models using RMSE (both computed on daily  
656 incident cases, as described above): the median Spearman correlation over MSAs between models  
657 ranked by Poisson likelihood vs. RMSE was 0.97.

658 **Model acceptance threshold.** As described in Methods M4, we set the acceptance threshold for  
659 model calibration (i.e., the threshold for rejection sampling in the Approximate Bayesian Compu-  
660 tation framework) to 20% of the RMSE of the best-fit model. We selected this threshold because

661 beyond that point, model fit qualitatively deteriorated based on inspection of the case trajectories.  
662 As a sensitivity analysis, we selected a different threshold (10%), corresponding to selecting a  
663 subset of the models that had a better fit, and verified that the key results remained similar.

664 **Fitting to deaths.** In addition to the number of confirmed cases, the NYT data also contains the  
665 daily reported number of deaths due to COVID-19 by county. As an additional sensitivity analysis,  
666 we calibrated our models to fit this death data instead of case data. To estimate the number of  
667 deaths  $N_{\text{deaths}}$ , we use a similar process as for the number of cases  $N_{\text{cases}}$ , except that we replace  $r_c$   
668 with  $r_d = 0.66\%$ , the estimated infection fatality rate for COVID-19,<sup>66</sup> and  $\delta_c$  with  $\delta_d = 432$  hours  
669 (18 days), the number of days between becoming infectious and dying<sup>66</sup> (Extended Data Table 2  
670 provides references for all parameters). This gives

$$N_{\text{deaths}}^{(d)} = r_d \cdot \sum_{i=1}^m \sum_{\tau=24(d-1)+1-\delta_d}^{24d-\delta_d} N_{E_{c_i} \rightarrow I_{c_i}}^{(\tau)}. \quad (27)$$

671 Because we assume that deaths occur  $\delta_d = 18$  days after individuals become infectious, we com-  
672 pared with NYT death data starting on March 19, 2020 (18 days after our simulation begins).  
673 Extended Data Figure 2 shows that while the daily death data is noisy, the calibrated models can  
674 also fit the trends in the death counts well. Ranking models using RMSE on deaths was consistent  
675 with ranking models using RMSE on cases, with a median Spearman correlation over MSAs of  
676 0.99, and as with the above sensitivity analyses (changing the likelihood model and the acceptance  
677 threshold), we found that our key results remained similar.

## 678 **M6 Analysis details**

679 In this section, we include additional details about the experiments underlying the figures in the  
680 paper. We omit explanations for figures that are completely described in the main text.

681 **Comparing the magnitude vs. timing of mobility reduction (Figure 2a).** To simulate what  
682 would have happened if we changed the magnitude or timing of mobility reduction, we modify the  
683 real mobility networks from March 1–May 2, 2020, and then run our models on the hypothetical  
684 data. In Figure 2a, we report the cumulative incidence proportion at the end of the simulation (May  
685 2, 2020), i.e., the total fraction of people in the exposed, infectious, and removed states at that time.

686 To simulate a smaller magnitude of mobility reduction, we interpolate between the mobility



687 network from the first week of simulation (March 1–7, 2020), which we use to represent typical  
 688 mobility levels (prior to mobility reduction measures), and the actual observed mobility network  
 689 for each week. Let  $W^{(t)}$  represent the observed visit matrix at the  $t$ -th hour of simulation, and let  
 690  $f(t) = t \bmod 168$  map  $t$  to its corresponding hour in the first week of simulation, since there are  
 691 168 hours in a week. To represent the scenario where people had committed to  $\alpha \in [0, 1]$  times  
 692 the actual observed reduction in mobility, we construct a visit matrix  $\tilde{W}_\alpha^{(t)}$  that is an  $\alpha$ -convex  
 693 combination of  $W^{(t)}$  and  $W^{f(t)}$ ,

$$\tilde{W}_\alpha^{(t)} := \alpha W^{(t)} + (1 - \alpha) W^{f(t)}. \quad (28)$$

694 If  $\alpha$  is 1, then  $\tilde{W}_\alpha^{(t)} = W^{(t)}$ , and we use the actual observed mobility network for the simulation.  
 695 On the other hand, if  $\alpha = 0$ , then  $\tilde{W}_\alpha^{(t)} = W^{f(t)}$ , and we assume that people did not reduce  
 696 their mobility levels at all by looping the visit matrix for the first week of March throughout the  
 697 simulation. Any other  $\alpha \in [0, 1]$  interpolates between these two extremes.

698 To simulate changing the timing of mobility reduction, we shift the mobility network by  
 699  $d \in [-7, 7]$  days. Let  $T$  represent the last hour in our simulation (May 2, 2020, 11PM), let  
 700  $f(t) = t \bmod 168$  map  $t$  to its corresponding hour in the first week of simulation as above, and  
 701 similarly let  $g(t)$  map  $t$  to its corresponding hour in the last week of simulation (April 27–May 2,  
 702 2020). We construct the time-shifted visit matrix  $\tilde{W}_d^{(t)}$

$$\tilde{W}_d^{(t)} := \begin{cases} W^{(t-24d)} & \text{if } 0 \leq t - 24d \leq T, \\ W^{f(t-24d)} & \text{if } t - 24d < 0, \\ W^{g(t-24d)} & \text{otherwise.} \end{cases} \quad (29)$$

703 If  $d$  is positive, this corresponds to starting mobility reduction  $d$  days later; if we imagine time on  
 704 a horizontal line, this shifts the time series to the right by  $24d$  hours. However, doing so leaves  
 705 the first  $24d$  hours without visit data, so we fill it in by reusing visit data from the first week of  
 706 simulation. Likewise, if  $d$  is negative, this corresponds to starting mobility reduction  $d$  days earlier,  
 707 and we fill in the last  $24d$  hours with visit data from the last week of simulation.

708 **A minority of POIs account for a majority of infections (Figure 2b and Extended Data Fig-**  
 709 **ure 3).** To evaluate the distribution of infections over POIs, we run our models on the observed

710 mobility data from March 1–May 2, 2020 and record the number of infections that occur at each  
711 POI. Specifically, for each hour  $t$ , we compute the number of expected infections that occur at each  
712 POI  $p_j$  by taking the number of susceptible people who visit  $p_j$  in that hour multiplied by the POI  
713 infection rate  $\lambda_{p_j}^{(t)}$  (Equation (9)). Then, we count the total expected number of infections per POI  
714 by summing over hours. In Figure 2b, we sort the POIs by their expected number of infections and  
715 report the proportion of all infections caused by the top  $x\%$  of POIs.

716 **Reducing mobility by clipping maximum occupancy (Figure 2c, Extended Data Figure 4).**

717 We implemented two partial reopening strategies: one that uniformly reduced visits at POIs to a  
718 fraction of full activity, and the other that “clipped” each POI’s hourly visits to a fraction of the  
719 POI’s maximum occupancy. For each reopening strategy, we started the simulation at March 1,  
720 2020 and ran it until May 31, 2020, using the observed mobility network from March 1–April  
721 30, 2020, and then using a hypothetical post-reopening mobility network from May 1–31, 2020,  
722 corresponding to the projected impact of that reopening strategy. Because we only have observed  
723 mobility data from March 1–May 2, 2020, we impute the missing mobility data up to May 31,  
724 2020 by looping mobility data from the first week of March, as in the above analysis on the effect  
725 of past reductions in mobility. Let  $T$  represent the last hour for which we have observed mobility  
726 data (May 2, 2020, 11PM). To simplify notation, we define

$$h(t) := \begin{cases} t & \text{if } t < T, \\ f(t) & \text{otherwise,} \end{cases} \quad (30)$$

727 where, as above,  $f(t) = t \bmod 168$ . This function leaves  $t$  unchanged if there is observed mo-  
728 bility data at time  $t$ , and otherwise maps  $t$  to the corresponding hour in the first week of our  
729 simulation.

730 To simulate a reopening strategy that uniformly reduced visits to an  $\gamma$ -fraction of their origi-  
731 nal level, where  $\gamma \in [0, 1]$ , we constructed the visit matrix

$$\tilde{W}_\gamma^{(t)} := \begin{cases} W^{h(t)} & \text{if } t < \tau, \\ \alpha W^{h(t)} & \text{otherwise,} \end{cases} \quad (31)$$

732 where  $\tau$  represents the first hour of reopening (May 1, 2020, 12AM). In other words, we use the

733 actual observed mobility network up until hour  $\tau$ , and then subsequently simulate an  $\gamma$ -fraction of  
 734 full mobility levels.

735 To simulate the clipping strategy, we first estimated the maximum occupancy  $M_{p_j}$  of each  
 736 POI  $p_j$  as the maximum number of visits that it ever had in one hour, across all of March 1 to May  
 737 2, 2020. As in previous sections, let  $w_{ij}^{(t)}$  represent the  $i, j$ -th entry in the observed visit matrix  
 738  $W^{(t)}$ , i.e., the number of people from CBG  $c_i$  who visited  $p_j$  in hour  $t$ , and let  $V_{p_j}^{(t)}$  represent the  
 739 total number of visitors to  $p_j$  in that hour, i.e.,  $\sum_i w_{ij}^{(t)}$ . We simulated clipping at a  $\beta$ -fraction of  
 740 maximum occupancy, where  $\beta \in [0, 1]$ , by constructing the visit matrix  $\tilde{W}_{\beta}^{(t)}$  whose  $i, j$ -th entry is

$$\tilde{w}_{ij\beta}^{(t)} := \begin{cases} w_{ij}^{h(t)} & \text{if } t < \tau \text{ or } V_{p_j}^{(t)} \leq \beta M_{p_j}, \\ \frac{\beta M_{p_j}}{V_{p_j}^{(t)}} w_{ij}^{h(t)} & \text{otherwise.} \end{cases} \quad (32)$$

741 This corresponds to the following procedure: for each POI  $p_j$  and time  $t$ , we first check if  $t < \tau$   
 742 (reopening has not started) or if  $V_{p_j}^{(t)} \leq \beta M_{p_j}$  (the total number of visits to  $p_j$  at time  $t$  is below the  
 743 allowed maximum  $\beta M_{p_j}$ ). If so, we leave  $w_{ij}^{h(t)}$  unchanged. Otherwise, we compute the scaling  
 744 factor  $\frac{\beta M_{p_j}}{V_{p_j}^{(t)}}$  that would reduce the total visits to  $p_j$  at time  $t$  down to the allowed maximum  $\beta M_{p_j}$ ,  
 745 and then scale down all visits from each CBG  $c_i$  to  $p_j$  proportionately.

746 For both reopening strategies, we calculate the increase in cumulative incidence at the end of  
 747 the reopening period (May 31, 2020), compared to the start of the reopening period (May 1, 2020).

748 **Relative risk of reopening different categories of POIs (Figure 2d, Extended Data Figures 5**  
 749 **and 8, Figures S10-S19).** We study separately reopening the 20 POI categories with the most  
 750 visits in SafeGraph data. In this analysis, we exclude four categories, following prior work<sup>30</sup>:  
 751 “Child Day Care Services” and “Elementary and Secondary Schools” (because children under 13  
 752 are not well-tracked by SafeGraph); “Drinking Places (Alcoholic Beverages)” (because SafeGraph  
 753 seems to undercount these locations) and “Nature Parks and Other Similar Institutions” (because  
 754 boundaries and therefore areas are not well-defined by SafeGraph). We also exclude “General  
 755 Medical and Surgical Hospitals” and “Other Airport Operations” (because hospitals and air travel  
 756 both involve many additional risk factors our model is not designed to capture). We do not filter  
 757 out these POIs during model fitting, because including them still increases the proportion of overall  
 758 mobility our dataset captures; we simply do not analyze these categories specifically, because we  
 759 wish to be conservative and only focus on categories where we are most confident we are fully

760 capturing transmission at the category. For the Drinking Places (Alcoholic Beverages) category,  
 761 prior work reports that “SafeGraph staff suggest that part of the low count [of drinking places] is  
 762 due to ambiguity in the division between restaurants and bars and pubs that serve food”,<sup>30</sup> and some  
 763 restaurants in the data are indeed described as establishments like bars, beer gardens, breweries,  
 764 cocktail lounges, or Irish pubs. This suggests that some drinking places that also serve food are  
 765 already accounted for in our model under restaurants.

766 This reopening analysis is similar to the above analysis on clipping vs. uniform reopening.  
 767 As above, we set the reopening time  $\tau$  to May 1, 2020, 12AM. To simulate reopening a POI  
 768 category, we take the set of POIs in that category,  $\mathcal{V}$ , and set their activity levels after reopening to  
 769 that of the first week of March. For POIs not in the category  $\mathcal{V}$ , we keep their activity levels after  
 770 reopening the same, i.e., we simply repeat the activity levels of the last week of our data (April  
 771 27–May 2, 2020): This gives us the visit matrix  $\tilde{W}^{(t)}$  with entries

$$\tilde{w}_{ij}^{(t)} := \begin{cases} w_{ij}^{(t)} & \text{if } t < \tau, \\ w_{ij}^{f(t)} & \text{if } t \geq \tau, p_j \in \mathcal{V} \\ w_{ij}^{g(t)} & \text{if } t \geq \tau, p_j \notin \mathcal{V}. \end{cases} \quad (33)$$

772 As in the above reopening analysis,  $f(t)$  maps  $t$  to the corresponding hour in the first week of  
 773 March, and  $g(t)$  maps  $t$  to the corresponding hour in the last week of our data. For each category,  
 774 we calculate the difference between (1) the cumulative fraction of people who have been infected  
 775 by the end of the reopening period (May 31, 2020) and (2) the cumulative fraction of people  
 776 infected by May 31 had we not reopened the POI category (i.e., if we simply repeated the activity  
 777 levels of the last week of our data). This seeks to model the increase in cumulative incidence by  
 778 end of May from reopening the POI category. In Extended Data Figure 5 and Figures S10-S19, the  
 779 bottom right panel shows the increase for the category as a whole, and the bottom left panel shows  
 780 the increase *per POI* (i.e., the total increase divided by the number of POIs in the category).

781 **Per-capita mobility (Figure 3d, Extended Data Figures 6 and 7).** Each group of CBGs (e.g.,  
 782 the bottom income decile) comprises a set  $\mathcal{U}$  of CBGs that fit the corresponding criteria. In Ex-  
 783 tended Data 6, we show the daily per-capita mobilities of different pairs of groups (broken down  
 784 by income and by race). To measure the per-capita mobility of a group on day  $d$ , we take the total  
 785 number of visits made from those CBGs to any POI,  $\sum_{c_i \in \mathcal{U}} \sum_{p_j \in \mathcal{P}} \sum_{t=24d}^{24d+23} w_{ij}^{(t)}$ , and divide it by

786 the total population of the CBGs in the group,  $\sum_{c_i \in \mathcal{U}} N_{c_i}$ . In Extended Data Figure 7, we show the  
 787 total number of visits made by each group to each POI category, accumulated over the entire data  
 788 period (March 1–May 2, 2020) and then divided by the total population of the group.

789 **Average transmission rate of a POI category (Figure 3e).** We compute the average hourly  
 790 transmission rate experienced by a group of CBGs  $\mathcal{U}$  at a POI category  $\mathcal{V}$  as

$$\bar{\beta}_{\mathcal{U}\mathcal{V}} := \frac{\sum_{c_i \in \mathcal{U}} \sum_{p_j \in \mathcal{V}} \sum_{t=1}^T w_{ij}^{(t)} \beta_{p_j}^{(t)}}{\sum_{c_i \in \mathcal{U}} \sum_{p_j \in \mathcal{V}} \sum_{t=1}^T w_{ij}^{(t)}}, \quad (34)$$

791 where, as above,  $\beta_{p_j}^{(t)}$  is the transmission rate at POI  $p_j$  in hour  $t$  (Equation (8)),  $w_{ij}^{(t)}$  is the number  
 792 of visitors from CBG  $c_i$  at POI  $p_j$  in hour  $t$ , and  $T$  is the last hour in our simulation. This represents  
 793 the expected transmission rate encountered during a visit by someone from a CBG in group  $\mathcal{U}$  to a  
 794 POI in category  $\mathcal{V}$ .

## 795 **M7 Estimating the mobility network from SafeGraph data**

796 Finally, we describe how we estimate the dwell time  $d_{p_j}$  (Methods M7.1) and visit matrix  $W^{(t)}$   
 797 (Methods M7.2) from SafeGraph data.

798 **Quantities from SafeGraph data.** We use the following quantities from SafeGraph data:

- 799 • The estimated visit matrix  $\hat{W}^{(r)}$  aggregated for the month  $r$ , where we use  $r$  instead of  $t$  to  
 800 denote time periods longer than an hour. This is taken from the Patterns dataset, and is ag-  
 801 gregated at a monthly level. To account for non-uniform sampling from different CBGs, we  
 802 weight the number of SafeGraph visitors from each CBG by the ratio of the CBG population  
 803 and the number of SafeGraph devices with homes in that CBG.<sup>67</sup>
- 804 •  $\hat{V}_{p_j}^{(t)}$ : The number of visitors recorded in POI  $p_j$  at hour  $t$ . This is taken from the Weekly  
 805 Patterns v1 dataset.
- 806 •  $\hat{h}_{c_i}^{(t)}$ : The estimated fraction of people in CBG  $c_i$  who left their home in day  $\lfloor t/24 \rfloor$ . This is  
 807 derived by taking  $1 - (\text{completely\_home\_device\_count}/\text{device\_count})$ . These  
 808 are daily (instead of hourly) metrics in the Social Distancing Metrics dataset.
- 809 •  $\hat{\delta}_{p_j}$ : The median length of a visit to a POI  $p_j$ . We estimate this by averaging over the weekly

810 values in the `median_dwell` field in the Patterns datasets in March and April 2020.  $\hat{\delta}_{p_j}$  is  
811 measured to minute-level resolution and expressed in units of hours, e.g.,  $\hat{\delta}_{p_j} = 1.5$  means a  
812 median visit time of 1.5 hours = 90 minutes.

## 813 **M7.1 Data preprocessing and dwell time computation**

814 **Hourly visits.** The raw SafeGraph data records the number of visitors that *newly arrive* at each  
815 POI  $p_j$  at each hour. However,  $\hat{V}_{p_j}^{(t)}$  above represents the number of visitors that *are present* at a  
816 POI in an hour  $t$ ; these visitors may have arrived prior to  $t$ . The aggregate visit matrix  $\hat{W}^{(r)}$ , as  
817 well as the visit matrix  $W^{(t)}$  used in our model, are defined similarly. To compute these quantities  
818 from the raw data, we make two assumptions: first, that every visitor to  $p_j$  stays for exactly  $\hat{\delta}_{p_j}$   
819 hours, where  $\hat{\delta}_{p_j}$  is the median length of a visit to  $p_j$ , and second, that a visitor who newly arrives  
820 in an hour  $t$  is equally likely to arrive at any time from  $[t, t + 1)$ . With these assumptions, we can  
821 convert the number of visitor arrivals in each hour into the expected number of visitors present at  
822 each hour: for example, if  $\hat{\delta}_{p_j} = 1.5$  hours, then we assume that a visitor who arrives sometime  
823 during an hour  $t$  will also be present in hour  $t + 1$  and be present half the time, on expectation, in  
824 hour  $t + 2$ . Note that under our definition, visits are still counted even if a visitor does not stay for  
825 the entire hour. For example, a visitor that arrives at 9:30am and leaves at 10:10am will be counted  
826 as two visits: one during the 9-10am hour and one during the 10-11am hour.

827 **The dwell time correction factor  $d_{p_j}$ .** To estimate the mean occupancy at each POI  $p_j$  in an hour  
828  $t$ , we multiply the expected number of visitors present at  $p_j$  in hour  $t$  by the dwell time correction  
829 factor  $d_{p_j}$ , which measures the expected fraction of an hour that a visitor present at  $p_j$  at any hour  
830 will spend there. In other words, conditioned on a visitor being at  $p_j$  at some time within an hour  
831  $t$ ,  $d_{p_j}$  is the expected fraction of the hour  $t$  that the visitor physically spends at  $p_j$ . The same  
832 two assumptions above allow us to calculate  $d_{p_j}$ : since each visitor stays for exactly  $\hat{\delta}_{p_j}$  hours,  
833 and on average is counted as being present in  $\int_0^1 [\hat{\delta}_{p_j} + \tau] d\tau = \hat{\delta}_{p_j} + 1$  different hours, we have  
834  $d_{p_j} = \hat{\delta}_{p_j} / (\hat{\delta}_{p_j} + 1)$ .

835 **Truncating outliers.** As described in Methods [M3.1](#), our model necessarily makes parametric  
836 assumptions about the relationship between POI characteristics (area, hourly visitors, and dwell  
837 time) and transmission rate at the POI; these assumptions may fail to hold for POIs which are out-  
838 liers, particularly if SafeGraph data has errors. We mitigate this concern by truncating extreme

839 values for POI characteristics to prevent data errors from unduly influencing our conclusions.  
840 Specifically, we truncate each POI’s area (i.e., square footage) to the 5th and 95th percentile of  
841 areas in the POI’s category; for every hour, we truncate the number of visitor arrivals for each POI  
842 to its category’s 95th percentile of visitor arrivals in that hour; and we truncate each POI’s median  
843 dwell time to its category’s 90th percentile of median dwell times in that period.

## 844 **M7.2 Estimating the visit matrix $W^{(t)}$**

845 **Overview.** We estimate the visit matrix  $W^{(t)} = \{w_{ij}^{(t)}\}$ , which captures the number of visitors  
846 from CBG  $c_i$  to POI  $p_j$  at each hour  $t$  from March 1, 2020 to May 2, 2020, through the iterative  
847 proportional fitting procedure (IPFP).<sup>34</sup> The idea is as follows:

- 848 1. From SafeGraph data, we can derive a time-independent estimate  $\bar{W}$  of the visit matrix  
849 that captures the aggregate distribution of visits from CBGs to POIs from January 2019 to  
850 February 2020.
- 851 2. However, visit patterns differ substantially from hour to hour (e.g., day versus night) and  
852 day to day (e.g., pre- versus post-lockdown). To capture these variations, we use current  
853 SafeGraph data to estimate the CBG marginals  $U^{(t)}$ , i.e., the total number of visitors leaving  
854 each CBG at each time  $t$ , as well as the POI marginals  $V^{(t)}$ , i.e., the total number of visitors  
855 present at each POI  $p_j$  at time  $t$ .
- 856 3. We then use IPFP to estimate an hourly visit matrix  $W^{(t)}$  that is consistent with the hourly  
857 marginals  $U^{(t)}$  and  $V^{(t)}$  but otherwise “as similar as possible” to the distribution of visits  
858 in the aggregate visit matrix  $\bar{W}$ . Here, similarity is defined in terms of Kullback-Leibler  
859 divergence; we provide a precise definition below.

860 **Estimating the aggregate visit matrix  $\bar{W}$ .** The estimated monthly visit matrices  $\hat{W}^{(r)}$  are typi-  
861 cally noisy and sparse: SafeGraph only matches a subset of visitors to POIs to their home CBGs,  
862 either for privacy reasons (if there are too few visitors from the given CBG) or because they are un-  
863 able to link the visitor to a home CBG.<sup>68</sup> To mitigate this issue, we aggregate these visit matrices,  
864 which are available at the monthly level, over the  $R = 14$  months from January 2019 to February

865 2020:

$$\bar{W} := \frac{1}{R} \sum_r \hat{W}^{(r)}. \quad (35)$$

866 Each entry  $\bar{w}_{ij}$  of  $\bar{W}$  represents the estimated number of visitors from CBG  $c_i$  that are present at  
 867 POI  $p_j$  in an hour, averaged over each hour. After March 2020, SafeGraph reports the visit matrices  
 868  $\hat{W}^{(r)}$  on a weekly level in the Weekly Patterns v1 dataset. However, due to inconsistencies in the  
 869 way SafeGraph processes the weekly vs. monthly matrices, we only use the monthly matrices up  
 870 until February 2020.

871 **Estimating the POI marginals  $V^{(t)}$ .** We estimate the POI marginals  $V^{(t)} \in \mathbb{R}^n$ , whose  $j$ -th  
 872 element  $V_{p_j}^{(t)}$  represents our estimate of the number of visitors at POI  $p_j$  (from any CBG) at time  $t$ .  
 873 The number of visitors recorded at POI  $p_j$  at hour  $t$  in the SafeGraph data,  $\hat{V}_{p_j}^{(t)}$ , is an underestimate  
 874 because the SafeGraph data only covers on a fraction of the overall population. To correct for this,  
 875 we follow Benzell et al.<sup>30</sup> and compute our final estimate of the visitors at POI  $p_j$  in time  $t$  as

$$V_{p_j}^{(t)} = \frac{\text{US population}}{\text{total number of SafeGraph devices}} \cdot \hat{V}_{p_j}^{(t)}. \quad (36)$$

876 This correction factor is approximately 7, using population data from the most recent 1-year ACS  
 877 (2018).

878 **Estimating the CBG marginals  $U^{(t)}$ .** Next, we estimate the CBG marginals  $U^{(t)} \in \mathbb{R}^m$ . Here,  
 879 the  $i$ -th element  $U_{c_i}^{(t)}$  represents our estimate of the number of visitors leaving CBG  $c_i$  (to visit  
 880 any POI) at time  $t$ . We will also use  $N_{c_i}$ ; recall that  $N_{c_i}$  is the total population of  $c_i$ , which is  
 881 independent of  $t$ .

882 We first use the POI marginals  $V^{(t)}$  to calculate the total number of people who are out  
 883 visiting any POI from any CBG at time  $t$ ,

$$N_{\text{POIs}}^{(t)} := \sum_{j=1}^n V_{p_j}^{(t)}, \quad (37)$$

884 where  $n$  is the total number of POIs. Since the total number of people leaving any CBG to visit a  
 885 POI must equal the total number of people at all the POIs, we have that  $N_{\text{POIs}}^{(t)} = \sum_{i=1}^m U_{c_i}^{(t)}$ , where



886  $m$  is the total number of CBGs.

887 Next, we estimate the number of people from each CBG  $c_i$  who are not at home at time  $t$  as  
 888  $\hat{h}_{c_i}^{(t)} N_{c_i}$ . In general, the total number of people who are not at home in their CBGs,  $\sum_{i=1}^m \hat{h}_{c_i}^{(t)} N_{c_i}$ ,  
 889 will not be equal to  $N_{\text{POIs}}^{(t)}$ , the number of people who are out visiting any POI. This discrepancy  
 890 occurs for several reasons: for example, some people might have left their homes to travel to places  
 891 that SafeGraph does not track, SafeGraph might not have been able to determine the home CBG  
 892 of a POI visitor, etc.

893 To correct for this discrepancy, we assume that the relative proportions of POI visitors com-  
 894 ing from each CBG follows the relative proportions of people who are not at home in each CBG.  
 895 We thus estimate  $U_{c_i}^{(t)}$  by apportioning the  $N_{\text{POIs}}^{(t)}$  total POI visitors at time  $t$  according to the pro-  
 896 portion of people who are not at home in each CBG  $c_i$  at time  $t$ :

$$U_{c_i}^{(t)} := N_{\text{POIs}}^{(t)} \cdot \frac{\hat{h}_{c_i}^{(t)} N_{c_i}}{\sum_{k=1}^m \hat{h}_{c_k}^{(t)} N_{c_k}}, \quad (38)$$

897 where  $N_{c_i}$  is the total population of CBG  $i$ , as derived from US Census data. This construction  
 898 ensures that the POI and CBG marginals match, i.e.,  $N_{\text{POIs}}^{(t)} = \sum_{j=1}^n V_{p_j}^{(t)} = \sum_{i=1}^m U_{c_i}^{(t)}$ .

899 **Iterative proportional fitting procedure (IPFP).** IPFP is a classic statistical method<sup>34</sup> for ad-  
 900 justing joint distributions to match pre-specified marginal distributions, and it is also known in the  
 901 literature as biproportional fitting, the RAS algorithm, or raking.<sup>69</sup> In the social sciences, it has  
 902 been widely used to infer the characteristics of local subpopulations (e.g., within each CBG) from  
 903 aggregate data.<sup>70–72</sup>

904 We estimate the visit matrix  $W^{(t)}$  by running IPFP on the aggregate visit matrix  $\bar{W}$ , the  
 905 CBG marginals  $U^{(t)}$ , and the POI marginals  $V^{(t)}$  constructed above. Our goal is to construct a  
 906 non-negative matrix  $W^{(t)} \in \mathbb{R}^{m \times n}$  whose rows sum up to the CBG marginals  $U^{(t)}$ ,

$$U_{c_i}^{(t)} = \sum_{j=1}^n w_{ij}^{(t)}, \quad (39)$$

907 and whose columns sum up to the POI marginals  $V_{p_j}^{(t)}$ ,

$$V_{p_j}^{(t)} = \sum_{i=1}^m w_{ij}^{(t)}, \quad (40)$$

908 but whose distribution is otherwise “as similar as possible”, in the sense of Kullback-Leibler di-  
 909 vergence, to the distribution over visits induced by the aggregate visit matrix  $\bar{W}$ .

---

**Algorithm 1:** Iterative proportional fitting procedure to estimate visit matrix  $W^{(t)}$

---

```

Input: Aggregate visits  $\bar{W} \in \mathbb{R}^{m \times n}$ 
          CBG marginals  $U^{(t)} \in \mathbb{R}^m$ ; POI marginals  $V^{(t)} \in \mathbb{R}^n$ 
          Number of iterations  $\tau_{\max}$ 
Initialize  $W^{(t,0)} = \bar{W}$ 
for  $\tau = 1, \dots, \tau_{\max}$  do
    if  $\tau$  is odd then
        for  $i = 1, \dots, m$  do
             $\alpha_i \leftarrow U_{c_i}^{(t)} / \sum_{j=1}^n w_{ij}^{(t)}$  // Compute scaling factor for row  $i$ 
             $W_{i,:}^{(t,\tau)} \leftarrow \alpha_i * W_{i,:}^{(t,\tau-1)}$  // Rescale row  $i$ 
        end
    else if  $\tau$  is even then
        for  $j = 1, \dots, n$  do
             $\beta_j \leftarrow V_{p_j}^{(t)} / \sum_{i=1}^m w_{ij}^{(t)}$  // Compute scaling factor for col  $j$ 
             $W_{:,j}^{(t,\tau)} \leftarrow \beta_j * W_{:,j}^{(t,\tau-1)}$  // Rescale col  $j$ 
        end
    end
end
 $W^{(t)} \leftarrow W^{(t,\tau_{\max})}$ 
    
```

---

910 IPFP is an iterative algorithm that alternates between scaling each row to match the row  
 911 (CBG) marginals  $U^{(t)}$  and scaling each column to match the column (POI) marginals  $V^{(t)}$ . We  
 912 provide pseudocode in Algorithm 1. For each value of  $t$  used in our simulation, we run IPFP  
 913 separately for  $\tau_{\max} = 100$  iterations. Note that IPFP is invariant to scaling the absolute magnitude  
 914 of the entries in  $\bar{W}$ , since the total number of visits it returns is fixed by the sum of the marginals;  
 915 instead, its output depends only on the distribution over visits in  $\bar{W}$ .

916 The notion of similarity invoked above has a maximum likelihood interpretation: if IPFP  
 917 converges, then it returns a visit matrix  $W^{(t)}$  whose induced distribution minimizes the Kullback-  
 918 Leibler divergence to the distribution induced by  $\bar{W}$ .<sup>73</sup> We further discuss the convergence of IPFP  
 919 in our setting in SI Section S3.

## Methods references

44. SafeGraph. Places Schema (2020). Available at <https://docs.safegraph.com/docs/places-schema>.
45. SafeGraph. Weekly Patterns (2020). Available at <https://docs.safegraph.com/docs/weekly-patterns>.
46. SafeGraph. Using SafeGraph Polygons to Estimate Point-Of-Interest Square Footage (2019). Available at <https://www.safegraph.com/blog/using-safegraph-polygons-to-estimate-point-of-interest-square-footage>.
47. SafeGraph. Guide to Points-of-Interest Data: POI Data FAQ (2020). Available at <https://www.safegraph.com/points-of-interest-poi-data-guide>.
48. SafeGraph. Social Distancing Metrics (2020). Available at <https://docs.safegraph.com/docs/social-distancing-metrics>.
49. Athey, S., Blei, D., Donnelly, R., Ruiz, F. & Schmidt, T. Estimating heterogeneous consumer preferences for restaurants and travel time using mobile location data. In *AEA Papers and Proceedings*, vol. 108, 64–67 (2018).
50. Chen, M. K. & Rohla, R. The effect of partisanship and political advertising on close family ties. *Science* **360**, 1020–1024 (2018).
51. Farboodi, M., Jarosch, G. & Shimer, R. Internal and external effects of social distancing in a pandemic (2020). Available at <https://nber.org/papers/w27059>.
52. Killeen, B. D. *et al.* A County-level Dataset for Informing the United States' Response to COVID-19 (2020). Available at <https://arxiv.org/abs/2004.00756>.
53. Allcott, H. *et al.* Polarization and public health: Partisan differences in social distancing during the Coronavirus pandemic (2020). Available at [nber.org/papers/w26946](https://nber.org/papers/w26946).
54. Google. COVID-19 community mobility reports (2020). Available at <https://google.com/covid19/mobility/>.
55. Athey, S., Ferguson, B., Gentzkow, M. & Schmidt, T. Experienced Segregation (2019). Available at <https://gsb.stanford.edu/faculty-research/working-papers/experienced-segregation>.
56. Squire, R. F. What about bias in the SafeGraph dataset? (2019). Available at <https://safegraph.com/blog/what-about-bias-in-the-safegraph-dataset>.
57. US Census. American Community Survey. Available at <https://census.gov/programs-surveys/acs>.
58. Park, M., Cook, A. R., Lim, J. T., Sun, Y. & Dickens, B. L. A systematic review of COVID-19 epidemiology based on current evidence. *Journal of Clinical Medicine* **9**, 967 (2020).
59. Curmei, M., Ilyas, A., Evans, O. & Steinhardt, J. Estimating household transmission of sars-cov-2. *medRxiv* (2020). Available at <https://doi.org/10.1101/2020.05.23.20111559>.
60. Li, W. *et al.* The characteristics of household transmission of COVID-19. *Clinical Infectious Diseases*.
61. Gudbjartsson, D. F. *et al.* Spread of sars-cov-2 in the icelandic population. *New England Journal of Medicine* (2020).

62. Carey, B. & Glanz, J. Hidden outbreaks spread through u.s. cities far earlier than americans knew, estimates say. *The New York Times* (2020). Available at <https://nytimes.com/2020/04/23/us/coronavirus-early-outbreaks-cities.html>.
63. King, A. A., Domenech de Cellès, M., Magpantay, F. M. & Rohani, P. Avoidable errors in the modelling of outbreaks of emerging pathogens, with special reference to ebola. *Proceedings of the Royal Society B: Biological Sciences* **282**, 20150347 (2015).
64. Emanuel, E. J., Phillips, J. P. & Popescu, S. COVID-19 Activity Risk Levels (2020). Available at <http://www.ezekielemanuel.com/writing/all-articles/2020/06/30/covid-19-activity-risk-levels>.
65. DesOrmeau, T. From hair salons to gyms, experts rank 36 activities by coronavirus risk level. *MLive* (2020). Available at <https://www.mlive.com/public-interest/2020/06/from-hair-salons-to-gyms-experts-rank-36-activities-by-coronavirus-risk-level.html>.
66. Verity, R. *et al.* Estimates of the severity of coronavirus disease 2019: a model-based analysis. *The Lancet* **20**, 669–677 (2020).
67. SafeGraph. Measuring and Correcting Sampling Bias in Safegraph Patterns for More Accurate Demographic Analysis (2020). Available at <https://safegraph.com/blog/measuring-and-correcting-sampling-bias-for-accurate-demographic-analysis>.
68. SafeGraph. Places Manual (2020). Available at <https://docs.safegraph.com/docs/places-manual#section-visitor-home-cbgs>.
69. Bishop, Y. M., Fienberg, S. E. & Holland, P. W. Discrete multivariate analysis (1975).
70. Birkin, M. & Clarke, M. Synthesis—a synthetic spatial information system for urban and regional analysis: methods and examples. *Environment and planning A* **20**, 1645–1671 (1988).
71. Wong, D. W. The reliability of using the iterative proportional fitting procedure. *The Professional Geographer* **44**, 340–348 (1992).
72. Simpson, L. & Tranmer, M. Combining sample and census data in small area estimates: Iterative proportional fitting with standard software. *The Professional Geographer* **57**, 222–234 (2005).
73. Csiszár, I. I-divergence geometry of probability distributions and minimization problems. *The Annals of Probability* 146–158 (1975).
74. Perkins, A. *et al.* Estimating unobserved SARS-CoV-2 infections in the United States. *medRxiv* (2020). Available at <https://doi.org/10.1101/2020.03.15.20036582>.
75. Bommer, C. & Vollmer, S. Average detection rate of SARS-CoV-2 infections has improved since our last estimates but is still as low as nine percent on March 30th (2020). Available at <https://www.uni-goettingen.de/en/606540.html>.
76. Javan, E., Fox, S. J. & Meyers, L. A. The unseen and pervasive threat of COVID-19 throughout the US. *medRxiv* (2020). Available at <https://doi.org/10.1101/2020.04.06.20053561>.
77. APM Research Lab. The color of coronavirus: COVID-19 deaths by race and ethnicity in the U.S. (2020). Available at <https://apmresearchlab.org/covid/deaths-by-race>.
78. Pukelsheim, F. Biproportional scaling of matrices and the iterative proportional fitting procedure. *Annals of Operations Research* **215**, 269–283 (2014).

79. Gietl, C. & Reffel, F. P. Accumulation points of the iterative proportional fitting procedure. *Metrika* **76**, 783–798 (2013).

**Data Availability.** Census data, case and death counts from *The New York Times*, and Google mobility data are publicly available. Cell phone mobility data is freely available to researchers, non-profits, and governments through the SafeGraph COVID-19 Data Consortium.

**Code Availability.** Code is in preparation and will be made publicly available at <http://snap.stanford.edu/covid-mobility/>.

**Acknowledgements.** The authors thank Yong-Yeol Ahn, Nic Fishman, Tatsunori Hashimoto, Roni Rosenfeld, Jacob Steinhardt, Ryan Tibshirani, and our anonymous reviewers for helpful comments. We also thank Nick Singh, Ryan Fox Squire, Jessica Williams-Holt, Jonathan Wolf, Ruowei Yang, and others at SafeGraph for cell phone mobility data and helpful feedback. This research was supported by US National Science Foundation under OAC-1835598 (CINES), OAC-1934578 (HDR), CCF-1918940 (Expeditions), Chan Zuckerberg Biohub, Stanford Data Science Initiative, and the Stanford University Dean's Research Fund. S.C. was supported by an NSF Fellowship. E.P. was supported by a Hertz Fellowship. P.W.K. was supported by the Facebook Fellowship Program. J.L. is a Chan Zuckerberg Biohub investigator.

**Author Contributions.** S.C., E.P., and P.W.K. performed computational analysis. All authors jointly analyzed the results and wrote the paper.

**Author Information.** The authors declare no conflict of interest. Correspondence should be addressed to [jure@cs.stanford.edu](mailto:jure@cs.stanford.edu).

## 920 Extended data

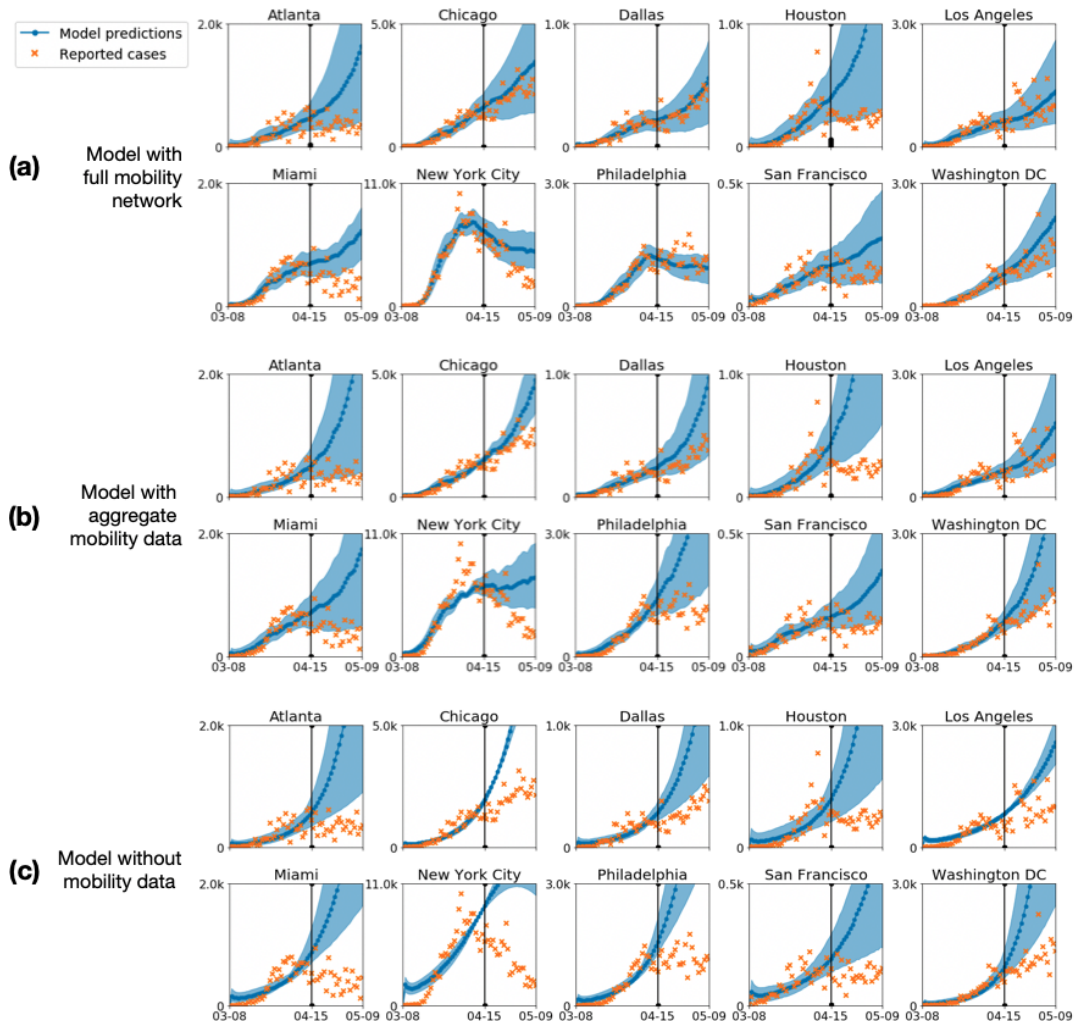

**Extended Data Figure 1:** Predicted (blue) and true (orange) daily case counts for (a) our model, which uses hourly mobility networks, (b) an SEIR model which uses hourly aggregated mobility data, and (c) a baseline SEIR model which does not use mobility data. Incorporating mobility information improves out-of-sample fit and having a network, instead of an aggregate measure, further improves fit. All three models are calibrated on observed case counts before April 15, 2020 (vertical black line). Shaded regions denote 2.5th and 97.5th percentiles across sampled parameters and stochastic realizations. See Methods [M4.4](#) and Methods [M5.1](#) for details.

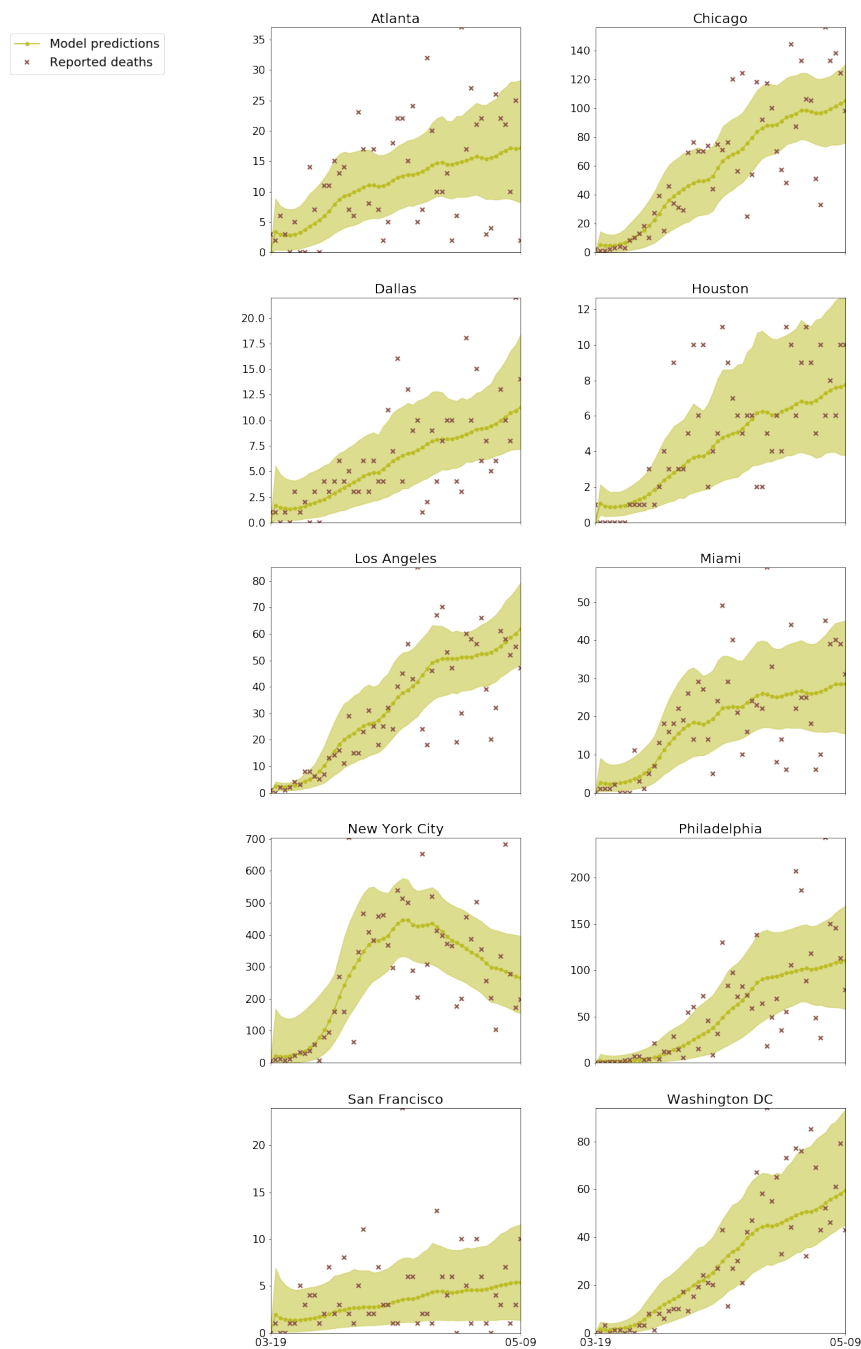

**Extended Data Figure 2:** Predicted (green) and true (brown) daily death counts, when our model is calibrated on observed *death* counts from March 19 to May 9, 2020. Shaded regions denote 2.5th and 97.5th percentiles across sampled parameters and stochastic realizations. See Methods [M5.5](#) for details.



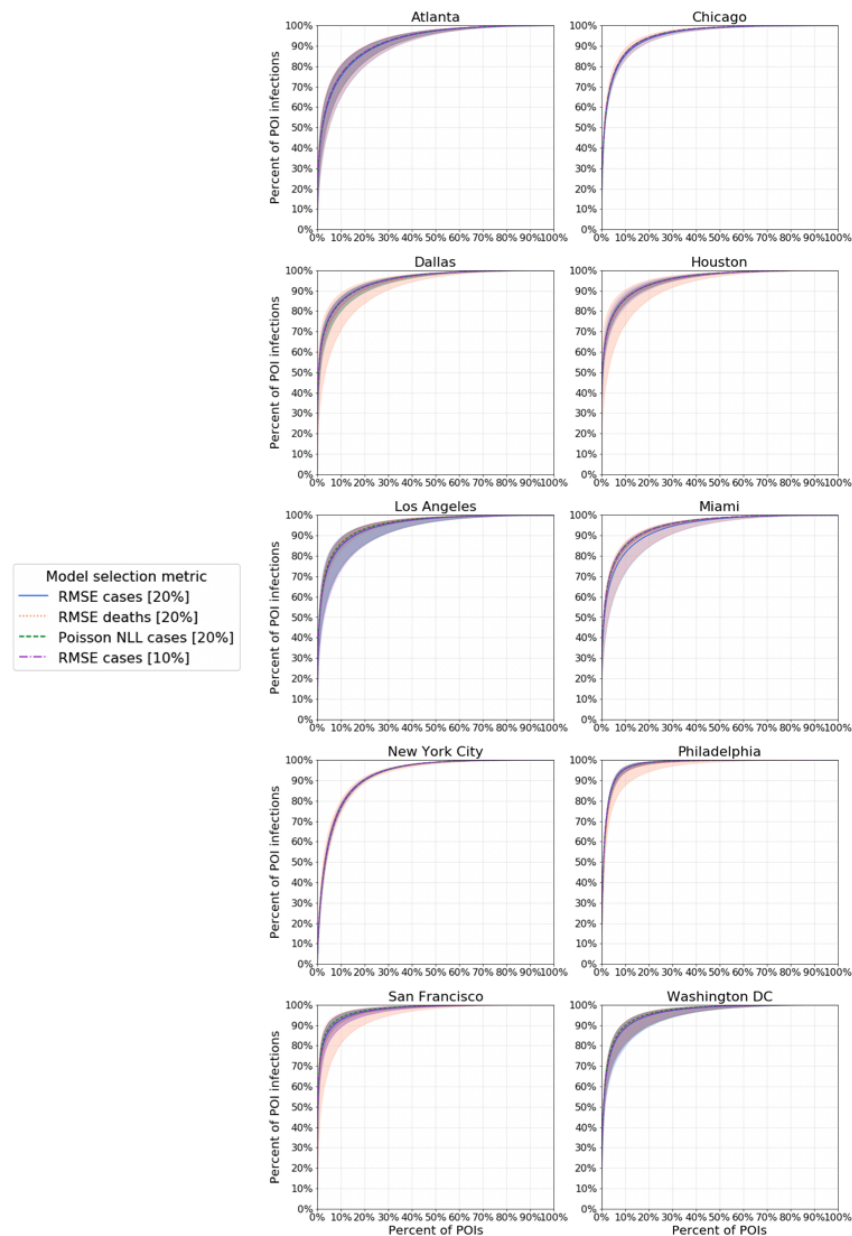

**Extended Data Figure 3:** A small fraction of POIs account for a large fraction of the predicted infections at POIs. We additionally conducted a sensitivity analysis on which metric was used for model calibration and show that this key finding holds across all metrics. For each metric setting, we ran our models on the observed mobility data from March 1–May 2, 2020 and recorded the predicted number of infections that occurred at each POI. Shaded regions denote 2.5th and 97.5th percentiles across sampled parameters and stochastic realizations. See Methods [M5.5](#) for details on model calibration metrics, and Methods [M6](#) for details on this experiment.

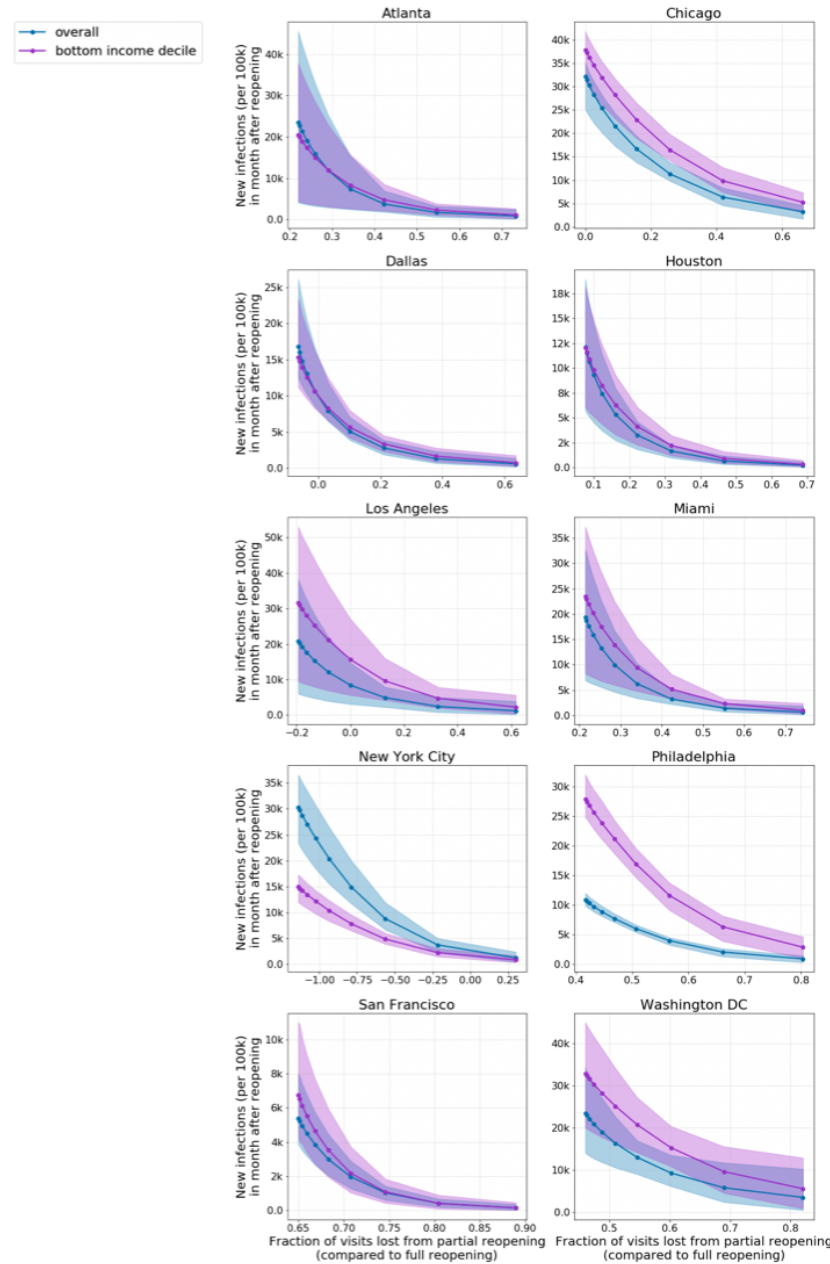

**Extended Data Figure 4:** The predicted increase in infections under the reduced occupancy reopening strategy. We simulate reopening starting on May 1, 2020 and run the simulation until the end of the month. Each dot represents the level of occupancy reduction: e.g., capping visits at 50% of maximum occupancy, at 20% of maximum occupancy, etc. The y-coordinate of each dot represents the predicted number of new infections incurred after reopening (per 100k population) and its x-coordinate represents the fraction of visits lost from partial reopening compared to full reopening. Shaded regions denote 2.5th and 97.5th percentiles across sampled parameters and stochastic realizations. In 4 MSAs, the cost of new infections from reopening is roughly similar for lower-income CBGs and the overall population, but in 5 MSAs, the lower-income CBGs incur more infections from reopening. Notably, New York City (NYC) is the only MSA where this trend is reversed; this is because such a high fraction—65% (95% CI, 62%-68%)—of lower-income CBGs in NYC had been infected before reopening that after reopening, only a minority of the lower-income population is still susceptible (in comparison, the second highest fraction infected before reopening was 31% (95% CI, 28%-35%) for Philadelphia, and the rest ranged from 1%-14%). See Methods M6 for reopening details.

## All MSAs

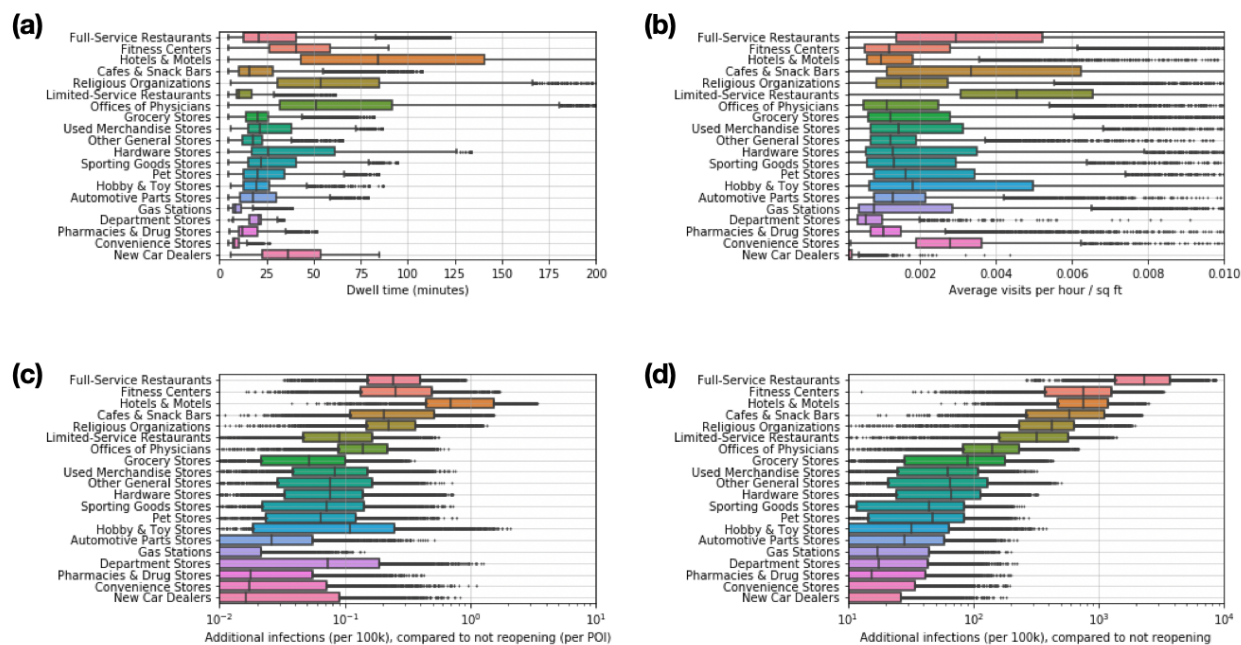

**Extended Data Figure 5:** POI attributes in all 10 MSAs combined. The top two plots pool POIs from all MSAs, showing **(a)** the distribution of dwell time, and **(b)** the average number of hourly visitors divided by the area of the POI in square feet. Each point represents one POI; boxes depict the interquartile range across POIs. The bottom two plots pool across models from all MSAs, and show predictions for the increase in infections (per 100k population) from reopening a POI category: **(c)** per POI, and **(d)** for the category as a whole. Each point represents one model realization; boxes depict the interquartile range across sampled parameters and stochastic realizations. See Methods [M6](#) for reopening details.

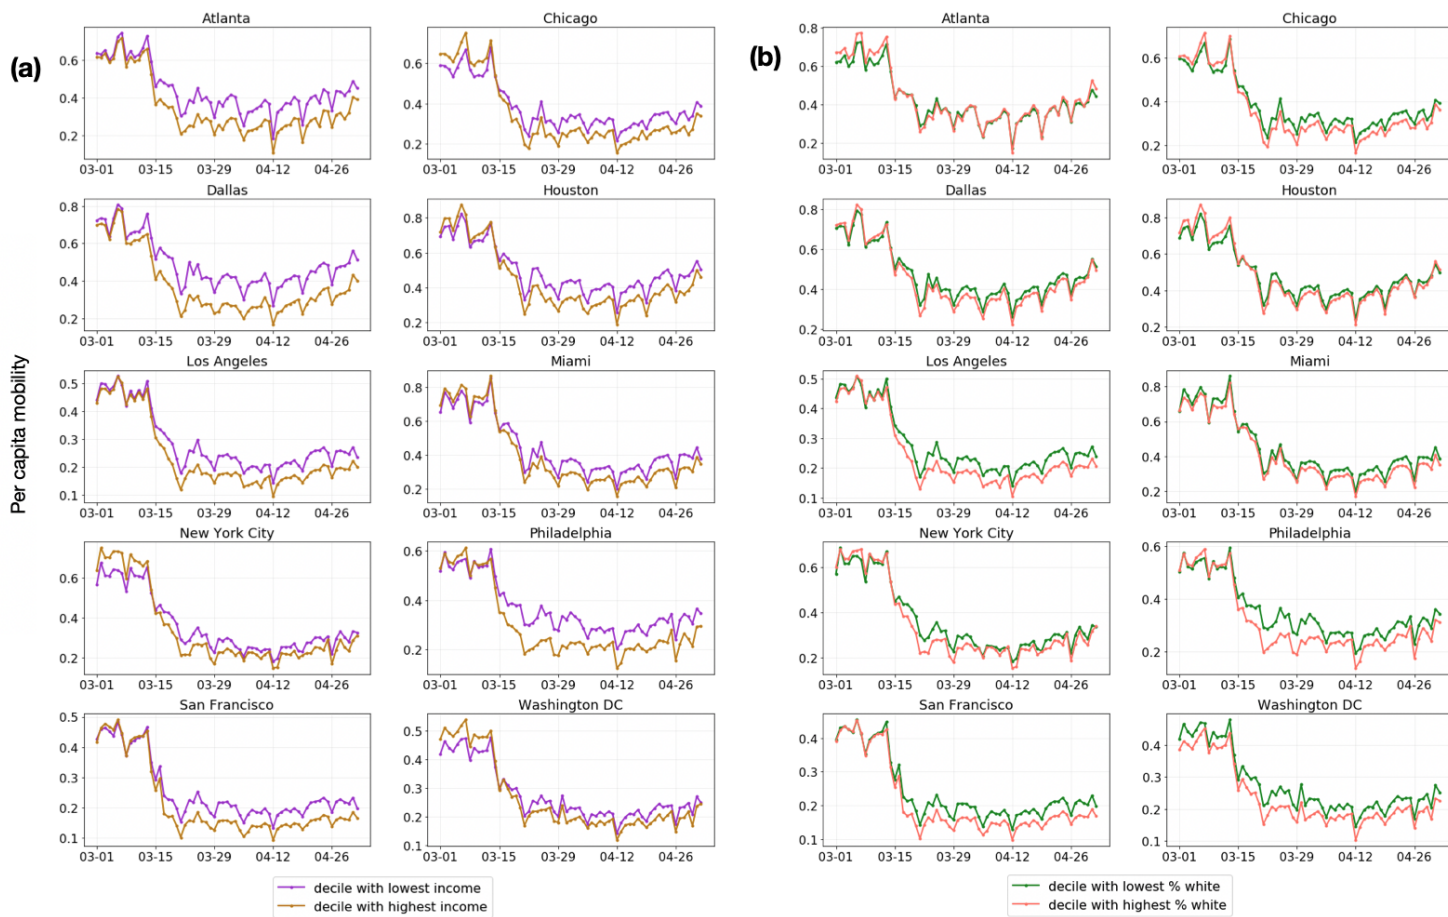

**Extended Data Figure 6:** Daily per-capita mobility over time, (a) comparing lower-income to higher-income CBGs and (b) comparing less white to more white CBGs. See Methods M6 for details.

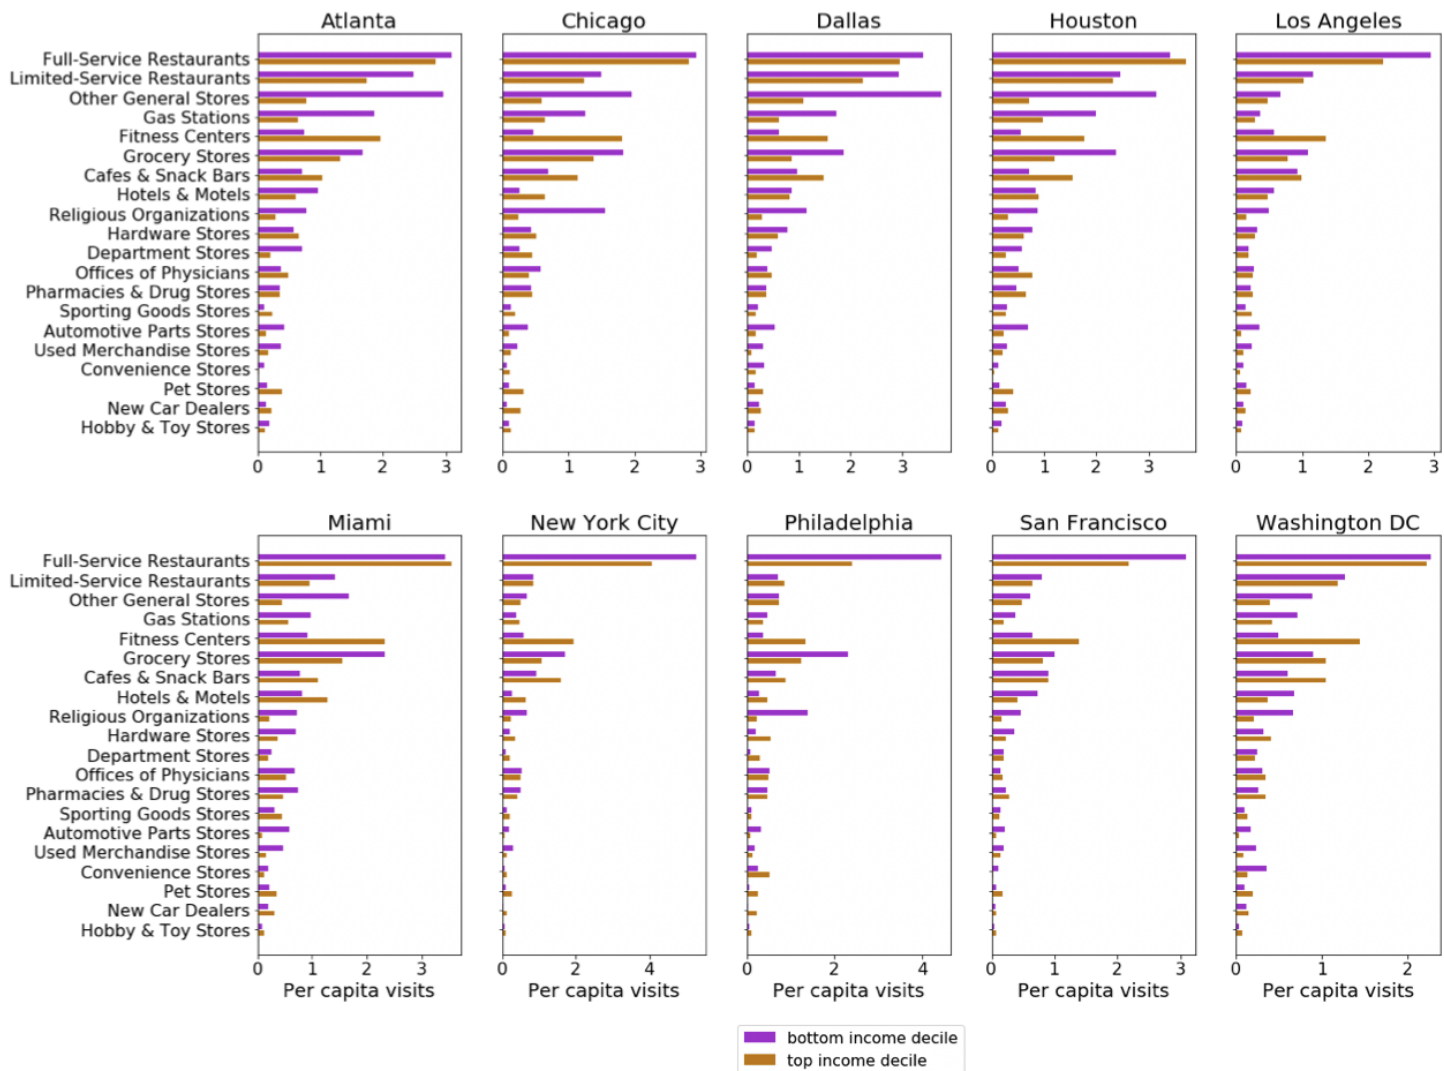

**Extended Data Figure 7:** Visits per capita from CBGs in the bottom- (purple) and top- (gold) income deciles to each POI category, accumulated from March 1–May 2, 2020. See Methods M6 for details.

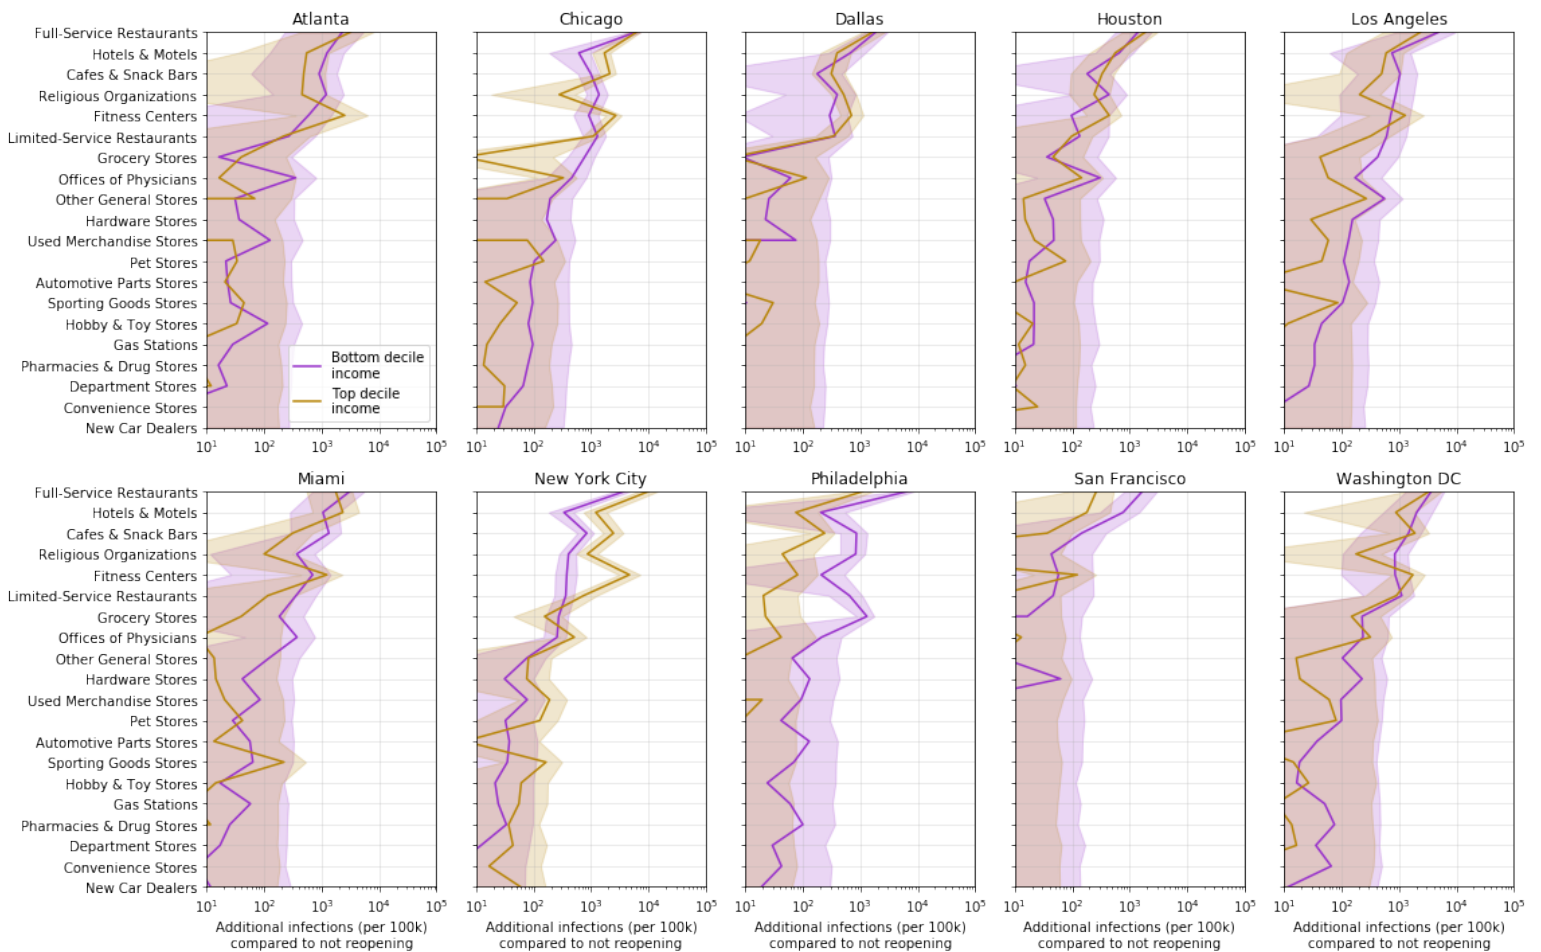

**Extended Data Figure 8:** Predicted additional infections (per 100k population) from reopening each POI category, for CBGs in the top- (gold) and bottom- (purple) income deciles. Reopening impacts are generally worse for lower-income CBGs. See Methods [M6](#) for reopening details.

| <b>MSA</b>               | <b>CBGs</b>   | <b>POIs</b>    | <b>Hourly edges</b>  | <b>Total modeled pop</b> | <b>Total visits</b> |
|--------------------------|---------------|----------------|----------------------|--------------------------|---------------------|
| Atlanta                  | 3,130         | 39,411         | 540,166,727          | 7,455,619                | 27,669,692          |
| Chicago                  | 6,812         | 62,420         | 540,112,026          | 10,169,539               | 33,785,702          |
| Dallas                   | 4,877         | 52,999         | 752,998,455          | 9,353,561                | 37,298,053          |
| Houston                  | 3,345         | 49,622         | 609,766,288          | 7,621,541                | 32,943,613          |
| Los Angeles              | 8,904         | 83,954         | 643,758,979          | 16,101,274               | 38,101,674          |
| Miami                    | 3,555         | 40,964         | 487,544,190          | 6,833,129                | 26,347,947          |
| New York City            | 14,763        | 122,428        | 1,057,789,207        | 20,729,481               | 66,581,080          |
| Philadelphia             | 4,565         | 37,951         | 304,697,220          | 6,759,058                | 19,551,138          |
| San Francisco            | 2,943         | 28,713         | 161,575,167          | 5,137,800                | 10,728,090          |
| Washington DC            | 4,051         | 34,296         | 312,620,619          | 7,740,276                | 17,898,324          |
| <b>All MSAs combined</b> | <b>56,945</b> | <b>552,758</b> | <b>5,411,028,878</b> | <b>97,901,278</b>        | <b>310,905,313</b>  |

**Extended Data Table 1: Dataset summary statistics from March 1–May 2, 2020.**

| Param.                | Description                                        | Value (Source)                           |
|-----------------------|----------------------------------------------------|------------------------------------------|
| $\delta_E$            | mean latency period                                | 96 hours <sup>22,43</sup>                |
| $\delta_I$            | mean infectious period                             | 84 hours <sup>22</sup>                   |
| $\delta_c$            | period from infectious to confirmed                | 7 days <sup>22,74</sup>                  |
| $r_c$                 | percentage of cases which are detected             | 10% <sup>22,43,74-76</sup>               |
| $\delta_d$            | period from infectious to death                    | 18 days <sup>66</sup>                    |
| $r_d$                 | infection fatality rate                            | 0.66% <sup>66</sup>                      |
| $\beta_{\text{base}}$ | base CBG transmission rate                         | Variable (Estimated)                     |
| $N_{c_i}$             | population size of CBG $c_i$                       | Variable (2018 US Census <sup>57</sup> ) |
| $\psi$                | scaling factor for POI transmission                | Variable (Estimated)                     |
| $w_{ij}^{(t)}$        | # visitors from CBG $c_i$ to POI $p_j$ at time $t$ | Variable (SafeGraph)                     |
| $a_{p_j}$             | area of POI $p_j$ in square feet                   | Variable (SafeGraph)                     |
| $p_0$                 | initial proportion of latent population            | Variable (Estimated)                     |
| $S_{c_i}^{(0)}$       | initial susceptible population in CBG $c_i$        | $(1 - p_0)N_{c_i}$                       |
| $E_{c_i}^{(0)}$       | initial latent population in CBG $c_i$             | $p_0N_{c_i}$                             |
| $I_{c_i}^{(0)}$       | initial infected population in CBG $c_i$           | 0                                        |
| $R_{c_i}^{(0)}$       | initial removed population in CBG $c_i$            | 0                                        |

**Extended Data Table 2: Model parameters.** If the parameter has a fixed value, we specify it under **Value**; otherwise, we write “Variable” to indicate that it varies across CBG / POI / MSA.



## 921 **Supplementary methods**

### 922 **S1 Comparison of Google and SafeGraph mobility data**

923 To assess the reliability of the SafeGraph datasets, we measured the correlation between mobility  
924 trends according to SafeGraph versus Google.<sup>54</sup> Google provides a high-level picture of mobility  
925 changes around the world for several categories of places, such as grocery stores or restaurants.  
926 We analyzed three of the categories defined by Google: *Retail & recreation* (e.g., restaurants,  
927 shopping centers, movie theaters), *Grocery & pharmacy* (e.g., grocery stores, farmers markets,  
928 pharmacies), and *Residential* (i.e. places of residence). We omitted *Transit stations* because they  
929 are not well-covered by SafeGraph POIs, *Parks* because SafeGraph informed us that parks are  
930 sometimes inaccurately classified in their data (e.g., other POIs are categorized as parks), and  
931 *Workplaces* because we do not model whether people are at work. To analyze the *Retail & recre-*  
932 *ation* and *Grocery & pharmacy* categories, we used POI visits in the SafeGraph Patterns datasets,  
933 identifying POIs in each category based on their 6-digit North American Industry Classification  
934 System (NAICS) codes (Table S6). For the *Residential* category, we used SafeGraph Social Dis-  
935 tancing Metrics, which provides daily counts of the number of people in each CBG who stayed at  
936 home for the entire day.

937 For each US region and category, Google tracks how the number of visits to the category has  
938 changed over the last few months, compared to baseline levels of activity before SARS-CoV-2.  
939 To set this baseline, they compute the median number of visits to the category for each day of the  
940 week, over a 5-week span from January 3–February 6, 2020. For a given day of interest, they then  
941 compute the relative change in number of visits seen on this day compared to the baseline for the  
942 corresponding day of week. We replicated this procedure on SafeGraph data, and compared the  
943 results to Google’s trends for Washington DC and 14 states that appear in the MSAs that we model.  
944 For each region and category, we measured the Pearson correlation between the relative change in  
945 number of visits according to Google versus Safegraph, from March 1–May 2, 2020. Across the  
946 15 regions, we found that the median Pearson correlation was 0.96 for *Retail & recreation*, 0.79 for  
947 *Grocery & pharmacy*, and 0.88 for *Residential*. As an illustrative example, we visualize the results  
948 for New York state in Figure S3, and provide a full table of results for every state in Table S7.  
949 The high correlations demonstrate that the SafeGraph and Google mobility datasets agree well on  
950 the timing and directional changes of mobility over this time period, providing a validation of the  
951 reliability of SafeGraph data.

## 952 **S2 Plausibility of predicted racial/socioeconomic disparities**

953 To assess the plausibility of the predicted disparities in infection rates in Figure 3, we compared  
954 the model's predicted racial disparities to observed racial disparities in mortality rates. (Data on  
955 socioeconomic disparities in mortality was not systematically available on a national level.) The  
956 racial disparities in Figure 3 are generally of the same magnitude as reported racial disparities  
957 in mortality rates—for example, the overall reported black mortality rate is  $2.4\times$  higher than the  
958 white mortality rate,<sup>77</sup> which is similar to the median racial disparity across MSAs of  $3.0\times$  that our  
959 model predicts (Figure 3b). However, we note that this is an imperfect comparison because many  
960 factors besides mobility contribute to racial disparities in death rates.

961 In addition, we observed that our model predicted unusually large socioeconomic and racial  
962 disparities in infection rates in the Philadelphia MSA. To understand why the model predicted  
963 such large disparities, we inspected the mobility factors discussed in the main text; namely, how  
964 much each group was able to reduce their mobility, and whether disadvantaged groups encountered  
965 higher transmission rates at POIs.

966 First, we find in Philadelphia that higher-income CBGs were able to reduce their mobility  
967 substantially more than lower-income CBGs (Extended Data Figure 6 left). The CBGs with the  
968 greatest percentage of white residents were also able to reduce their mobility more than the CBGs  
969 with the lowest percentage of white residents (Extended Data Figure 6 right). These gaps are  
970 noticeable, but not obviously larger than those in other MSAs. The key to Philadelphia's outlier  
971 status seems to lie in the comparison of transmission rates. Within the same category of POI—  
972 e.g., full-service restaurants—individuals from lower-income CBGs tend to visit POIs with higher  
973 transmission rates than individuals from high-income CBGs (Table S4). This is particularly true  
974 for Philadelphia; in 19 out of 20 categories, individuals from lower-income CBGs in Philadelphia  
975 encounter higher transmission rates than individuals from high-income CBGs, and CBGs with the  
976 lowest percentage of white residents encounter higher transmission rates than the CBGs with the  
977 highest percentage of white residents in all 20 categories (Table S5). The transmission rates en-  
978 countered by individuals from lower-income CBGs in Philadelphia are often dramatically higher  
979 than those encountered by higher-income CBGs; for example, up to  $10.4\times$  higher for grocery  
980 stores. Digging deeper, this is because the average grocery store visited by lower-income CBGs  
981 has  $5.3\times$  the number of hourly visitors per square foot, and visitors tend to stay 86% longer. Fur-  
982 thermore, Philadelphia's large discrepancy in density between lower-income and higher-income  
983 POIs in SafeGraph data is consistent with Census data, which shows that the discrepancy in *popu-*

984 *lation* density between lower- and higher-income CBGs is larger in Philadelphia than in any of the  
 985 other MSAs that we examine. In Philadelphia, CBGs in the bottom income decile have a popula-  
 986 tion density  $8.2\times$  those in the top income decile, a considerably larger disparity than the overall  
 987 median across MSAs ( $3.3\times$ ) or the next-highest CBG ( $4.5\times$ ).

988 Since there are many other factors contributing to disparity that we do not model, we do  
 989 not place too much weight on our model’s prediction that Philadelphia’s disparities will be larger  
 990 than those of other cities. However, we consider this a valuable finding in terms of Philadelphia’s  
 991 mobility patterns, suggesting that mobility may play an especially strong role in driving socioeco-  
 992 nomic and racial infection disparities in this MSA, and we encourage policymakers to be aware of  
 993 how differences in mobility patterns may exacerbate the disproportionate impact of SARS-CoV-2  
 994 on disadvantaged groups.

### 995 **S3 Convergence of iterative proportional fitting**

996 For completeness, we briefly review the convergence properties of the iterative proportional fitting  
 997 procedure (IPFP) used to infer our mobility networks. Consider the  $L_1$ -error function

$$E^{(t,\tau)} := \underbrace{\sum_i \left| U_{c_i}^{(t)} - \sum_j w_{ij}^{(t)} \right|}_{\text{Error in row marginals}} + \underbrace{\sum_j \left| V_{p_j}^{(t)} - \sum_i w_{ij}^{(t)} \right|}_{\text{Error in column marginals}}, \quad (41)$$

998 which sums up the errors in the row (CBG) and column (POI) marginals of the visit matrix  $W^{(t,\tau)}$   
 999 from the  $\tau$ -th iteration of IPFP. Each iteration of IPFP monotonically reduces this  $L_1$ -error  $E^{(t,\tau)}$ ,  
 1000 i.e.,  $E^{(t,\tau)} \geq E^{(t,\tau+1)}$  for all  $\tau \geq 0$ .<sup>78</sup> In other words, the row and column sums of  $W^{(t,\tau)}$  (which  
 1001 is initialized as  $W^{(t,0)} = \bar{W}$ ) progressively get closer to (or technically, no further from) the target  
 1002 marginals as the iteration number  $\tau$  increases. Moreover, IPFP maintains the cross-product ratios  
 1003 of the aggregate matrix  $\bar{W}$ , i.e.,

$$\frac{w_{ij}^{(t,\tau)} w_{kl}^{(t,\tau)}}{w_{i\ell}^{(t,\tau)} w_{kj}^{(t,\tau)}} = \frac{\bar{w}_{ij} \bar{w}_{kl}}{\bar{w}_{i\ell} \bar{w}_{kj}} \quad (42)$$

1004 for all matrix entries indexed by  $i, j, k, \ell$ , for all  $t$ , and for all iterations  $\tau$ .

1005 IPFP converges to a unique solution, in the sense that  $W^{(t)} = \lim_{\tau \rightarrow \infty} W^{(t,\tau)}$ , if there exists  
 1006 a matrix  $W^{(t)}$  that fits the row and column marginals while maintaining the sparsity pattern (i.e.,  
 1007 location of zeroes) of  $\bar{W}$ .<sup>78</sup> If IPFP converges, then the  $L_1$ -error also converges to 0 as  $\tau \rightarrow \infty$ ,<sup>78</sup>

1008 and  $W^{(t)}$  is the maximum likelihood solution in the following sense. For a visit matrix  $W = \{w_{ij}\}$ ,  
 1009 let  $P_W$  represent a multinomial distribution over the  $mn$  entries of  $W$  with probability proportional  
 1010 to  $w_{ij}$ , and define  $\mathcal{U}^{(t)} \subseteq \mathbb{R}_+^{m \times n}$  and  $\mathcal{V}^{(t)} \subseteq \mathbb{R}^{m \times n}$  as the set of non-negative matrices whose row  
 1011 and column marginals match  $U^{(t)}$  and  $V^{(t)}$  respectively. Then, if IPFP converges,

$$W^{(t)} = \arg \min_{W \in \mathcal{U}^{(t)} \cap \mathcal{V}^{(t)}} \text{KL}(P_W \| P_{\bar{W}}), \quad (43)$$

1012 where  $\text{KL}(p||q)$  is the Kullback-Leibler divergence  $\text{KL}(p||q) = \mathbb{E}_p[\log \frac{p(x)}{q(x)}]$ . In other words, IPFP  
 1013 returns a visit matrix  $W^{(t)}$  whose induced distribution  $P_{W^{(t)}}$  is the I-projection of the aggregate  
 1014 visit distribution  $P_{\bar{W}}$  on the set of distributions with compatible row and column marginals.<sup>73</sup> In  
 1015 fact, IPFP can be viewed as an alternating sequence of I-projections onto the row marginals and  
 1016 I-projections onto the column marginals.<sup>73,79</sup>

1017 However, in our setting, IPFP typically does not return a unique solution and instead oscil-  
 1018 lates between two accumulation points, one that fits the row marginals and another that fits the  
 1019 column marginals.<sup>79</sup> This is because  $\bar{W}$  is highly sparse (there is no recorded interaction between  
 1020 most CBGs and POIs), so the marginals are sometimes impossible to reconcile. For example, sup-  
 1021 pose there is some CBG  $c_i$  and POI  $p_j$  such that  $\bar{w}_{ij}$  is the only non-zero entry in the  $i$ -th row and  
 1022  $j$ -th column of  $\bar{W}$ , i.e., visitors from  $c_i$  only travel to  $p_j$  and conversely visitors from  $p_j$  are all  
 1023 from  $c_i$ . Then, if  $U_{c_i}^{(t)} \neq V_{p_j}^{(t)}$ , there does not exist any solution  $W^{(t)}$  such that  $U_{c_i}^{(t)} = V_{p_j}^{(t)} = w_{ij}^{(t)}$ .  
 1024 Note that in this scenario, IPFP still monotonically decreases the  $L_1$ -error.<sup>78</sup>

1025 In our implementation (Algorithm 1), we take  $\tau_{\max} = 100$ , so IPFP ends by fitting the column  
 1026 (POI) marginals. This ensures that our visit matrix  $W^{(t)}$  is fully compatible with the POI marginals  
 1027  $V^{(t)}$ , i.e.,

$$V_{p_j}^{(t)} = \sum_{i=1}^m w_{ij}^{(t)}, \quad (44)$$

while still minimizing the  $L_1$ -error  $E^{(t,\tau)}$  with respect to the CBG marginals  $U^{(t)}$ . Empirically, we  
 find that  $\tau_{\max} = 100$  iterations of IPFP are sufficient to converge to this oscillatory regime.

## Supplementary tables

| Category                               | % visits | % POIs |
|----------------------------------------|----------|--------|
| Full-Service Restaurants               | 14.82%   | 10.86% |
| Limited-Service Restaurants            | 8.08%    | 3.69%  |
| Elementary and Secondary Schools       | 6.36%    | 3.06%  |
| Other General Stores                   | 5.97%    | 1.37%  |
| Gas Stations                           | 4.56%    | 2.94%  |
| Fitness Centers                        | 4.55%    | 2.98%  |
| Grocery Stores                         | 4.16%    | 2.17%  |
| Cafes & Snack Bars                     | 4.01%    | 2.70%  |
| Hotels & Motels                        | 2.93%    | 1.57%  |
| Religious Organizations                | 2.31%    | 5.04%  |
| Parks & Similar Institutions           | 1.93%    | 2.31%  |
| Hardware Stores                        | 1.79%    | 1.87%  |
| Department Stores                      | 1.78%    | 0.32%  |
| Child Day Care Services                | 1.71%    | 2.76%  |
| Offices of Physicians                  | 1.63%    | 4.02%  |
| Pharmacies & Drug Stores               | 1.54%    | 0.95%  |
| Sporting Goods Stores                  | 1.16%    | 1.05%  |
| Automotive Parts Stores                | 1.16%    | 1.80%  |
| Used Merchandise Stores                | 1.15%    | 1.01%  |
| Colleges & Universities                | 1.12%    | 0.44%  |
| Convenience Stores                     | 1.09%    | 0.66%  |
| Pet Stores                             | 0.93%    | 0.85%  |
| New Car Dealers                        | 0.73%    | 0.43%  |
| Hobby & Toy Stores                     | 0.73%    | 0.36%  |
| Offices of Dentists                    | 0.70%    | 2.67%  |
| Commercial Banking                     | 0.70%    | 2.05%  |
| Gift Stores                            | 0.69%    | 0.57%  |
| Liquor Stores                          | 0.61%    | 0.82%  |
| Women's Clothing Stores                | 0.59%    | 1.00%  |
| Home Health Care Services              | 0.55%    | 1.02%  |
| Furniture Stores                       | 0.53%    | 0.89%  |
| Electronics Stores                     | 0.51%    | 0.72%  |
| Used Car Dealers                       | 0.50%    | 1.08%  |
| Book Stores                            | 0.49%    | 0.32%  |
| Musical Instrument Stores              | 0.49%    | 0.50%  |
| Optical Goods Stores                   | 0.47%    | 0.76%  |
| Family Clothing Stores                 | 0.46%    | 0.49%  |
| Car Repair Shops                       | 0.41%    | 1.83%  |
| Offices of Mental Health Practitioners | 0.41%    | 1.05%  |
| Tobacco Stores                         | 0.41%    | 0.31%  |
| Office Supplies                        | 0.40%    | 0.33%  |
| Beauty Salons                          | 0.39%    | 1.58%  |
| Paint and Wallpaper Stores             | 0.38%    | 0.56%  |
| Other Gas Stations                     | 0.37%    | 0.20%  |
| Sports Teams and Clubs                 | 0.37%    | 0.03%  |
| Cosmetics & Beauty Stores              | 0.36%    | 0.71%  |
| Jewelry Stores                         | 0.34%    | 0.60%  |
| Junior Colleges                        | 0.34%    | 0.07%  |
| Sewing & Piece Goods Stores            | 0.34%    | 0.39%  |
| Senior Homes                           | 0.34%    | 0.41%  |
| Libraries & Archives                   | 0.3%     | 0.3%   |

**Table S1:** The 50 POI subcategories accounting for the largest fraction of visits in the full SafeGraph dataset. Collectively they account for 88% of POI visits and 76% of POIs.

| MSA           | 7 days earlier       | 3 days earlier       | 3 days later         | 7 days later         |
|---------------|----------------------|----------------------|----------------------|----------------------|
| Atlanta       | 0.586 (0.397, 0.834) | 0.803 (0.639, 0.956) | 1.359 (1.075, 1.741) | 1.981 (1.189, 2.761) |
| Chicago       | 0.641 (0.563, 0.711) | 0.848 (0.769, 0.933) | 1.226 (1.143, 1.365) | 1.542 (1.446, 1.639) |
| Dallas        | 0.642 (0.495, 0.782) | 0.855 (0.693, 1.013) | 1.298 (1.09, 1.577)  | 1.722 (1.487, 1.966) |
| Houston       | 0.656 (0.500, 0.812) | 0.848 (0.663, 1.021) | 1.288 (1.079, 1.541) | 1.731 (1.493, 2.064) |
| Los Angeles   | 0.608 (0.407, 0.848) | 0.816 (0.639, 0.984) | 1.265 (1.041, 1.554) | 1.692 (1.216, 2.137) |
| Miami         | 0.576 (0.424, 0.795) | 0.792 (0.669, 0.919) | 1.317 (1.117, 1.559) | 1.856 (1.281, 2.27)  |
| New York City | 0.818 (0.795, 0.856) | 0.909 (0.890, 0.927) | 1.113 (1.094, 1.133) | 1.27 (1.246, 1.307)  |
| Philadelphia  | 0.799 (0.731, 0.868) | 0.916 (0.823, 1.005) | 1.12 (1.031, 1.206)  | 1.287 (1.246, 1.351) |
| San Francisco | 0.609 (0.408, 0.798) | 0.815 (0.666, 1.012) | 1.271 (1.048, 1.527) | 1.689 (1.452, 2.029) |
| Washington DC | 0.671 (0.447, 0.879) | 0.848 (0.627, 1.045) | 1.207 (0.959, 1.586) | 1.488 (1.158, 1.789) |

**Table S2: What if people had begun mobility reductions earlier or later?** We report the expected ratio of the number of infections predicted under the counterfactual to the number of infections predicted using observed mobility data; a ratio lower than 1 means that fewer infections occurred under the counterfactual. The numbers in parentheses indicate the 2.5th and 97.5th percentiles across sampled parameters and stochastic realizations. See Methods [M6](#) for details.

| MSA           | 0%                      | 25%                  | 50%                  |
|---------------|-------------------------|----------------------|----------------------|
| Atlanta       | 16.593 (3.088, 30.532)  | 7.714 (1.73, 15.833) | 2.265 (1.17, 3.673)  |
| Chicago       | 6.202 (5.2, 7.088)      | 3.329 (2.761, 3.759) | 1.587 (1.421, 1.704) |
| Dallas        | 18.026 (10.361, 27.273) | 5.908 (3.75, 8.857)  | 1.87 (1.532, 2.349)  |
| Houston       | 18.964 (11.949, 32.755) | 5.725 (3.761, 9.233) | 1.659 (1.362, 2.109) |
| Los Angeles   | 12.926 (3.15, 24.207)   | 5.097 (1.779, 9.721) | 1.665 (1.176, 2.309) |
| Miami         | 10.781 (3.382, 15.935)  | 4.85 (1.886, 7.405)  | 1.777 (1.208, 2.3)   |
| New York City | 2.037 (1.902, 2.174)    | 1.73 (1.603, 1.811)  | 1.333 (1.258, 1.389) |
| Philadelphia  | 2.976 (2.734, 3.39)     | 1.894 (1.747, 2.137) | 1.211 (1.141, 1.305) |
| San Francisco | 9.743 (7.089, 15.596)   | 4.282 (3.124, 6.781) | 1.714 (1.427, 2.255) |
| Washington DC | 5.85 (2.329, 9.713)     | 3.032 (1.541, 4.646) | 1.509 (1.132, 1.959) |

**Table S3: What if the magnitude of mobility reduction changed?** Each column represents a counterfactual scenario where the magnitude of mobility reduction is only a some percentage of the observed mobility reduction, i.e., 0% corresponds to no mobility reduction, and 100% corresponds to the real, observed level of mobility reduction. We report the expected ratio of the number of infections predicted under the counterfactual to the number of infections predicted using observed mobility data; a ratio lower than 1 means that fewer infections occurred under the counterfactual. The numbers in parentheses indicate the 2.5th and 97.5th percentiles across sampled parameters and stochastic realizations. See Methods [M6](#) for details.

|                             | Atlanta | Chicago | Dallas | Houst. | LA    | Miami | NY    | Phila. | SF    | DC     | Median |
|-----------------------------|---------|---------|--------|--------|-------|-------|-------|--------|-------|--------|--------|
| Full-Service Restaurants    | 0.764   | 1.204   | 0.956  | 1.000  | 1.445 | 1.232 | 2.035 | 2.883  | 1.758 | 1.171  | 1.218  |
| Limited-Service Restaurants | 0.940   | 0.950   | 1.002  | 0.906  | 1.067 | 0.872 | 1.901 | 1.614  | 0.994 | 0.962  | 0.978  |
| Other General Stores        | 0.782   | 1.083   | 0.957  | 0.729  | 0.760 | 0.894 | 1.218 | 1.312  | 1.045 | 0.950  | 0.954  |
| Gas Stations                | 1.326   | 1.865   | 1.310  | 1.515  | 2.254 | 2.195 | 1.899 | 6.461  | 1.357 | 1.870  | 1.868  |
| Fitness Centers             | 0.536   | 0.907   | 0.708  | 0.670  | 1.461 | 0.789 | 1.151 | 1.516  | 0.995 | 1.160  | 0.951  |
| Grocery Stores              | 0.948   | 3.080   | 0.838  | 1.333  | 2.408 | 1.498 | 4.984 | 10.437 | 2.478 | 1.977  | 2.192  |
| Cafes & Snack Bars          | 1.385   | 0.919   | 0.716  | 1.120  | 1.327 | 2.168 | 1.943 | 1.757  | 0.982 | 0.932  | 1.224  |
| Hotels & Motels             | 1.228   | 1.200   | 0.814  | 0.804  | 1.229 | 1.134 | 1.260 | 1.993  | 1.199 | 1.346  | 1.214  |
| Religious Organizations     | 1.546   | 1.763   | 0.956  | 0.919  | 1.746 | 1.464 | 1.756 | 1.736  | 1.515 | 1.852  | 1.641  |
| Hardware Stores             | 3.938   | 3.340   | 1.575  | 2.111  | 1.333 | 0.939 | 3.553 | 6.716  | 4.202 | 13.560 | 3.446  |
| Department Stores           | 1.132   | 1.230   | 0.978  | 0.911  | 1.083 | 1.431 | 1.667 | 0.976  | 0.867 | 1.042  | 1.062  |
| Offices of Physicians       | 1.235   | 0.721   | 0.667  | 1.036  | 1.141 | 1.687 | 1.307 | 1.319  | 1.193 | 0.445  | 1.167  |
| Pharmacies & Drug Stores    | 1.636   | 1.389   | 1.176  | 0.854  | 1.718 | 1.555 | 2.577 | 5.624  | 1.200 | 1.699  | 1.596  |
| Sporting Goods Stores       | 0.936   | 1.540   | 1.129  | 0.812  | 1.168 | 0.700 | 1.253 | 1.161  | 0.826 | 2.777  | 1.145  |
| Automotive Parts Stores     | 0.890   | 1.707   | 0.862  | 1.086  | 1.990 | 1.414 | 1.524 | 2.697  | 1.753 | 1.246  | 1.469  |
| Used Merchandise Stores     | 0.993   | 0.931   | 1.000  | 1.315  | 1.017 | 1.074 | 1.352 | 1.668  | 1.587 | 0.814  | 1.046  |
| Convenience Stores          | 1.208   | 0.932   | 1.613  | 0.647  | 0.838 | 0.824 | 1.736 | 2.322  | 1.086 | 1.428  | 1.147  |
| Pet Stores                  | 1.260   | 0.820   | 1.192  | 1.487  | 1.536 | 0.776 | 3.558 | 1.652  | 2.124 | 0.905  | 1.374  |
| New Car Dealers             | 2.036   | 1.471   | 0.741  | 0.809  | 1.180 | 1.377 | 2.022 | 1.129  | 0.395 | 0.872  | 1.154  |
| Hobby & Toy Stores          | 1.168   | 1.110   | 1.165  | 0.853  | 1.771 | 1.520 | 1.525 | 1.088  | 0.883 | 0.926  | 1.138  |
| <b>Median</b>               | 1.188   | 1.202   | 0.968  | 0.915  | 1.330 | 1.305 | 1.746 | 1.702  | 1.196 | 1.166  |        |

**Table S4: Transmission rate disparities at each POI category between income groups.** We report the ratio of the average transmission rate encountered by visitors from CBGs in the bottom income decile to that for the top income decile. A ratio greater than 1 means that visitors from CBGs in the bottom income decile experienced higher (more dangerous) transmission rates. See Methods [M6](#) for details.

|                             | Atlanta | Chicago | Dallas | Houst. | LA    | Miami | NY    | Phila. | SF     | DC     | Median |
|-----------------------------|---------|---------|--------|--------|-------|-------|-------|--------|--------|--------|--------|
| Full-Service Restaurants    | 0.802   | 1.354   | 0.981  | 0.965  | 1.065 | 1.167 | 2.418 | 2.661  | 1.223  | 1.013  | 1.116  |
| Limited-Service Restaurants | 0.940   | 1.144   | 1.028  | 0.940  | 0.820 | 0.919 | 2.136 | 1.523  | 0.799  | 1.346  | 0.984  |
| Other General Stores        | 0.776   | 1.277   | 0.838  | 0.841  | 1.527 | 1.132 | 2.158 | 1.313  | 0.925  | 1.312  | 1.204  |
| Gas Stations                | 1.402   | 1.891   | 1.389  | 1.190  | 1.336 | 1.857 | 1.818 | 2.286  | 2.321  | 1.316  | 1.610  |
| Fitness Centers             | 0.607   | 1.167   | 0.670  | 0.831  | 0.780 | 1.066 | 1.447 | 1.977  | 1.103  | 1.205  | 1.084  |
| Grocery Stores              | 0.589   | 3.664   | 0.613  | 1.195  | 2.386 | 0.950 | 5.864 | 13.705 | 2.243  | 2.262  | 2.252  |
| Cafes & Snack Bars          | 1.308   | 1.104   | 0.845  | 0.840  | 0.976 | 2.619 | 1.767 | 2.456  | 1.045  | 0.867  | 1.074  |
| Hotels & Motels             | 0.977   | 1.007   | 1.366  | 0.718  | 1.112 | 1.024 | 1.449 | 2.494  | 0.654  | 0.899  | 1.015  |
| Religious Organizations     | 0.938   | 1.606   | 1.060  | 0.953  | 2.096 | 1.795 | 1.933 | 2.040  | 1.674  | 1.188  | 1.640  |
| Hardware Stores             | 0.909   | 3.900   | 1.523  | 1.461  | 1.952 | 0.586 | 5.032 | 3.898  | 11.103 | 13.432 | 2.925  |
| Department Stores           | 1.081   | 1.301   | 0.805  | 0.777  | 0.992 | 2.337 | 2.479 | 1.357  | 1.089  | 1.402  | 1.195  |
| Offices of Physicians       | 0.894   | 1.323   | 1.006  | 1.415  | 0.898 | 1.117 | 1.652 | 2.073  | 0.694  | 1.911  | 1.220  |
| Pharmacies & Drug Stores    | 0.888   | 1.376   | 0.930  | 0.732  | 1.538 | 1.674 | 3.315 | 3.366  | 1.135  | 1.715  | 1.457  |
| Sporting Goods Stores       | 0.767   | 0.674   | 0.650  | 0.506  | 1.946 | 0.818 | 1.532 | 2.152  | 0.880  | 1.715  | 0.849  |
| Automotive Parts Stores     | 1.049   | 1.479   | 1.010  | 1.353  | 2.998 | 2.657 | 1.740 | 3.387  | 1.646  | 0.601  | 1.562  |
| Used Merchandise Stores     | 0.858   | 1.195   | 0.699  | 1.060  | 1.270 | 0.593 | 1.500 | 3.024  | 1.425  | 0.799  | 1.128  |
| Convenience Stores          | 2.016   | 5.055   | 1.272  | 2.188  | 0.761 | 0.902 | 1.911 | 2.276  | 1.239  | 1.844  | 1.878  |
| Pet Stores                  | 0.925   | 1.624   | 0.724  | 1.465  | 1.506 | 0.881 | 2.715 | 10.182 | 1.568  | 2.408  | 1.537  |
| New Car Dealers             | 1.008   | 1.398   | 0.812  | 0.736  | 0.942 | 0.998 | 1.977 | 0.866  | 0.772  | 0.383  | 0.904  |
| Hobby & Toy Stores          | 2.569   | 0.853   | 0.628  | 0.979  | 1.373 | 1.388 | 2.237 | 0.825  | 0.864  | 1.286  | 1.132  |
| <b>Median</b>               | 0.932   | 1.339   | 0.888  | 0.959  | 1.303 | 1.092 | 1.955 | 2.281  | 1.119  | 1.314  |        |

**Table S5: Transmission rate disparities at each POI category between racial groups.** We report the ratio of the average transmission rate encountered by visitors from CBGs with the lowest (bottom decile) proportion of white residents versus that for the top decile. A ratio greater than 1 means that visitors from CBGs in the bottom decile experienced higher (more dangerous) transmission rates. See Methods [M6](#) for details.



| Google category     | Google description   | NAICS categories                                           |
|---------------------|----------------------|------------------------------------------------------------|
| Retail & recreation | Restaurants          | Full-Service Restaurants                                   |
|                     | Cafes                | Limited-Service Restaurants                                |
|                     | Shopping centers     | Snack and Nonalcoholic Beverage Bars                       |
|                     | Theme parks          | Drinking Places (Alcoholic Beverages)                      |
|                     | Museums              | Malls, Amusement and Theme Parks                           |
|                     | Libraries            | Museums, Libraries and Archives                            |
|                     | Movie theaters       | Motion Picture Theaters (except Drive-Ins)                 |
| Grocery & pharmacy  | Grocery markets      | Supermarkets and Other Grocery (except Convenience) Stores |
|                     | Food warehouses      | Food (Health) Supplement Stores                            |
|                     | Farmers markets      | Fish and Seafood Markets                                   |
|                     | Specialty food shops | All Other Specialty Food Stores                            |
|                     | Drug stores          | Pharmacies and Drug Stores                                 |
|                     | Pharmacies           |                                                            |

**Table S6: Mapping of Google mobility data categories to NAICS categories.** Google descriptions taken from [https://www.google.com/covid19/mobility/data\\_documentation.html](https://www.google.com/covid19/mobility/data_documentation.html).

| State          | Retail & recreation | Grocery & pharmacy | Residential |
|----------------|---------------------|--------------------|-------------|
| California     | 0.947               | 0.834              | 0.876       |
| Delaware       | 0.957               | 0.847              | 0.856       |
| Florida        | 0.963               | 0.814              | 0.885       |
| Georgia        | 0.948               | 0.682              | 0.868       |
| Illinois       | 0.964               | 0.710              | 0.899       |
| Indiana        | 0.956               | 0.741              | 0.877       |
| Maryland       | 0.956               | 0.825              | 0.886       |
| New Jersey     | 0.951               | 0.720              | 0.935       |
| New York       | 0.958               | 0.763              | 0.909       |
| Pennsylvania   | 0.971               | 0.850              | 0.875       |
| Texas          | 0.965               | 0.789              | 0.886       |
| Virginia       | 0.967               | 0.840              | 0.877       |
| Washington, DC | 0.959               | 0.889              | 0.780       |
| West Virginia  | 0.960               | 0.740              | 0.814       |
| Wisconsin      | 0.967               | 0.783              | 0.886       |
| <b>Median</b>  | 0.959               | 0.789              | 0.877       |

**Table S7: Pearson correlations between the Google and SafeGraph mobility timeseries.** We report correlations over the period of March 1–May 2, 2020 for the 15 states that we model. See SI Section S1 for details.

| MSA           | # sets | $\beta_{\text{base}}$ | $\psi$            | $p_0$                                                          |
|---------------|--------|-----------------------|-------------------|----------------------------------------------------------------|
| Atlanta       | 16     | 0.004 (0.001, 0.014)  | 2388 (515, 3325)  | $5 \times 10^{-4}$ ( $1 \times 10^{-4}$ , $2 \times 10^{-3}$ ) |
| Chicago       | 4      | 0.009 (0.006, 0.011)  | 1764 (1139, 2076) | $2 \times 10^{-4}$ ( $2 \times 10^{-4}$ , $5 \times 10^{-4}$ ) |
| Dallas        | 5      | 0.009 (0.004, 0.011)  | 1452 (1139, 2388) | $2 \times 10^{-4}$ ( $1 \times 10^{-4}$ , $2 \times 10^{-4}$ ) |
| Houston       | 8      | 0.001 (0.001, 0.009)  | 2076 (1139, 2076) | $2 \times 10^{-4}$ ( $1 \times 10^{-4}$ , $5 \times 10^{-4}$ ) |
| Los Angeles   | 25     | 0.006 (0.001, 0.016)  | 2076 (515, 3637)  | $2 \times 10^{-4}$ ( $2 \times 10^{-5}$ , $1 \times 10^{-3}$ ) |
| Miami         | 7      | 0.001 (0.001, 0.011)  | 2388 (515, 2388)  | $2 \times 10^{-4}$ ( $2 \times 10^{-4}$ , $2 \times 10^{-3}$ ) |
| New York City | 7      | 0.001 (0.001, 0.009)  | 2700 (1452, 3013) | $1 \times 10^{-4}$ ( $5 \times 10^{-5}$ , $1 \times 10^{-3}$ ) |
| Philadelphia  | 3      | 0.009 (0.001, 0.009)  | 827 (827, 1452)   | $5 \times 10^{-4}$ ( $1 \times 10^{-4}$ , $5 \times 10^{-4}$ ) |
| San Francisco | 5      | 0.006 (0.001, 0.009)  | 1139 (827, 1764)  | $5 \times 10^{-4}$ ( $2 \times 10^{-4}$ , $1 \times 10^{-3}$ ) |
| Washington DC | 17     | 0.016 (0.001, 0.019)  | 515 (515, 3949)   | $5 \times 10^{-4}$ ( $2 \times 10^{-5}$ , $5 \times 10^{-4}$ ) |

**Table S8: Model parameters used for each MSA.** # sets counts the number of parameter sets that are within 20% of the RMSE of the best-fit parameter set, as described in Section M4. For each of  $\beta_{\text{base}}$  (which scales the transmission rates at CBGs),  $\psi$  (which scales the transmission rates at POIs), and  $p_0$  (the initial proportion of infected individuals), we show the best-fit parameter set and, in parentheses, the corresponding minimum and maximum within the 20% threshold.

## Supplementary figures

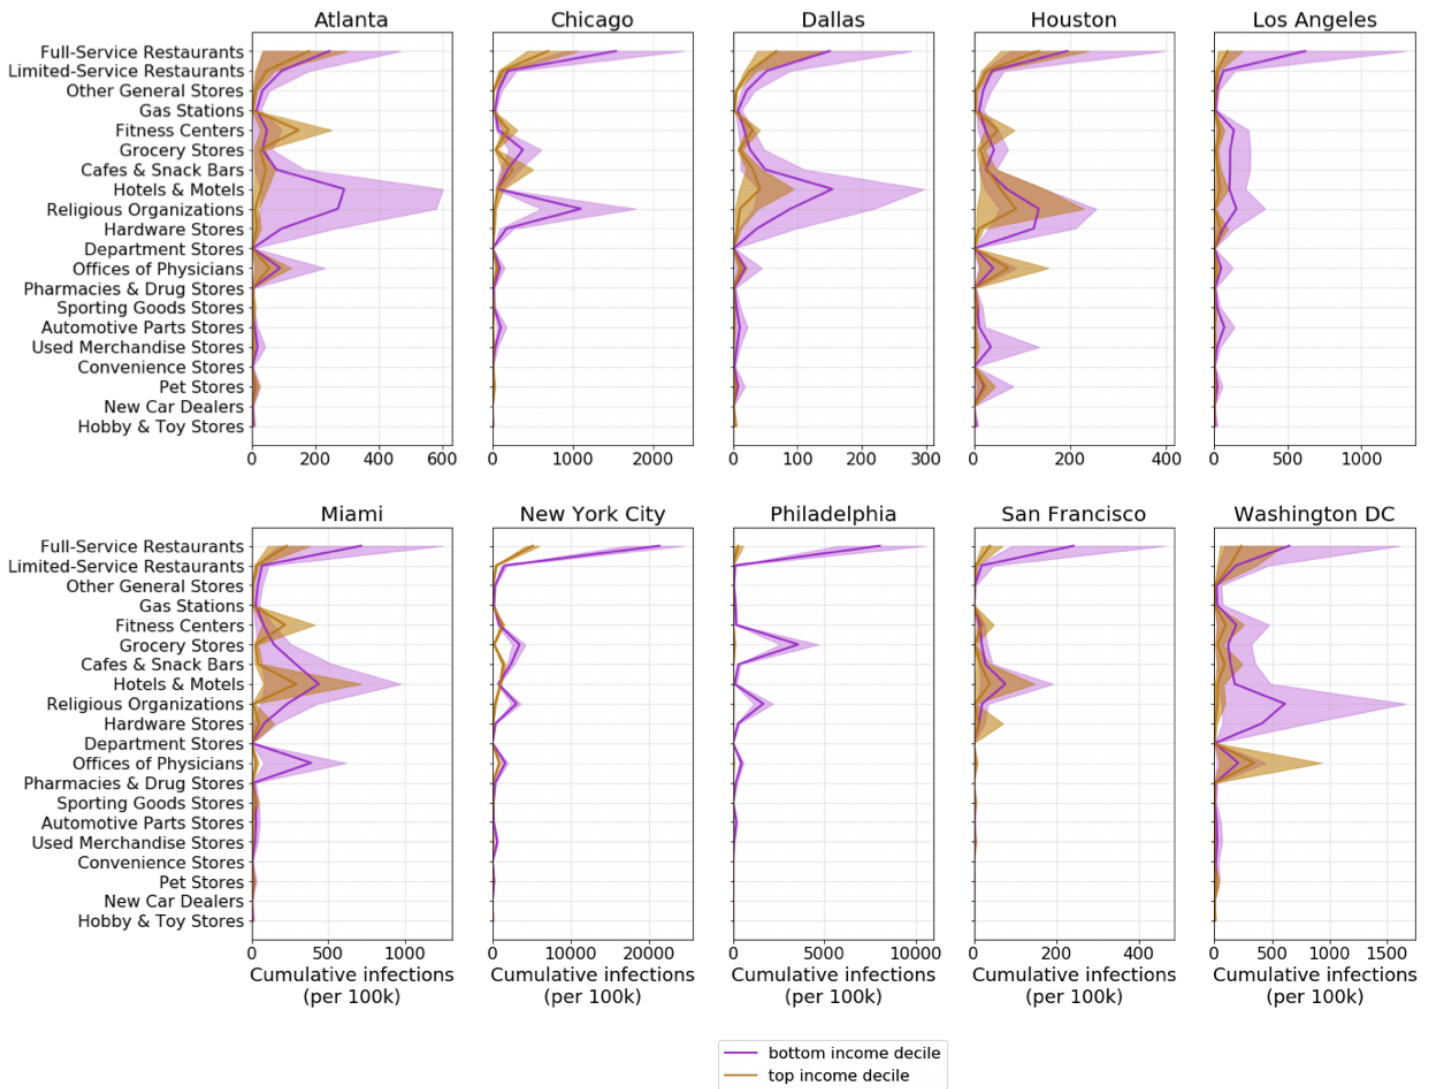

**Figure S1:** For each POI category, we plot the predicted cumulative number of infections (per 100k population) that occurred at that category for CBGs in the bottom- (purple) and top- (gold) income deciles. Shaded regions denote 2.5th and 97.5th percentiles across sampled parameters and stochastic realizations.

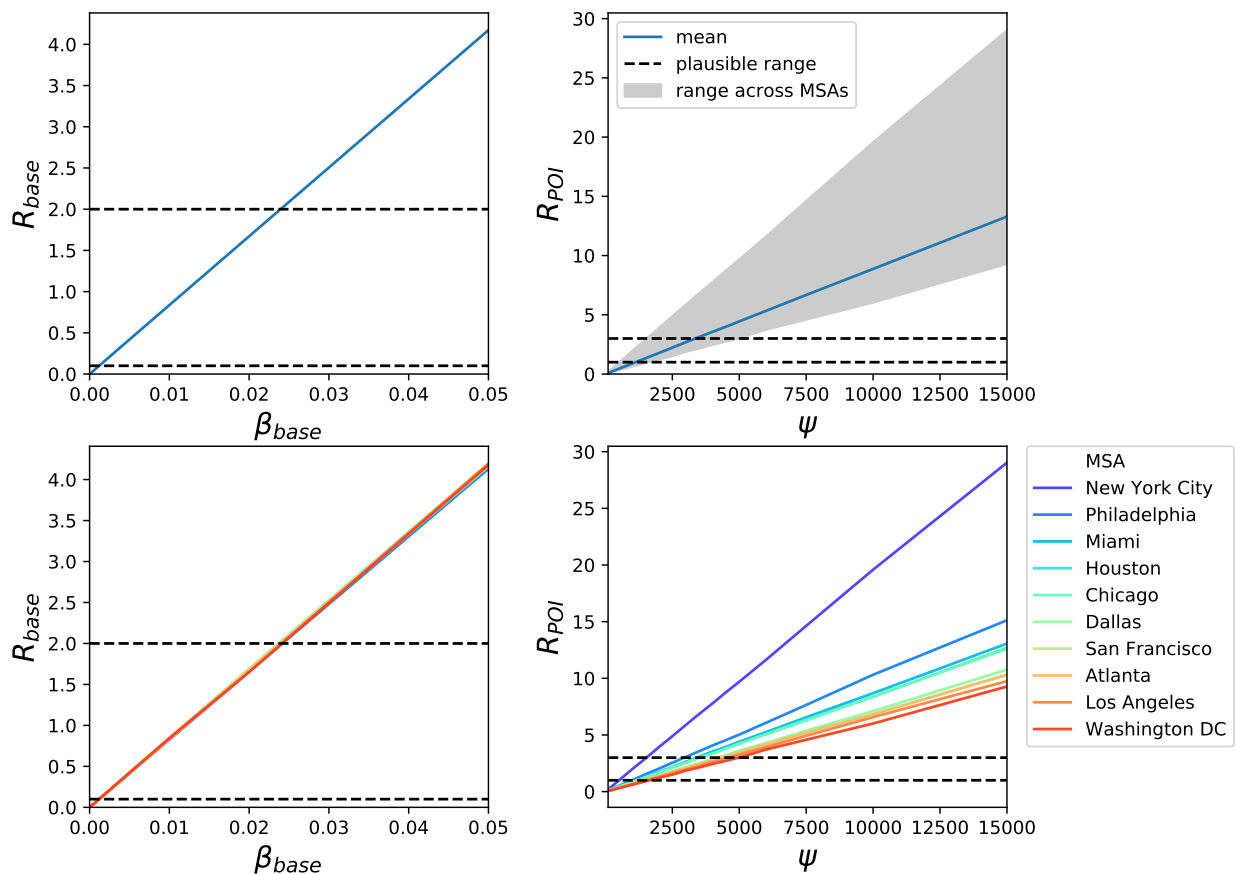

**Figure S2:**  $R_{base}$  and  $R_{POI}$  implied by model parameter settings. In the top two plots, dotted black lines denote plausible ranges from prior work, the blue line shows the mean across MSAs, and the grey shaded area indicates the range across MSAs.  $R_{base}$  does not vary across MSAs because it does not depend on MSA-specific social activity. The bottom two plots show the same results broken down by MSA. See Methods [M4.1](#) for details.

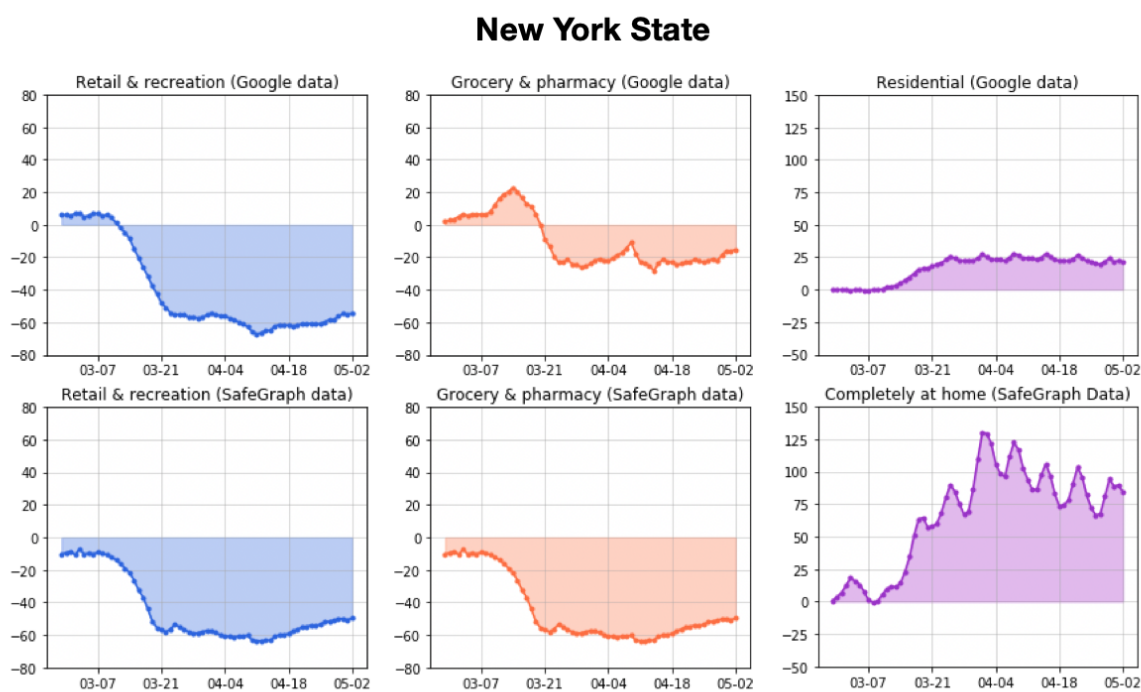

**Figure S3:** Google versus SafeGraph mobility trends for New York state. The y-axis represents mobility levels compared to baseline activity in January and February 2020. For the categories from left to right, the Pearson correlations between the datasets are 0.96, 0.76, and 0.91. See SI Section S1 for details.

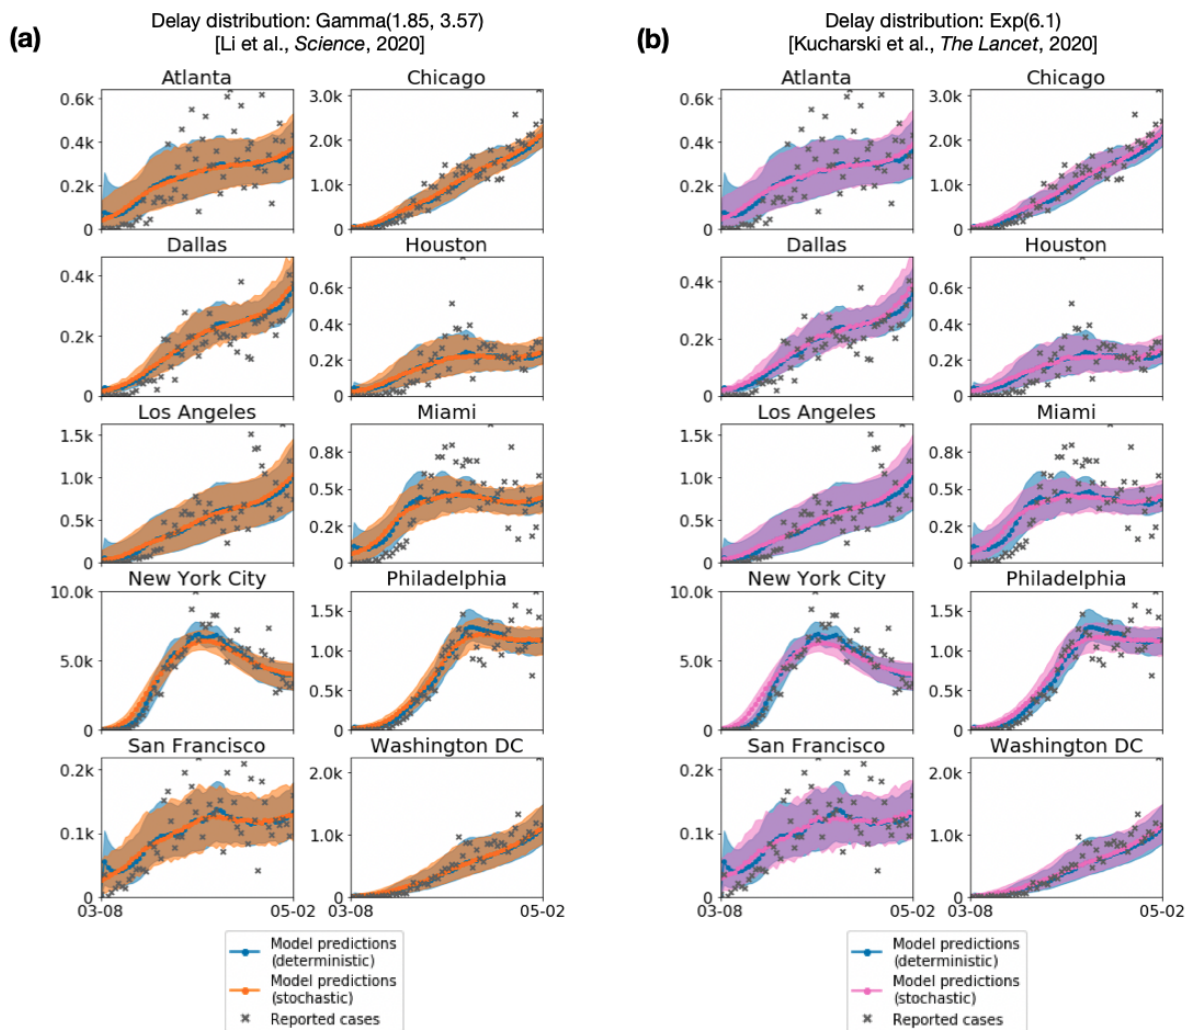

**Figure S4:** Sensitivity analysis on detection rate and delay. Instead of assuming a constant detection rate and constant infectious-to-confirmation delay on cases, we tested sampling the number of confirmed cases and delay distribution stochastically. The number of confirmed cases was sampled from a Binomial distribution, and we tried two different delay distributions that were fitted on empirical line list data, (a) Li et al.<sup>22</sup> and (b) Kucharski et al.<sup>43</sup> (For more details, see Methods M5.4.) For both delay distributions, we find that model predictions under the stochastic setting are highly similar to the predictions made under the constant rate and delay setting (labeled as “deterministic” in the plot). Note that the “deterministic” and “stochastic” labels only apply to the computation of confirmed cases from infectious individuals to confirmed cases; the underlying SEIR models are all stochastic, as described in Methods M3.

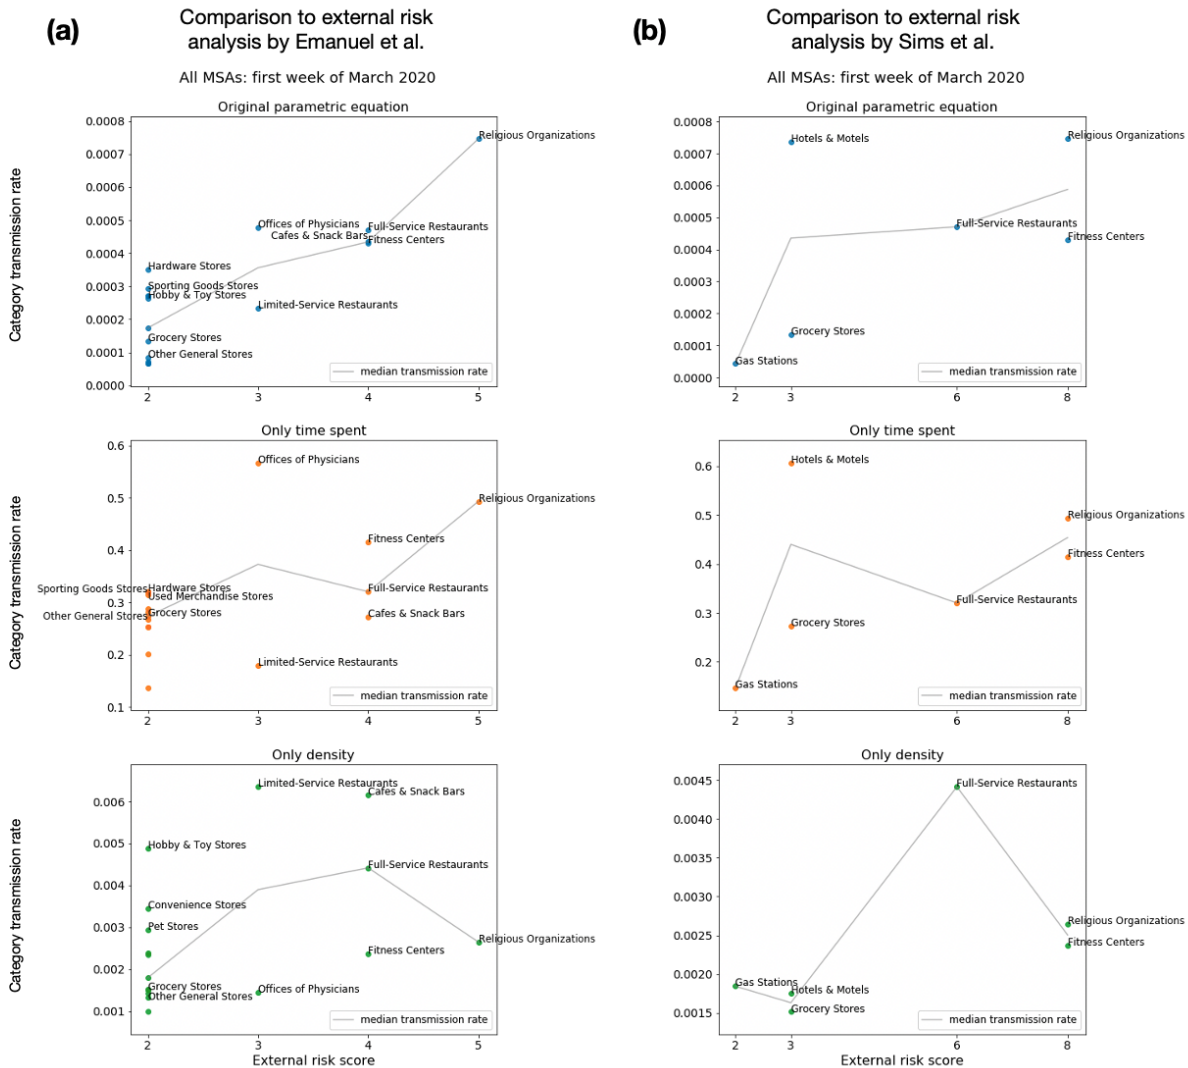

**Figure S5:** Sensitivity analysis on the parametric form for transmission rate. Our model assumes that POI transmission rates depend on two factors: time spent at the POI and the density of individuals per square foot. We tested this assumption by computing an alternate transmission rate that only included time spent (removing density) and another version that only included density (removing time spent); see Section M5.2 for details. We found that the relative risks predicted by our original transmission rate formula concurred best with the assessments of risk proposed by independent epidemiological experts.<sup>64,65</sup> The x-axis represents their proposed risk scores; some scores are missing (e.g., 3 and 4 on the right) because there was no overlap between the categories they assigned that score and categories that we analyzed. The y-axis represents each category’s predicted average transmission rate in the first week of March, taking the median over MSAs. Due to space constraints, only a subset of the categories scored at 2 by Emanuel et al. (left) are labeled – the labels are reserved for either the 2 most visited categories in this group (Grocery Stores and Other General Stores) and/or the 3 categories with highest predicted transmission rates within the group.

## Chicago MSA

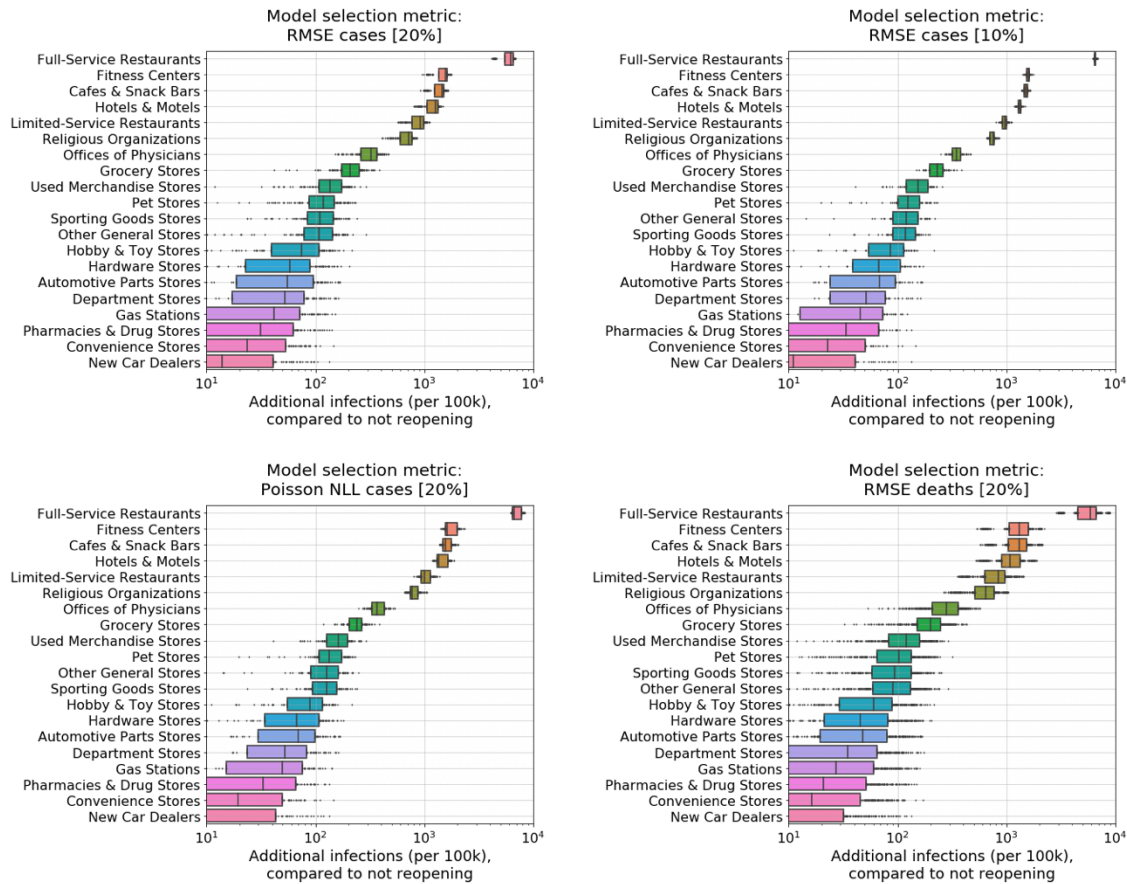

**Figure S6:** Sensitivity analysis on model calibration metrics and reopening risks. We conducted a sensitivity analysis on which metric was used for model calibration, comparing our default metric (top left) to three other metrics (Methods M5.5). We ran our reopening experiments forward with the model parameters selected by each metric. The predicted ranking of risk from reopening different POI categories remains consistent across all metrics.



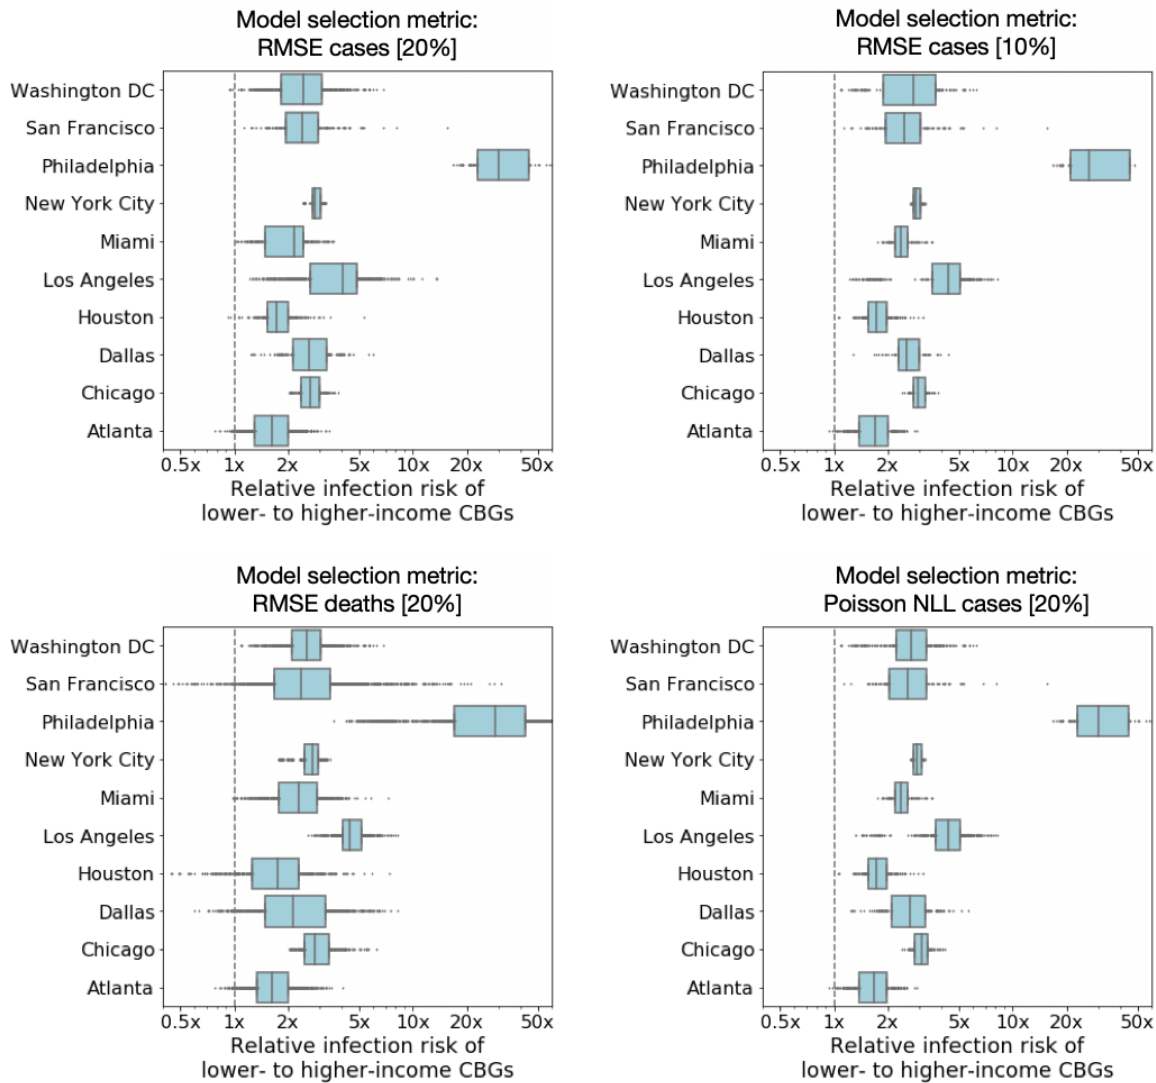

**Figure S7:** Sensitivity analysis on model calibration metrics and predicted socioeconomic disparities. We conducted a sensitivity analysis on which metric was used for model calibration, comparing our default metric (top left) to three other metrics (Methods M5.5). We then analyzed the socioeconomic disparities in each MSA predicted by the model parameters selected by each metric. The predicted disparities remain remarkably consistent across all metrics, and, for every metric, the best fit models predict that lower-income CBGs are at higher infection risk.

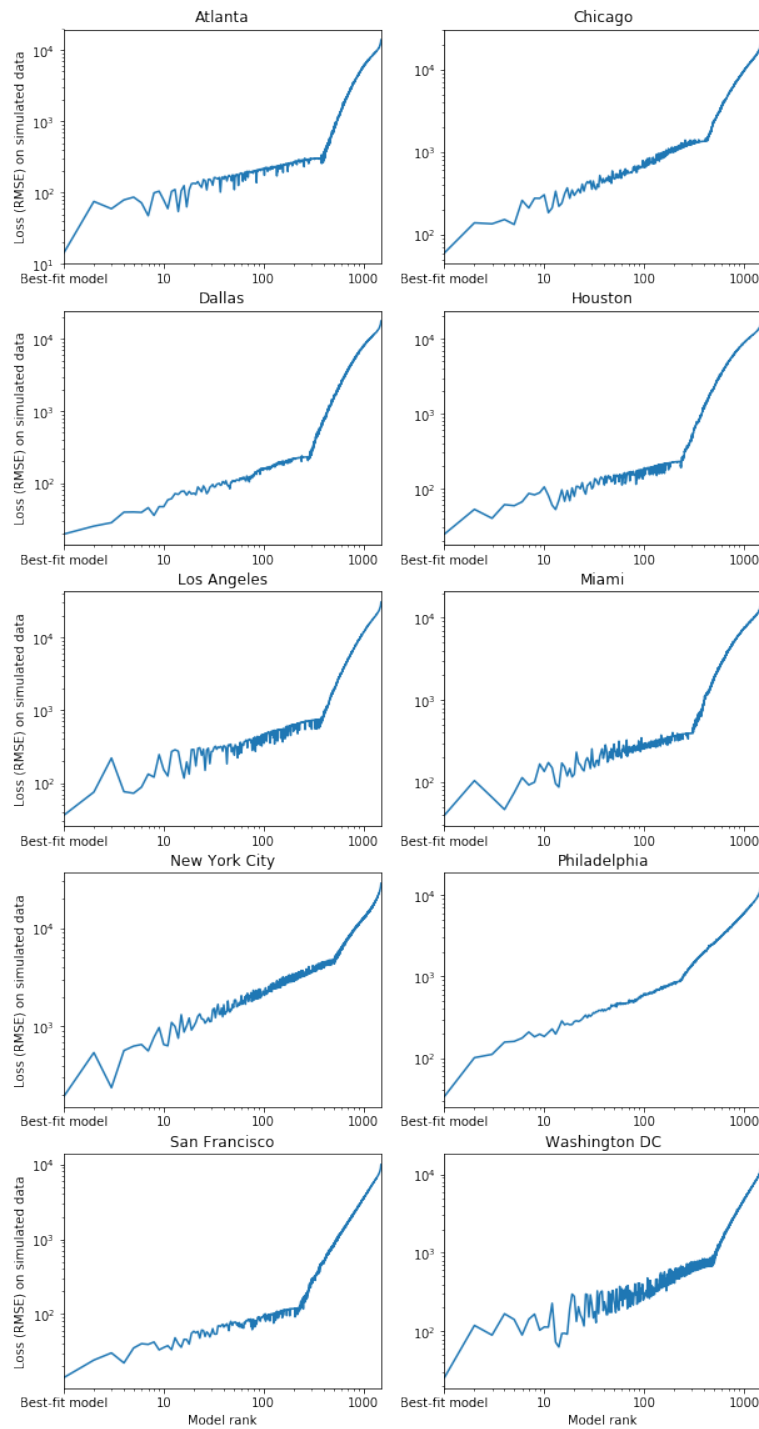

**Figure S8:** Assessing model identifiability on simulated data. The horizontal axis ranks grid search parameter settings by how well they fit real data (measured by RMSE to daily case count), with the best-fit parameter settings on the left. The vertical axis plots plots RMSE on simulated case count data generated using the best-fit parameter settings. For all 10 MSAs, the parameters that obtain the lowest RMSE on the simulated data are always the true parameters that were used to generate that data (as shown by the left-most point on the plot). This demonstrates that the model and fitting procedure can correctly recover the true parameters on simulated data. Methods [M5.3](#) provides more details.

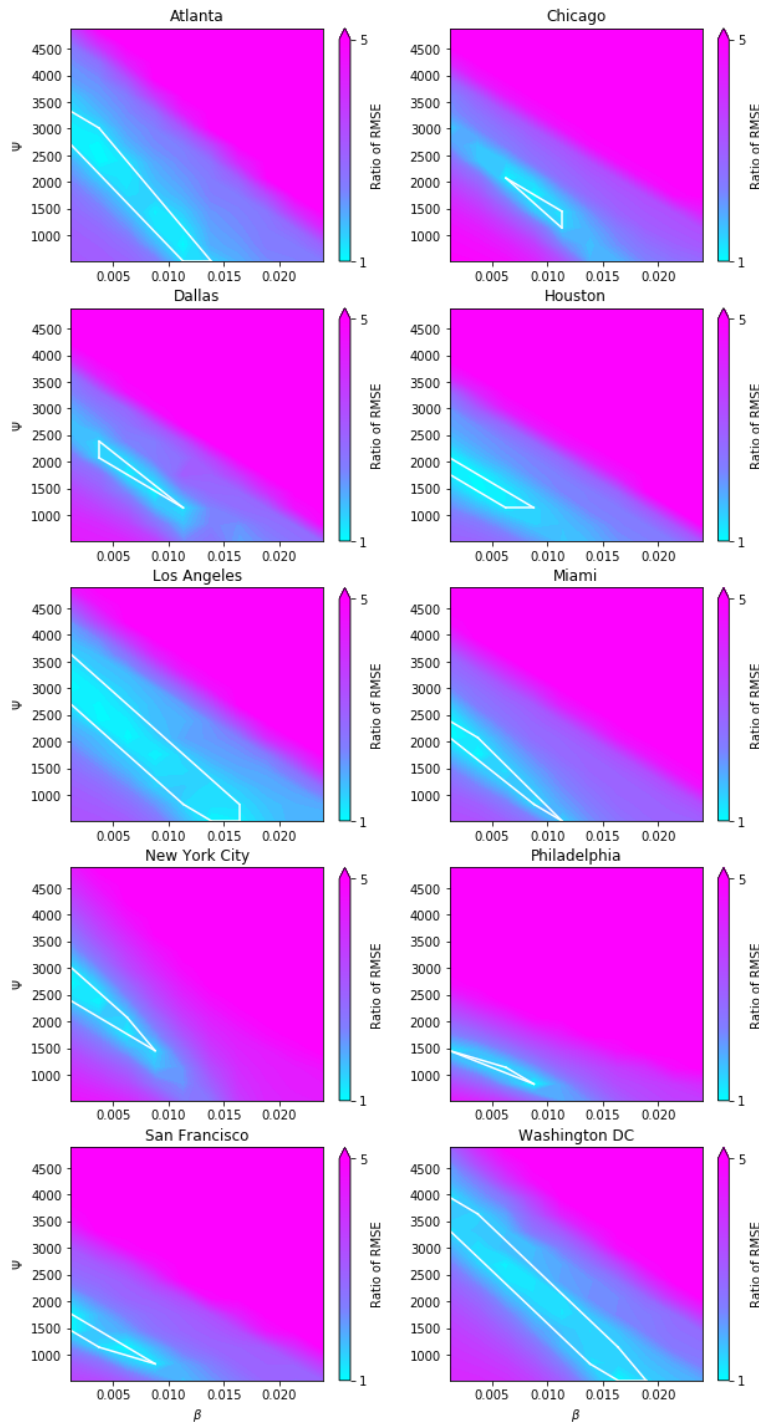

**Figure S9:** RMSE on daily case count data as a function of parameters  $\beta_{\text{base}}$  (horizontal axis) and  $\psi$  (vertical axis). Color indicates the ratio of RMSE to that of the best-fit model. The white polygon shows the convex hull of the parameter settings used to generate results: i.e., all models with an RMSE less than  $1.2\times$  that of the best-fit model. For all parameter combinations, we take the minimum RMSE over  $p_0$ . Methods M5.3 provides more details.

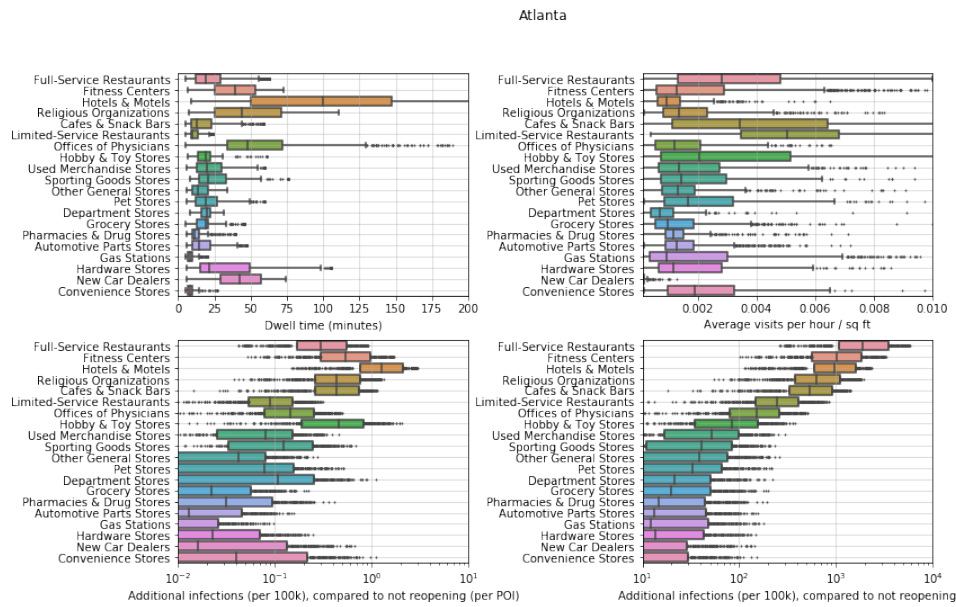

**Figure S10:** POI attributes in Atlanta. The top two plots show the distribution of dwell time and the average number of hourly visitors divided by the area of the POI in square feet. Each point represents one POI; boxes depict the interquartile range across POIs. The bottom two plots show predictions for the increase in infections (per 100,000 people) from reopening a POI category: per POI (left bottom) and for the category as a whole (right bottom). Each point represents one model realization; boxes depict the interquartile range across sampled parameters and stochastic realizations.

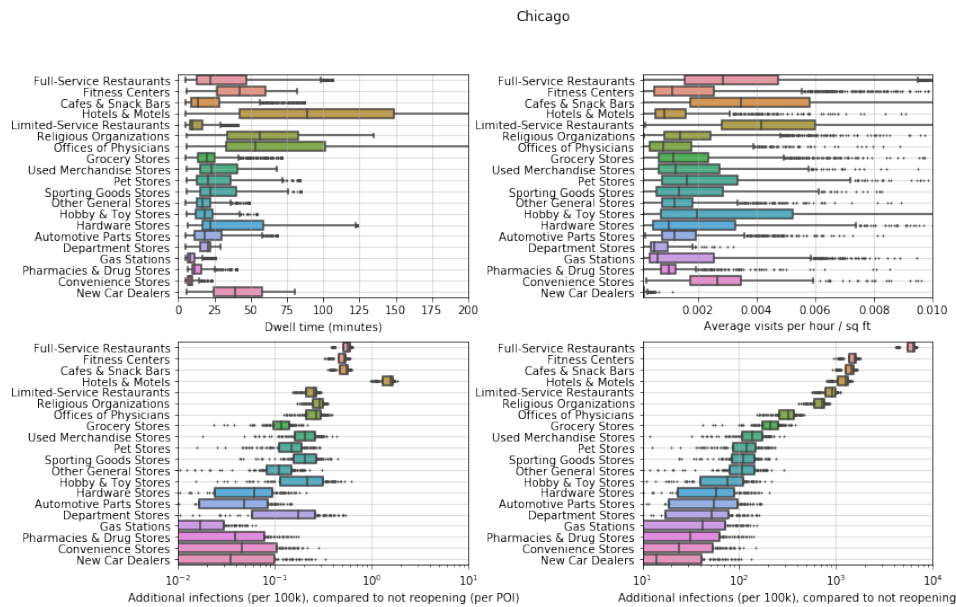

**Figure S11:** POI attributes in Chicago. See Figure S10 for details.

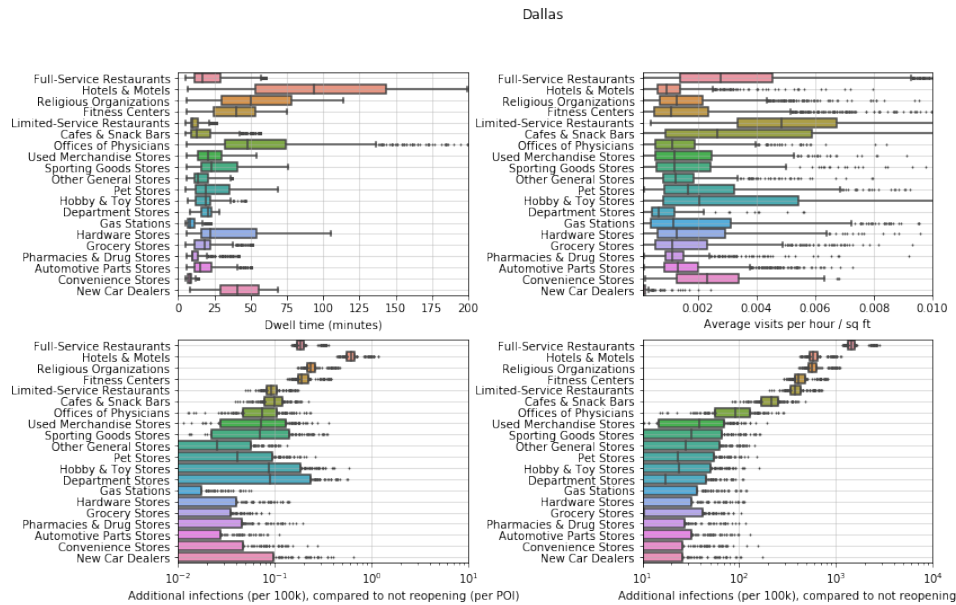

**Figure S12:** POI attributes in Dallas. See Figure S10 for details.

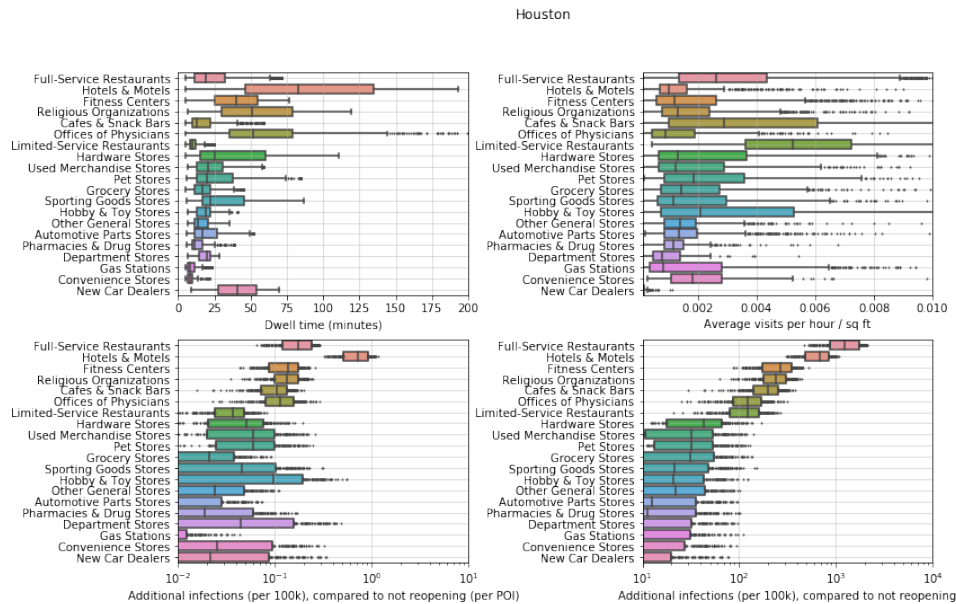

**Figure S13:** POI attributes in Houston. See Figure S10 for details.

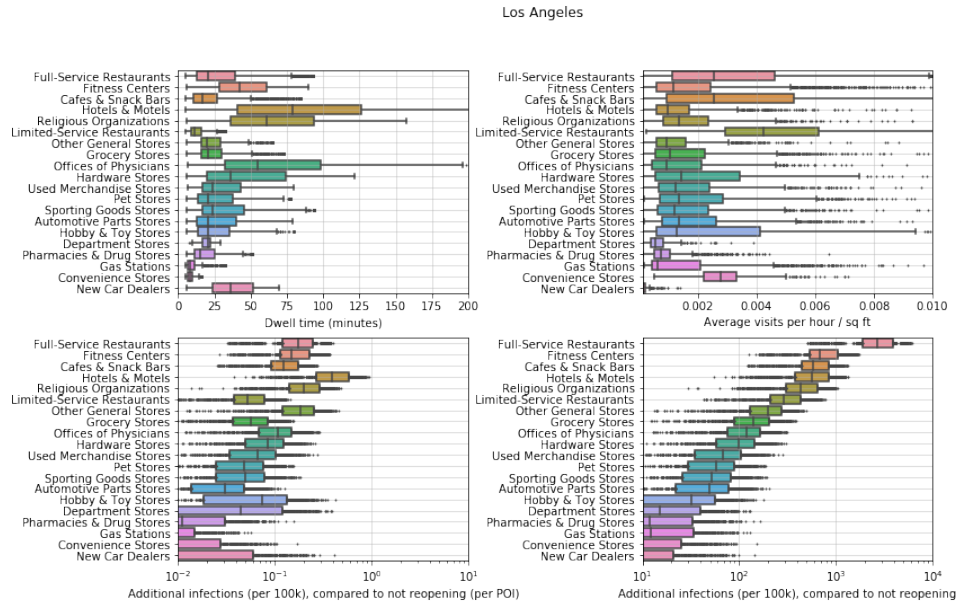

**Figure S14:** POI attributes in Los Angeles. See Figure S10 for details.

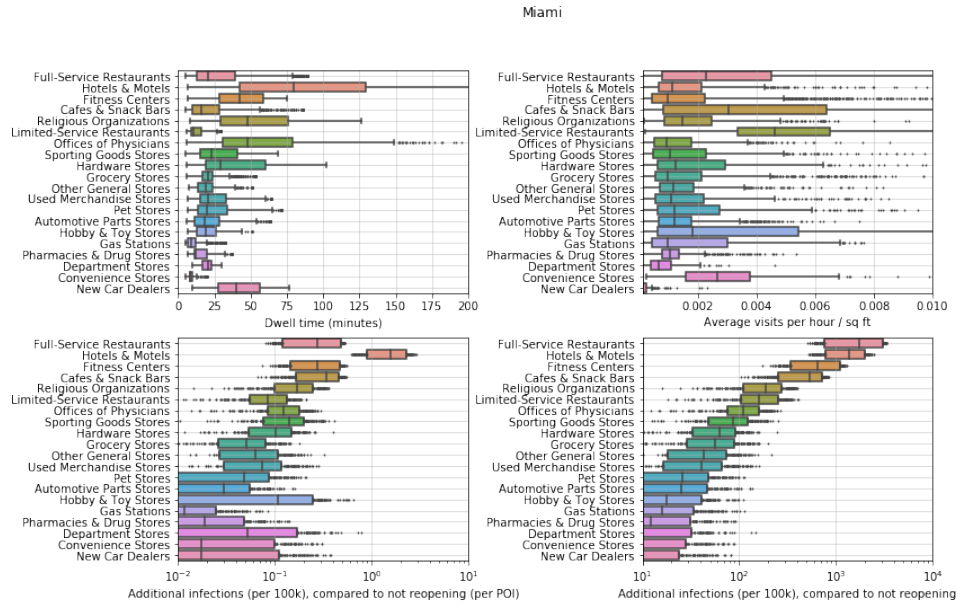

**Figure S15:** POI attributes in Miami. See Figure S10 for details.

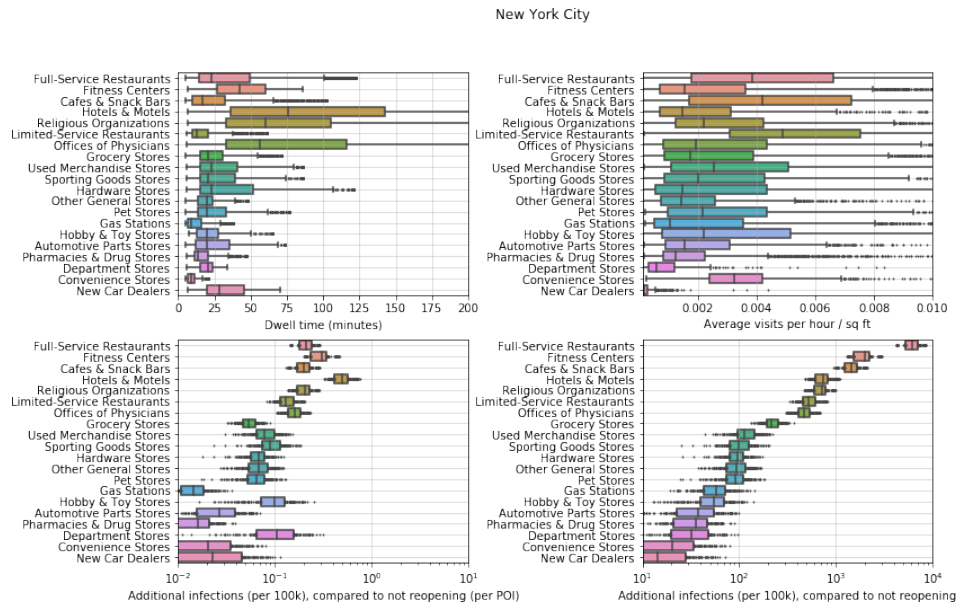

**Figure S16:** POI attributes in New York. See Figure S10 for details.

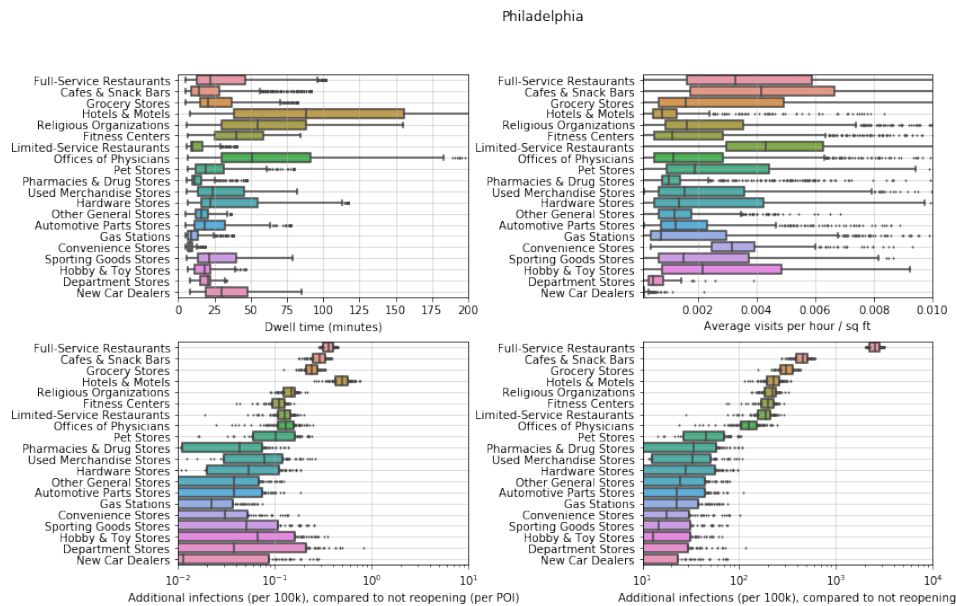

**Figure S17:** POI attributes in Philadelphia. See Figure S10 for details.

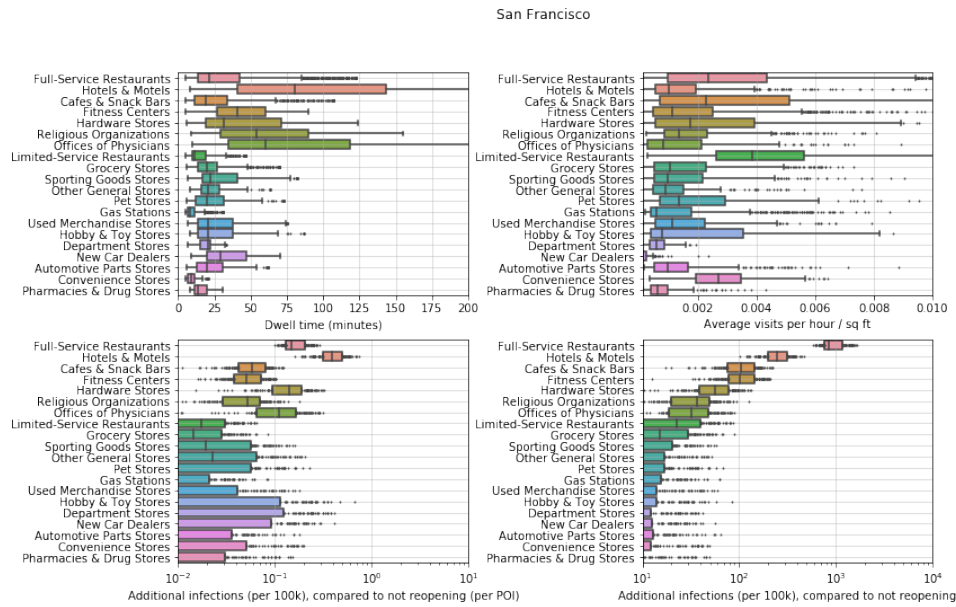

**Figure S18:** POI attributes in San Francisco. See Figure S10 for details.

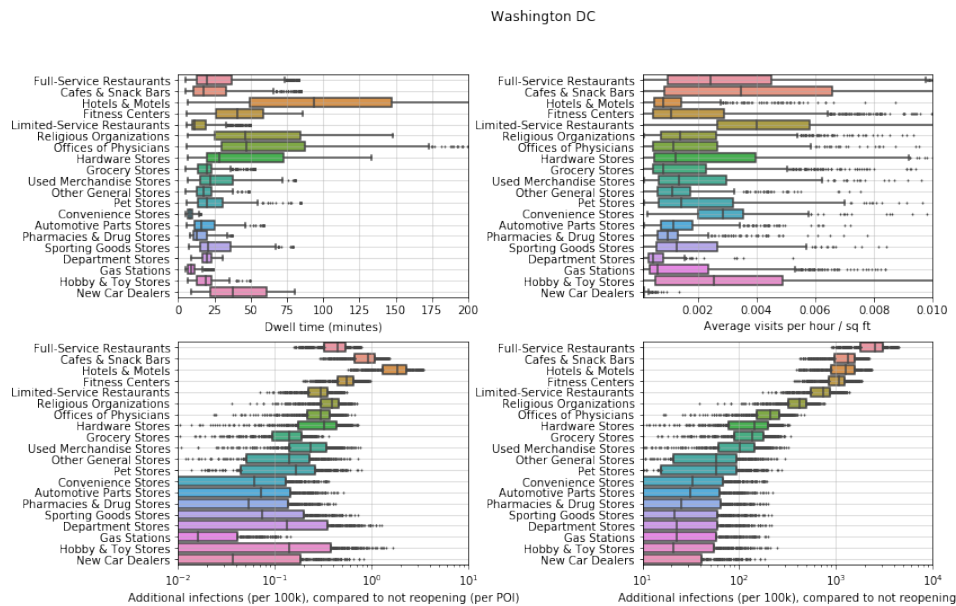

**Figure S19:** POI attributes in Washington DC. See Figure S10 for details.
